# Supplementary material
Source: PubMed Central journal article supplement (PMC8094244)
Supplement: BPA-21-533-s001.pdf [file BPA-21-533-s001.pdf]

| Column ID | Symbol       | p-value | FC(AI delet vs. NI) | Accession number | Description                                                                      |
|-----------|--------------|---------|---------------------|------------------|----------------------------------------------------------------------------------|
| GE83435   | CFC1         | 0.029   | -14.74              | NM_032545        | cripto, FRL-1, cryptic family 1                                                  |
| GE80256   | MB           | 0.030   | -7.60               | NM_005368        | myoglobin                                                                        |
| GE593900  | SOS1         | 0.014   | -7.08               | A1341328         | Transcribed locus                                                                |
| GE61808   | RERGL        | 0.038   | -6.27               | NM_024730        | hypothetical protein FLJ22655                                                    |
| GE86790   | TNC          | 0.006   | -6.27               | X78565           | tenascin C (hexabrachion)                                                        |
| GE588622  | STX18        | 0.026   | -6.12               | BX363588         | syntaxin 18                                                                      |
| GE793773  | RTCD1        | 0.028   | -5.86               | BU537444         | Transcribed locus, weakly similar to XP_524454.1 PREDICTED: hypothetical protein |
| GE765743  | DKFZP451A211 | 0.005   | -5.35               | BX647655         | DKFZp451A211 protein                                                             |
| GE770174  | ONECUT2      | 0.007   | -5.17               | AV688391         | CDNA FLJ42567 fis, clone BRACE3007559                                            |
| GE87131   | GIPC2        | 0.005   | -4.89               | NM_017655        | GIPC PDZ domain containing family, member 2                                      |
| GE796635  | LOC283432    | 0.011   | -4.86               | BC037211         | hypothetical protein LOC283432                                                   |
| GE80174   | SLCO1C1      | 0.035   | -4.62               | NM_017435        | solute carrier organic anion transporter family, member 1C1                      |
| GE59516   | GPR37        | 0.047   | -4.53               | NM_005302        | G protein-coupled receptor 37 (endothelin receptor type B-like)                  |
| GE80597   | RDH8         | 0.042   | -4.46               | NM_015725        | retinol dehydrogenase 8 (all-trans)                                              |
| GE835647  | SBF2         | 0.018   | -4.45               | BM665519         | SET binding factor 2                                                             |
| GE746209  | NCAM1        | 0.030   | -4.41               | BE670666         | Neural cell adhesion molecule 1                                                  |
| GE863743  | LOC100132473 | 0.046   | -4.21               | BF509363         | hypothetical protein LOC100132473                                                |
| GE535765  | GCK          | 0.004   | -4.19               | NM_000162        | glucokinase (hexokinase 4, maturity onset diabetes of the young 2)               |
| GE619539  | BCL2L1       | 0.046   | -4.09               | B1043329         | BCL2-like 1                                                                      |
| GE60399   | ECE1         | 0.001   | -4.09               | BM127612         | Endothelin converting enzyme 1                                                   |
| GE558962  | DIP2C        | 0.016   | -4.08               | N92571           | KIAA0934                                                                         |
| GE797833  | LOC389230    | 0.047   | -4.01               | A1286100         | Hypothetical LOC389230                                                           |
| GE483167  | MAP4K4       | 0.047   | -4.00               | BM988261         | Mitogen-activated protein kinase kinase kinase kinase 4                          |
| GE85201   | SLC37A1      | 0.030   | -3.94               | AK124103         | CDNA FLJ42109 fis, clone TESOP2008563                                            |
| GE663671  | KIF26B       | 0.022   | -3.93               | A1911726         | Hypothetical protein FLJ10157                                                    |
| GE494820  | HS3ST4       | 0.019   | -3.91               | A1698706         | Heparan sulfate (glucosamine) 3-O-sulfotransferase 4                             |
| GE722183  | DENND5B      | 0.024   | -3.90               | BG432514         | Hypothetical protein MGC24039                                                    |
| GE864902  | RABGAP1L     | 0.002   | -3.89               | AW444900         | RAB GTPase activating protein 1-like                                             |
| GE57901   | RAB3B        | 0.019   | -3.89               | NM_002867        | RAB3B, member RAS oncogene family                                                |
| GE80672   | FGF19        | 0.044   | -3.84               | NM_005117        | fibroblast growth factor 19                                                      |
| GE62557   | CLCN1        | 0.023   | -3.83               | NM_000083        | chloride channel 1, skeletal muscle (Thomsen disease, autosomal dominant)        |
| GE575454  | ITGBL1       | 0.015   | -3.82               | AK095102         | Integrin, beta-like 1 (with EGF-like repeat domains)                             |
| GE492776  | ALDH1L2      | 0.017   | -3.81               | BF802115         | Aldehyde dehydrogenase 1 family, member L2                                       |
| GE624065  | PLCB1        | 0.035   | -3.80               | AW271221         | Phospholipase C, beta 1 (phosphoinositide-specific)                              |
| GE606232  | LRP1B        | 0.023   | -3.78               | CB986909         | Low density lipoprotein-related protein 1B (deleted in tumors)                   |
| GE537853  | PC           | 0.022   | -3.75               | A1807935         | Pyruvate carboxylase                                                             |
| GE830886  | CARS         | 0.035   | -3.74               | BF515241         | Cysteinyl-tRNA synthetase                                                        |
| GE557636  | C18ORF2      | 0.017   | -3.66               | NM_031416        | chromosome 18 open reading frame 2                                               |
| GE771211  | IGF1R        | 0.006   | -3.65               | BU590158         | Insulin-like growth factor 1 receptor                                            |
| GE55572   | TESC         | 0.009   | -3.62               | NM_017899        | hypothetical protein FLJ20607                                                    |
| GE495440  | UBR1         | 0.040   | -3.56               | N70681           | Ubiquitin protein ligase E3 component n-recogin 1                                |
| GE87029   | RTN4RL1      | 0.043   | -3.54               | AA453879         | Reticulon 4 receptor-like 1                                                      |
| GE633198  | RUNDC2C      | 0.029   | -3.53               | AA744413         | MRNA; cDNA DKFZp686H0819 (from clone DKFZp686H0819)                              |
| GE54665   | NECAB2       | 0.037   | -3.52               | NM_019065        | EF-hand calcium binding protein 2                                                |
| GE79293   | CLDN3        | 0.008   | -3.50               | NM_001306        | claudin 3                                                                        |
| GE794355  | DEPDC4       | 0.022   | -3.48               | NM_152317        | DEP domain containing 4                                                          |
| GE735571  | BRP44L       | 0.035   | -3.44               | T87067           | Brain protein 44-like                                                            |
| GE781524  | MS4A8B       | 0.005   | -3.40               | BE674652         | Membrane-spanning 4-domains, subfamily A, member 8B                              |

| Column ID | Symbol     | p-value | FC(AI delet vs. NI) | Accession number | Description                                                                      |
|-----------|------------|---------|---------------------|------------------|----------------------------------------------------------------------------------|
| GE79426   | MYL7       | 0.008   | -3.40               | NM_021223        | myosin, light polypeptide 7, regulatory                                          |
| GE513159  | ZNF397     | 0.014   | -3.37               | AA007378         | Transcribed locus, moderately similar to XP_511691.1 PREDICTED: envoplakin [Pan  |
| GE475874  | LCP1       | 0.007   | -3.36               | A1475735         | lymphocyte cytosolic protein 1 (L-plastin)                                       |
| GE80001   | PAX9       | 0.012   | -3.35               | NM_006194        | paired box gene 9                                                                |
| GE500231  | VWF        | 0.038   | -3.33               | N65960           | Von Willebrand factor                                                            |
| GE58254   | FZD2       | 0.027   | -3.32               | NM_001466        | frizzled homolog 2 (Drosophila)                                                  |
| GE83639   | NLRP12     | 0.018   | -3.31               | NM_033297        | NACHT, leucine rich repeat and PYD containing 12                                 |
| GE87923   | PTBP1      | 0.036   | -3.30               | X62006           | polypyrimidine tract binding protein 1                                           |
| GE508448  | LOC144817  | 0.008   | -3.30               | AK056732         | hypothetical protein LOC144817                                                   |
| GE614069  | FLJ22536   | 0.027   | -3.27               | A1634087         | Hypothetical gene supported by AK026189                                          |
| GE85476   | FGF14      | 0.009   | -3.26               | NM_004115        | fibroblast growth factor 14                                                      |
| GE526055  | PLEKHG1    | 0.014   | -3.23               | BU737135         | Pleckstrin homology domain containing, family G (with RhoGef domain) member 1    |
| GE813412  | LOC339316  | 0.012   | -3.22               | BC043286         | hypothetical protein LOC339316                                                   |
| GE828468  | CASP8      | 0.041   | -3.17               | BG258036         | Caspase 8, apoptosis-related cysteine peptidase                                  |
| GE844611  | RHBDD1     | 0.008   | -3.17               | AW294697         | Hypothetical protein LOC84236                                                    |
| GE605114  | ST3GAL3    | 0.014   | -3.15               | A1939358         | ST3 beta-galactoside alpha-2,3-sialyltransferase 3                               |
| GE59333   | EFNB3      | 0.006   | -3.15               | AK027329         | ephrin-B3                                                                        |
| GE886643  | ZNF516     | 0.025   | -3.13               | BG396029         | Zinc finger protein 516                                                          |
| GE81021   | FABP1      | 0.034   | -3.13               | NM_001443        | fatty acid binding protein 1, liver                                              |
| GE774734  | PDE11A     | 0.014   | -3.13               | AW243775         | Phosphodiesterase 11A                                                            |
| GE521452  | LPP        | 0.015   | -3.12               | BQ428740         | FLJ42393 protein                                                                 |
| GE59693   | GLI1       | 0.029   | -3.11               | NM_005269        | glioma-associated oncogene homolog 1 (zinc finger protein)                       |
| GE80201   | RTN1       | 0.034   | -3.10               | NM_021136        | reticulon 1                                                                      |
| GE675916  | HMGX3      | 0.038   | -3.08               | BE646401         | KIAA0194 protein                                                                 |
| GE624474  | HEATR5A    | 0.042   | -3.08               | BX098906         | Chromosome 14 open reading frame 125                                             |
| GE522091  | CADM2      | 0.025   | -3.07               | NM_153184        | immunoglobulin superfamily, member 4D                                            |
| GE525934  | F2RL2      | 0.010   | -3.04               | BC043525         | Coagulation factor II (thrombin) receptor-like 2                                 |
| GE786844  | RPAP2      | 0.028   | -3.03               | A1277314         | Chromosome 1 open reading frame 82                                               |
| GE833951  | TDRD6      | 0.023   | -3.03               | BF057109         | Phospholipase A2, group VII (platelet-activating factor acetylhydrolase, plasma) |
| GE782658  | SOX6       | 0.038   | -3.02               | BX101216         | SRY (sex determining region Y)-box 6                                             |
| GE62462   | KCND2      | 0.000   | -3.01               | NM_012281        | potassium voltage-gated channel, Shal-related subfamily, member 2                |
| GE525291  | TMEM71     | 0.046   | -3.00               | NM_144649        | transmembrane protein 71                                                         |
| GE493031  | B3GALT1    | 0.045   | -3.00               | NM_020981        | UDP-Gal:betaGlcNAc beta 1,3-galactosyltransferase, polypeptide 1                 |
| GE539154  | TLL2       | 0.017   | -2.99               | NM_012465        | tolloid-like 2                                                                   |
| GE56173   | LEF1       | 0.015   | -2.98               | NM_016269        | lymphoid enhancer-binding factor 1                                               |
| GE61224   | ATP5G2     | 0.030   | -2.98               | H83751           | ATP synthase, H+ transporting, mitochondrial F0 complex, subunit c (subunit 9),  |
| GE59525   | TLR3       | 0.015   | -2.97               | NM_003265        | toll-like receptor 3                                                             |
| GE833078  | KIAA0247   | 0.003   | -2.97               | AK127083         | KIAA0247                                                                         |
| GE554330  | FLJ36644   | 0.035   | -2.96               | AK093963         | hypothetical gene supported by AK093963                                          |
| GE653654  | MIER1      | 0.015   | -2.96               | A1702148         | WD repeat domain 78                                                              |
| GE57323   | NEUROD1    | 0.016   | -2.96               | NM_002500        | neurogenic differentiation 1                                                     |
| GE557616  | LOC729147  | 0.040   | -2.95               | A1935382         | Transcribed locus                                                                |
| GE505658  | PTCHD1     | 0.034   | -2.95               | NM_173495        | patched domain containing 1                                                      |
| GE83802   | IMPACT     | 0.039   | -2.93               | AF232229         | hypothetical protein IMPACT                                                      |
| GE479162  | FGF4       | 0.032   | -2.92               | NM_002007        | fibroblast growth factor 4 (heparin secretory transforming protein 1, Kaposi sar |
| GE812224  | NCRNA00086 | 0.025   | -2.89               | BX641629         | Hypothetical protein MGC39606                                                    |
| GE56310   | RCN1       | 0.026   | -2.89               | A1247740         | LOC440135                                                                        |
| GE835183  | PARVG      | 0.047   | -2.89               | AW293504         | Parvin, gamma                                                                    |

| Column ID | Symbol       | p-value | FC(AI delet vs. NI) | Accession number | Description                                                                       |
|-----------|--------------|---------|---------------------|------------------|-----------------------------------------------------------------------------------|
| GE812520  | C2ORF34      | 0.020   | -2.88               | BF196390         | Chromosome 2 open reading frame 34                                                |
| GE81351   | FGF14        | 0.037   | -2.87               | NM_004115        | fibroblast growth factor 14                                                       |
| GE525781  | CDON         | 0.038   | -2.87               | AK022986         | Cdon homolog (mouse)                                                              |
| GE56366   | STAT5B       | 0.021   | -2.87               | AV723605         | Signal transducer and activator of transcription 5B                               |
| GE748783  | ZFHX3        | 0.015   | -2.86               | AW188568         | AT-binding transcription factor 1                                                 |
| GE55303   | SLC23A1      | 0.010   | -2.85               | NM_005847        | solute carrier family 23 (nucleobase transporters), member 1                      |
| GE681995  | KRAS         | 0.046   | -2.84               | AW629226         | V-Ki-ras2 Kirsten rat sarcoma viral oncogene homolog                              |
| GE879159  | FBXO25       | 0.021   | -2.84               | BQ647583         | F-box protein 25                                                                  |
| GE60398   | RUNX3        | 0.013   | -2.83               | NM_004350        | runt-related transcription factor 3                                               |
| GE880225  | DKFZP547K054 | 0.027   | -2.82               | BF194990         | Hypothetical protein DKFZp547K054                                                 |
| GE818835  | LIN54        | 0.020   | -2.82               | BF678497         | Hypothetical protein DKFZp686L1814                                                |
| GE751360  | RGS10        | 0.046   | -2.82               | AA593498         | Regulator of G-protein signalling 10                                              |
| GE739612  | LOC389493    | 0.042   | -2.82               | BX439814         | Similar to Nuclear protein 1 (Protein p8) (Candidate of metastasis 1)             |
| GE54032   | TTY2         | 0.019   | -2.81               | AF000991         | testis-specific transcript, Y-linked 2                                            |
| GE736147  | PCDHGC3      | 0.038   | -2.81               | BF924877         | Protocadherin gamma subfamily A, 12                                               |
| GE59740   | HOXB3        | 0.031   | -2.80               | NM_002146        | homeobox B3                                                                       |
| GE78952   | HNRNPF       | 0.006   | -2.80               | NM_004966        | heterogeneous nuclear ribonucleoprotein F                                         |
| GE501149  | COL27A1      | 0.021   | -2.80               | BC007696         | collagen, type XXVII, alpha 1                                                     |
| GE588628  | USP10        | 0.005   | -2.79               | BF915158         | Ubiquitin specific peptidase 10                                                   |
| GE633096  | SESN3        | 0.016   | -2.78               | AW978341         | Sestrin 3                                                                         |
| GE624229  | BCL11B       | 0.028   | -2.78               | AA033991         | B-cell CLL/lymphoma 11B (zinc finger protein)                                     |
| GE845135  | WDR92        | 0.046   | -2.78               | AW292857         | Hypothetical protein BC014022                                                     |
| GE747802  | DSCAM        | 0.024   | -2.77               | AI929325         | Down syndrome cell adhesion molecule                                              |
| GE525392  | CATSPER4     | 0.011   | -2.77               | AA421134         | Cation channel, sperm associated 4                                                |
| GE654220  | RPH3AL       | 0.039   | -2.75               | AA236651         | rabphilin 3A-like (without C2 domains)                                            |
| GE769024  | NEDD4L       | 0.020   | -2.75               | BF477037         | Neural precursor cell expressed, developmentally down-regulated 4-like            |
| GE526180  | TMEM196      | 0.035   | -2.75               | NM_152774        | hypothetical protein MGC42090                                                     |
| GE902895  | TPH1         | 0.044   | -2.74               | NM_004179        | tryptophan hydroxylase 1 (tryptophan 5-monoxygenase)                              |
| GE82862   | CCNJL        | 0.042   | -2.73               | BF092027         | Hypothetical protein FLJ14166                                                     |
| GE81283   | FZD5         | 0.015   | -2.73               | NM_003468        | frizzled homolog 5 (Drosophila)                                                   |
| GE829609  | C6ORF62      | 0.043   | -2.73               | BM906186         | Chromosome 6 open reading frame 62                                                |
| GE884238  | ZFAND3       | 0.046   | -2.72               | BQ187283         | Zinc finger, AN1-type domain 3                                                    |
| GE599378  | SOCS6        | 0.035   | -2.72               | AA700753         | Suppressor of cytokine signaling 6                                                |
| GE494897  | C1ORF62      | 0.044   | -2.72               | BX099864         | Chromosome 1 open reading frame 62                                                |
| GE59657   | GJB1         | 0.014   | -2.72               | NM_000166        | gap junction protein, beta 1, 32kDa (connexin 32, Charcot-Marie-Tooth neuropathy) |
| GE60503   | PGC          | 0.025   | -2.72               | NM_002630        | progastricsin (pepsinogen C)                                                      |
| GE58058   | GRPR         | 0.021   | -2.72               | NM_005314        | gastrin-releasing peptide receptor                                                |
| GE84509   | CNOT7        | 0.007   | -2.71               | CA392740         | CCR4-NOT transcription complex, subunit 7                                         |
| GE86143   | RPS6KA2      | 0.002   | -2.71               | AK027727         | ribosomal protein S6 kinase, 90kDa, polypeptide 2                                 |
| GE783463  | HNT          | 0.014   | -2.71               | R14751           | Neurotrimin                                                                       |
| GE716639  | DAPK2        | 0.044   | -2.71               | AA180810         | Death-associated protein kinase 2                                                 |
| GE505388  | CALHM2       | 0.027   | -2.71               | AI225020         | Family with sequence similarity 26, member B                                      |
| GE80272   | SSX1         | 0.026   | -2.71               | NM_005635        | synovial sarcoma, X breakpoint 1                                                  |
| GE848456  | PPP1R12B     | 0.037   | -2.71               | BF510523         | Protein phosphatase 1, regulatory (inhibitor) subunit 12B                         |
| GE59707   | VIL1         | 0.020   | -2.70               | NM_007127        | villin 1                                                                          |
| GE62663   | PDCD4        | 0.046   | -2.70               | NM_014456        | programmed cell death 4 (neoplastic transformation inhibitor)                     |
| GE471270  | ARL15        | 0.004   | -2.70               | AK026456         | ADP-ribosylation factor-like 15                                                   |
| GE556466  | WDR40B       | 0.046   | -2.70               | NM_178470        | WD repeat domain 40B                                                              |

| Column ID | Symbol       | p-value | FC(AI delet vs. NI) | Accession number | Description                                                                      |
|-----------|--------------|---------|---------------------|------------------|----------------------------------------------------------------------------------|
| GE54695   | FGF18        | 0.045   | -2.69               | NM_003862        | fibroblast growth factor 18                                                      |
| GE80087   | WNT9A        | 0.016   | -2.68               | NM_003395        | wingless-type MMTV integration site family, member 9A                            |
| GE746389  | C11ORF49     | 0.034   | -2.68               | AI123967         | MGC4707 protein                                                                  |
| GE513392  | GNAO1        | 0.025   | -2.68               | AK093105         | guanine nucleotide binding protein (G protein), alpha activating activity polyp  |
| GE581356  | ARMC4        | 0.026   | -2.67               | H53792           | yq85h08.r1 Soares fetal liver spleen 1NFLS Homo sapiens cDNA clone IMAGE:202623  |
| GE792017  | CUL3         | 0.026   | -2.66               | BE646539         | Cullin 3                                                                         |
| GE56055   | ITM2A        | 0.019   | -2.66               | NM_004867        | integral membrane protein 2A                                                     |
| GE55395   | CCHCR1       | 0.020   | -2.66               | NM_019052        | coiled-coil alpha-helical rod protein 1                                          |
| GE580029  | LOC100132963 | 0.045   | -2.66               | AI149692         | similar to hCG1808463                                                            |
| GE470821  | IMMP2L       | 0.047   | -2.66               | BX089540         | IMP2 inner mitochondrial membrane peptidase-like ( <i>S. cerevisiae</i> )        |
| GE879485  | SCAMP1       | 0.034   | -2.66               | BF511725         | Secretory carrier membrane protein 1                                             |
| GE500217  | LSAMP        | 0.031   | -2.65               | R49462           | Transcribed locus                                                                |
| GE891168  | C11ORF82     | 0.016   | -2.65               | NM_145018        | hypothetical protein FLJ25416                                                    |
| GE562125  | LOC342346    | 0.043   | -2.65               | XM_296817        | similar to hypothetical protein DKFZp434P0316                                    |
| GE611476  | PTGFR        | 0.022   | -2.65               | BU534984         | Prostaglandin F receptor (FP)                                                    |
| GE480386  | LARGE        | 0.033   | -2.64               | BQ045015         | like-glycosyltransferase                                                         |
| GE61226   | RPS13        | 0.040   | -2.64               | NM_001017        | ribosomal protein S13                                                            |
| GE517764  | GTF2E1       | 0.001   | -2.64               | BX099808         | General transcription factor IIE, polypeptide 1, alpha 56kDa                     |
| GE560334  | COL4A3BP     | 0.021   | -2.63               | AW974465         | Collagen, type IV, alpha 3 (Goodpasture antigen) binding protein                 |
| GE708909  | STON2        | 0.046   | -2.63               | BI494557         | Stonin 2                                                                         |
| GE624897  | SLC35F5      | 0.020   | -2.63               | AA446513         | Solute carrier family 35, member F5                                              |
| GE844833  | DIAPH2       | 0.024   | -2.62               | AW292964         | Diaphanous homolog 2 ( <i>Drosophila</i> )                                       |
| GE790256  | RCSD1        | 0.046   | -2.61               | AW027501         | RCSD domain containing 1                                                         |
| GE752862  | TTC21B       | 0.021   | -2.61               | AI812049         | Tetratricopeptide repeat domain 21B                                              |
| GE691871  | AGAP1        | 0.044   | -2.60               | BX103345         | Centaurin, gamma 2                                                               |
| GE513001  | PTPRN2       | 0.021   | -2.60               | AK093884         | Protein tyrosine phosphatase, receptor type, N polypeptide 2                     |
| GE524782  | C21ORF66     | 0.025   | -2.60               | BC038361         | CDNA clone IMAGE:4837199                                                         |
| GE537904  | TMEM49       | 0.038   | -2.60               | BE185268         | Transmembrane protein 49                                                         |
| GE789470  | TGIF1        | 0.016   | -2.60               | BX117081         | TGFB-induced factor (TALE family homeobox)                                       |
| GE497414  | RRM1         | 0.042   | -2.59               | BF510839         | Transcribed locus, strongly similar to NP_002897.1 radixin [Homo sapiens]        |
| GE847994  | ZNF750       | 0.038   | -2.59               | BM988168         | Tubulin-specific chaperone d                                                     |
| GE617133  | SIPA1L3      | 0.033   | -2.59               | BC000772         | Signal-induced proliferation-associated 1 like 3                                 |
| GE685070  | ARMC9        | 0.036   | -2.59               | BF437252         | Armadillo repeat containing 9                                                    |
| GE583888  | NKX2-3       | 0.015   | -2.58               | NM_145285        | NK2 transcription factor related, locus 3 ( <i>Drosophila</i> )                  |
| GE53879   | NRXN2        | 0.017   | -2.58               | NM_015080        | neurexin 2                                                                       |
| GE57660   | MIF          | 0.007   | -2.58               | AW162060         | Macrophage migration inhibitory factor (glycosylation-inhibiting factor)         |
| GE59180   | P2RX1        | 0.008   | -2.58               | NM_002558        | purinergic receptor P2X, ligand-gated ion channel, 1                             |
| GE558478  | FNDC3A       | 0.036   | -2.57               | BF771477         | Fibronectin type III domain containing 3A                                        |
| GE728241  | HCG2036778   | 0.019   | -2.57               | AA909454         | Transcribed locus                                                                |
| GE880824  | TAF3         | 0.043   | -2.57               | BM904502         | TAF3 RNA polymerase II, TATA box binding protein (TBP)-associated factor, 140kDa |
| GE743043  | DNAI1        | 0.021   | -2.57               | BE550140         | Dynein, axonemal, intermediate polypeptide 1                                     |
| GE60093   | LIG3         | 0.044   | -2.56               | NM_013975        | ligase III, DNA, ATP-dependent                                                   |
| GE581516  | EGFR         | 0.003   | -2.56               | AK024321         | Homo sapiens cDNA FLJ14259 fis, clone PLACE1001076.                              |
| GE511768  | DNAJB8       | 0.009   | -2.56               | NM_153330        | DnaJ (Hsp40) homolog, subfamily B, member 8                                      |
| GE753147  | NEURL        | 0.027   | -2.56               | BG008030         | neuralized homolog ( <i>Drosophila</i> )                                         |
| GE526190  | CCDC42       | 0.040   | -2.55               | NM_144681        | coiled-coil domain containing 42                                                 |
| GE851667  | EMCN         | 0.014   | -2.55               | AW293210         | Endomucin                                                                        |
| GE606631  | CFH          | 0.015   | -2.55               | W91942           | Transcribed locus                                                                |

| Column ID | Symbol       | p-value | FC(AI delet vs. NI) | Accession number | Description                                                                      |
|-----------|--------------|---------|---------------------|------------------|----------------------------------------------------------------------------------|
| GE883383  | TMEM196      | 0.027   | -2.55               | BX647256         | hypothetical protein MGC42090                                                    |
| GE835642  | TGFBR3       | 0.040   | -2.55               | BF509889         | Transforming growth factor, beta receptor III (betaglycan, 300kDa)               |
| GE742952  | NGLY1        | 0.039   | -2.55               | AI425043         | N-glycanase 1                                                                    |
| GE716674  | CSMD2        | 0.040   | -2.55               | AA805541         | High-mobility group box 4                                                        |
| GE480459  | FAM111B      | 0.009   | -2.55               | NM_198947        | cancer-associated nucleoprotein                                                  |
| GE84677   | ANKH         | 0.028   | -2.55               | W02417           | Ankylosis, progressive homolog (mouse)                                           |
| GE733189  | COL11A1      | 0.023   | -2.54               | AK022035         | Collagen, type XI, alpha 1                                                       |
| GE496650  | TRIM67       | 0.009   | -2.54               | BE465331         | Hypothetical protein FLJ30430                                                    |
| GE537757  | SIRPB2       | 0.031   | -2.54               | BG539998         | Protein tyrosine phosphatase, non-receptor type substrate 1-like 3               |
| GE821046  | NCRNA00153   | 0.035   | -2.53               | BQ187306         | Chromosome 20 open reading frame 19                                              |
| GE59665   | LALBA        | 0.048   | -2.53               | NM_002289        | lactalbumin, alpha-                                                              |
| GE782075  | CDH13        | 0.042   | -2.53               | AF088013         | Cadherin 13, H-cadherin (heart)                                                  |
| GE897537  | NCAM2        | 0.008   | -2.53               | AK021495         | Neural cell adhesion molecule 2                                                  |
| GE833485  | PSMG4        | 0.044   | -2.52               | AK126623         | hypothetical LOC389362                                                           |
| GE495765  | LOC100129869 | 0.023   | -2.52               | AK128005         | unnamed protein product; Homo sapiens cDNA FLJ46124 fis, clone TESTI2040372.     |
| GE57571   | HMGCL        | 0.041   | -2.51               | NM_000191        | 3-hydroxymethyl-3-methylglutaryl-Coenzyme A lyase (hydroxymethylglutaricaciduria |
| GE855844  | TRAF3IP2     | 0.024   | -2.51               | AW138021         | TRAF3 interacting protein 2                                                      |
| GE53516   | PKN3         | 0.034   | -2.51               | NM_013355        | protein kinase N3                                                                |
| GE83267   | KCNA7        | 0.049   | -2.50               | NM_031886        | potassium voltage-gated channel, shaker-related subfamily, member 7              |
| GE632575  | SHROOM1      | 0.049   | -2.50               | AI828458         | Apical protein 2                                                                 |
| GE786167  | FAM107B      | 0.043   | -2.50               | AA203497         | Chromosome 10 open reading frame 45                                              |
| GE749824  | EPX          | 0.045   | -2.50               | BE222258         | Eosinophil peroxidase                                                            |
| GE85378   | SLC35D3      | 0.017   | -2.50               | AI306597         | Solute carrier family 35, member D3                                              |
| GE741024  | C10ORF114    | 0.041   | -2.50               | CB409529         | Chromosome 10 open reading frame 114                                             |
| GE60460   | TNFRSF11B    | 0.048   | -2.49               | NM_002546        | tumor necrosis factor receptor superfamily, member 11b (osteoprotegerin)         |
| GE80182   | PCDHB4       | 0.047   | -2.48               | NM_018938        | protocadherin beta 4                                                             |
| GE905225  | TAAR1        | 0.026   | -2.48               | NM_138327        | trace amine associated receptor 1                                                |
| GE662738  | TYW3         | 0.042   | -2.48               | CA446960         | Chromosome 1 open reading frame 171                                              |
| GE644990  | HOXC6        | 0.039   | -2.48               | BX113221         | Hypothetical gene supported by AK022887; AK056417                                |
| GE57766   | HTR6         | 0.045   | -2.47               | NM_000871        | 5-hydroxytryptamine (serotonin) receptor 6                                       |
| GE62969   | FFAR2        | 0.045   | -2.47               | NM_005306        | G protein-coupled receptor 43                                                    |
| GE786149  | EMP1         | 0.044   | -2.47               | AI446224         | Epithelial membrane protein 1                                                    |
| GE719460  | ZEB1         | 0.045   | -2.47               | BQ329735         | Transcription factor 8 (represses interleukin 2 expression)                      |
| GE589466  | LARP1        | 0.027   | -2.47               | AA972120         | La ribonucleoprotein domain family, member 1                                     |
| GE719466  | MYT1L        | 0.024   | -2.47               | BF110303         | Myelin transcription factor 1-like                                               |
| GE62642   | MYBPC3       | 0.002   | -2.46               | NM_000256        | myosin binding protein C, cardiac                                                |
| GE796784  | ADAM10       | 0.023   | -2.46               | BF751109         | ADAM metalloproteinase domain 10                                                 |
| GE687167  | MSRA         | 0.049   | -2.46               | CB068665         | Methionine sulfoxide reductase A                                                 |
| GE660733  | RBMS3        | 0.006   | -2.46               | AA425671         | RNA binding motif, single stranded interacting protein                           |
| GE81638   | DRAP1        | 0.008   | -2.46               | NM_006442        | DR1-associated protein 1 (negative cofactor 2 alpha)                             |
| GE59756   | HIVEP1       | 0.013   | -2.45               | NM_002114        | human immunodeficiency virus type I enhancer binding protein 1                   |
| GE86433   | BTG1         | 0.044   | -2.45               | BC009050         | B-cell translocation gene 1, anti-proliferative                                  |
| GE570886  | C18ORF19     | 0.046   | -2.45               | NM_152352        | chromosome 18 open reading frame 19                                              |
| GE86022   | RAP1A        | 0.026   | -2.45               | AU126086         | RAP1A, member of RAS oncogene family                                             |
| GE483166  | LTF          | 0.022   | -2.45               | W86820           | Lactotransferrin                                                                 |
| GE654270  | FBP1         | 0.042   | -2.45               | AI052624         | Fructose-1,6-bisphosphatase 1                                                    |
| GE53263   | ST18         | 0.021   | -2.44               | NM_014682        | suppression of tumorigenicity 18 (breast carcinoma) (zinc finger protein)        |
| GE60019   | FAM12A       | 0.032   | -2.44               | NM_006683        | family with sequence similarity 12, member A                                     |

| Column ID | Symbol       | p-value | FC(AI delet vs. NI) | Accession number | Description                                                                      |
|-----------|--------------|---------|---------------------|------------------|----------------------------------------------------------------------------------|
| GE714590  | WDR1         | 0.031   | -2.44               | AI247365         | WD repeat domain 1                                                               |
| GE59129   | MAP2K6       | 0.036   | -2.44               | NM_002758        | mitogen-activated protein kinase kinase 6                                        |
| GE53254   | WSCD1        | 0.033   | -2.43               | BE766697         | KIAA0523 protein                                                                 |
| GE517496  | CARD14       | 0.033   | -2.43               | NM_024110        | caspase recruitment domain family, member 14                                     |
| GE522142  | IREB2        | 0.027   | -2.43               | AI283837         | Iron-responsive element binding protein 2                                        |
| GE58059   | PRPH2        | 0.042   | -2.43               | NM_000322        | retinal degeneration, slow                                                       |
| GE886395  | LOC145783    | 0.028   | -2.42               | BF972343         | hypothetical LOC145783                                                           |
| GE763215  | IQCH         | 0.047   | -2.42               | BI022639         | Full-length cDNA clone CS0DC021YJ09 of Neuroblastoma Cot 25-normalized of Homo s |
| GE579121  | LOC439957    | 0.013   | -2.42               | AI654903         | Similar to Ig kappa chain V region (Z4) - human                                  |
| GE791697  | MTSS1        | 0.014   | -2.42               | W02191           | NADH dehydrogenase (ubiquinone) 1 beta subcomplex, 9, 22kDa                      |
| GE511971  | CASC2        | 0.006   | -2.42               | NM_178816        | cancer susceptibility candidate 2                                                |
| GE80437   | C13ORF28     | 0.021   | -2.41               | NM_145248        | LOC122258                                                                        |
| GE777598  | STAM         | 0.007   | -2.41               | AW852409         | Signal transducing adaptor molecule (SH3 domain and ITAM motif) 1                |
| GE622884  | PSMB7        | 0.002   | -2.41               | BX113527         | Myeloproliferative disease associated tumor antigen 5                            |
| GE533121  | MUC7         | 0.005   | -2.40               | NM_152291        | mucin 7, salivary                                                                |
| GE475806  | MYADML       | 0.039   | -2.40               | BC031088         | myeloid-associated differentiation marker-like                                   |
| GE526938  | CBX6         | 0.033   | -2.40               | NM_014292        | chromobox homolog 6                                                              |
| GE56553   | GLTSCR2      | 0.044   | -2.40               | NM_015710        | glioma tumor suppressor candidate region gene 2                                  |
| GE481254  | DKFZP547K054 | 0.008   | -2.39               | BX110656         | Hypothetical protein DKFZp547K054                                                |
| GE54134   | CDH16        | 0.000   | -2.39               | NM_004062        | cadherin 16, KSP-cadherin                                                        |
| GE88234   | LOC146429    | 0.009   | -2.39               | AL137382         | hypothetical protein LOC146429                                                   |
| GE848911  | KCNJ5        | 0.048   | -2.38               | AA506997         | MRNA; cDNA DKFZp779F2345 (from clone DKFZp779F2345)                              |
| GE777120  | FAM40B       | 0.023   | -2.38               | AW028153         | Family with sequence similarity 40, member B                                     |
| GE592353  | NCOA2        | 0.043   | -2.38               | AW979075         | Nuclear receptor coactivator 2                                                   |
| GE515574  | LOC729897    | 0.018   | -2.38               | BE244176         | Hypothetical LOC200475                                                           |
| GE765929  | FLJ42709     | 0.019   | -2.37               | AW022410         | Hypothetical gene supported by AK124699                                          |
| GE567884  | UNC45B       | 0.027   | -2.37               | NM_173167        | unc-45 homolog B (C. elegans)                                                    |
| GE581421  | LOC440981    | 0.047   | -2.37               | BG214950         | Similar to CG32056-PA                                                            |
| GE544076  | CD300LG      | 0.013   | -2.36               | NM_145273        | CD300 antigen like family member G                                               |
| GE818605  | THUMPD1      | 0.044   | -2.36               | BG166339         | THUMP domain containing 1                                                        |
| GE59319   | RPL3L        | 0.043   | -2.36               | NM_005061        | ribosomal protein L3-like                                                        |
| GE57091   | CREM         | 0.025   | -2.35               | NM_182717        | cAMP responsive element modulator                                                |
| GE80774   | FAM181A      | 0.020   | -2.35               | NM_138344        | chromosome 14 open reading frame 152                                             |
| GE903194  | TPR          | 0.013   | -2.34               | AI332534         | Translocated promoter region (to activated MET oncogene)                         |
| GE816230  | RORA         | 0.019   | -2.34               | T90468           | RAR-related orphan receptor A                                                    |
| GE529951  | LOC100132624 | 0.043   | -2.34               | CB050297         | KLK16 mRNA, partial sequence                                                     |
| GE848179  | PHF14        | 0.012   | -2.34               | BQ027674         | PHD finger protein 14                                                            |
| GE57467   | GP1BA        | 0.049   | -2.34               | NM_000173        | glycoprotein Ib (platelet), alpha polypeptide                                    |
| GE585328  | PPP1R16B     | 0.039   | -2.34               | AL833255         | Protein phosphatase 1, regulatory (inhibitor) subunit 16B                        |
| GE517767  | FLJ39061     | 0.022   | -2.33               | AK096380         | hypothetical protein FLJ39061                                                    |
| GE81440   | OTOF         | 0.041   | -2.33               | NM_004802        | otoferlin                                                                        |
| GE61471   | KRT83        | 0.022   | -2.33               | NM_002282        | keratin, hair, basic, 3                                                          |
| GE58777   | RCVRN        | 0.011   | -2.31               | NM_002903        | recoverin                                                                        |
| GE60551   | C7ORF28A     | 0.030   | -2.31               | AA558437         | Chromosome 7 open reading frame 28B                                              |
| GE87197   | MAPKAP1      | 0.008   | -2.31               | AI629026         | Mitogen-activated protein kinase associated protein 1                            |
| GE56133   | SH3BGR2      | 0.016   | -2.31               | NM_031469        | SH3 domain binding glutamic acid-rich protein like 2                             |
| GE62639   | ABCC2        | 0.044   | -2.31               | NM_000392        | ATP-binding cassette, sub-family C (CFTR/MRP), member 2                          |
| GE618665  | HELLS        | 0.020   | -2.31               | AW273055         | Helicase, lymphoid-specific                                                      |

| Column ID | Symbol    | p-value | FC(AI delet vs. NI) | Accession number | Description                                                                      |
|-----------|-----------|---------|---------------------|------------------|----------------------------------------------------------------------------------|
| GE675811  | IQCH      | 0.021   | -2.30               | AA203355         | IQ motif containing H                                                            |
| GE53484   | SNF1LK2   | 0.019   | -2.30               | AB096248         | SNF1-like kinase 2                                                               |
| GE755852  | PDCD4     | 0.037   | -2.30               | BX507202         | Programmed cell death 4 (neoplastic transformation inhibitor)                    |
| GE805982  | FAT3      | 0.038   | -2.30               | CA426935         | FAT tumor suppressor homolog 3 (Drosophila)                                      |
| GE891568  | MRPL43    | 0.040   | -2.30               | NM_176792        | mitochondrial ribosomal protein L43                                              |
| GE644283  | ADH5      | 0.019   | -2.29               | AA700426         | Alcohol dehydrogenase 5 (class III), chi polypeptide                             |
| GE85094   | C7ORF44   | 0.007   | -2.29               | AK024861         | Homo sapiens cDNA: FLJ21208 fis, clone COL00363.                                 |
| GE756165  | PTK2      | 0.028   | -2.28               | AW977253         | PTK2 protein tyrosine kinase 2                                                   |
| GE58627   | APIP      | 0.006   | -2.28               | NM_015957        | APAF1 interacting protein                                                        |
| GE716337  | KLF12     | 0.030   | -2.27               | BX109619         | Kruppel-like factor 12                                                           |
| GE83133   | RGS5      | 0.035   | -2.27               | CD677889         | Regulator of G-protein signalling 5                                              |
| GE56675   | ATPAF1    | 0.045   | -2.27               | A1908678         | ATP synthase mitochondrial F1 complex assembly factor 1                          |
| GE597285  | EEA1      | 0.036   | -2.27               | AW975982         | Early endosome antigen 1, 162kD                                                  |
| GE58293   | SELP      | 0.028   | -2.27               | NM_003005        | selectin P (granule membrane protein 140kDa, antigen CD62)                       |
| GE85814   | RPL13A    | 0.048   | -2.27               | BC000514         | ribosomal protein L13a                                                           |
| GE484762  | CCDC146   | 0.036   | -2.27               | B1042346         | coiled-coil domain containing 146                                                |
| GE81380   | ALK       | 0.017   | -2.26               | NM_004304        | anaplastic lymphoma kinase (Ki-1)                                                |
| GE520935  | SNX30     | 0.009   | -2.26               | BE764638         | Sorting nexin family member 30                                                   |
| GE53068   | NRCAM     | 0.021   | -2.26               | NM_005010        | neuronal cell adhesion molecule                                                  |
| GE80474   | SLC22A17  | 0.021   | -2.26               | NM_016609        | solute carrier family 22 (organic cation transporter), member 17                 |
| GE523513  | NXPH3     | 0.026   | -2.26               | NM_007225        | neurexophilin 3                                                                  |
| GE826474  | ZNF346    | 0.034   | -2.26               | BF529156         | Zinc finger protein 346                                                          |
| GE59093   | PTK7      | 0.020   | -2.25               | NM_002821        | PTK7 protein tyrosine kinase 7                                                   |
| GE87868   | ALG9      | 0.046   | -2.25               | NM_024740        | asparagine-linked glycosylation 9 homolog (yeast, alpha 1,2 mannosyltransferase) |
| GE799491  | KCNJ12    | 0.033   | -2.25               | BG338507         | Potassium inwardly-rectifying channel, subfamily J, member 12                    |
| GE58465   | SERGEF    | 0.037   | -2.25               | NM_012139        | deafness locus associated putative guanine nucleotide exchange factor            |
| GE844404  | CASQ1     | 0.012   | -2.25               | BM467196         | calsequestrin 1 (fast-twitch, skeletal muscle)                                   |
| GE85482   | ETF1      | 0.029   | -2.24               | M75715           | eukaryotic translation termination factor 1                                      |
| GE852404  | LOC727869 | 0.002   | -2.24               | AW015982         | Transcribed locus                                                                |
| GE61697   | MAGED4B   | 0.009   | -2.24               | NM_030801        | melanoma antigen family D, 4                                                     |
| GE59654   | G6PD      | 0.021   | -2.23               | NM_000402        | glucose-6-phosphate dehydrogenase                                                |
| GE680494  | PDE10A    | 0.037   | -2.23               | R37728           | Phosphodiesterase 10A                                                            |
| GE744385  | SLC47A1   | 0.009   | -2.23               | A1638691         | Hypothetical protein FLJ10847                                                    |
| GE555090  | LOC286370 | 0.012   | -2.23               | BC039331         | hypothetical protein LOC286370                                                   |
| GE81892   | ZBTB44    | 0.032   | -2.23               | NM_014155        | BTB (POZ) domain containing 15                                                   |
| GE874492  | PNLIPRP3  | 0.024   | -2.23               | BG033763         | Pancreatic lipase-related protein 3                                              |
| GE585308  | PLEKHA2   | 0.037   | -2.23               | AA911673         | pleckstrin homology domain containing, family A (phosphoinositide binding speci  |
| GE669869  | DSCAML1   | 0.015   | -2.22               | AA010973         | Down syndrome cell adhesion molecule like 1                                      |
| GE548004  | BICD1     | 0.021   | -2.22               | BQ181282         | Bicaudal D homolog 1 (Drosophila)                                                |
| GE56967   | ARMC7     | 0.043   | -2.22               | N64394           | Armadillo repeat containing 7                                                    |
| GE849284  | FAM65C    | 0.032   | -2.22               | BQ011791         | family with sequence similarity 65, member C                                     |
| GE765386  | NFAT5     | 0.041   | -2.21               | AW859722         | Nuclear factor of activated T-cells 5, tonicity-responsive                       |
| GE824447  | RSBN1     | 0.028   | -2.21               | BQ429614         | Round spermatid basic protein 1                                                  |
| GE749522  | ZRANB3    | 0.017   | -2.21               | A1065106         | Zinc finger, RAN-binding domain containing 3                                     |
| GE501251  | LOC121952 | 0.033   | -2.21               | AF339833         | Hypothetical protein LOC121952                                                   |
| GE54339   | HTATIP2   | 0.029   | -2.21               | NM_006410        | HIV-1 Tat interactive protein 2, 30kDa                                           |
| GE62350   | HSD17B12  | 0.005   | -2.20               | NM_016142        | hydroxysteroid (17-beta) dehydrogenase 12                                        |
| GE629023  | SH3RF1    | 0.050   | -2.20               | AA393551         | Transcribed locus                                                                |

| Column ID | Symbol       | p-value | FC(AI delet vs. NI) | Accession number | Description                                                                    |
|-----------|--------------|---------|---------------------|------------------|--------------------------------------------------------------------------------|
| GE80233   | TRPC7        | 0.025   | -2.20               | NM_020389        | transient receptor potential cation channel, subfamily C, member 7             |
| GE57330   | NPAT         | 0.048   | -2.20               | NM_002519        | nuclear protein, ataxia-telangiectasia locus                                   |
| GE474321  | EPB41L1      | 0.027   | -2.20               | BM971731         | Erythrocyte membrane protein band 4.1-like 1                                   |
| GE852806  | ADARB2       | 0.014   | -2.19               | AW293835         | Adenosine deaminase, RNA-specific, B2 (RED2 homolog rat)                       |
| GE87223   | GPR110       | 0.023   | -2.19               | NM_153840        | G protein-coupled receptor 110                                                 |
| GE54361   | LILRA4       | 0.043   | -2.19               | NM_012276        | leukocyte immunoglobulin-like receptor, subfamily A (with TM domain), member 4 |
| GE85571   | GPT2         | 0.032   | -2.19               | NM_133443        | glutamic pyruvate transaminase (alanine aminotransferase) 2                    |
| GE88552   | CPO          | 0.008   | -2.19               | NM_173077        | carboxypeptidase O                                                             |
| GE750407  | ATP12A       | 0.032   | -2.19               | BC035268         | ATPase, H+/K+ transporting, nongastric, alpha polypeptide                      |
| GE763044  | FAM59A       | 0.012   | -2.19               | H84097           | Family with sequence similarity 59, member A                                   |
| GE640629  | BDH1         | 0.011   | -2.19               | W86052           | LOC442100                                                                      |
| GE746499  | DNAH5        | 0.049   | -2.19               | A1927879         | Dynein, axonemal, heavy polypeptide 5                                          |
| GE854563  | MLL3         | 0.027   | -2.19               | BQ720078         | Myeloid/lymphoid or mixed-lineage leukemia 3                                   |
| GE555790  | LOXL1        | 0.017   | -2.19               | AK056885         | lysyl oxidase-like 1                                                           |
| GE602927  | KIF6         | 0.002   | -2.18               | N74402           | Kinesin family member 6                                                        |
| GE768589  | CEP164       | 0.040   | -2.18               | BU159474         | Similar to hypothetical protein FLJ36492                                       |
| GE518429  | FLJ43663     | 0.028   | -2.18               | AW084563         | hypothetical LOC378805                                                         |
| GE767150  | CSDA         | 0.050   | -2.18               | A1222658         | Cold shock domain protein A                                                    |
| GE57342   | MAML1        | 0.036   | -2.17               | NM_014757        | mastermind-like 1 (Drosophila)                                                 |
| GE80000   | CD300C       | 0.034   | -2.17               | NM_006678        | CD300C antigen                                                                 |
| GE729964  | SLC1A2       | 0.039   | -2.17               | A1124744         | Solute carrier family 1 (glial high affinity glutamate transporter), member 2  |
| GE87454   | SGK269       | 0.015   | -2.17               | B1869593         | KIAA2002 protein                                                               |
| GE524660  | LOC202451    | 0.045   | -2.17               | BC022980         | hypothetical protein LOC202451                                                 |
| GE569634  | SLIT3        | 0.048   | -2.17               | BF509794         | Transcribed locus                                                              |
| GE828459  | CDC26        | 0.024   | -2.17               | AA399531         | Solute carrier family 31 (copper transporters), member 1                       |
| GE88240   | BBS12        | 0.044   | -2.16               | NM_152618        | hypothetical protein FLJ35630                                                  |
| GE57940   | PRKACB       | 0.028   | -2.16               | NM_002731        | protein kinase, cAMP-dependent, catalytic, beta                                |
| GE61257   | EMR3         | 0.008   | -2.16               | NM_032571        | egf-like module containing, mucin-like, hormone receptor-like 3                |
| GE832527  | NRP2         | 0.029   | -2.16               | BU738899         | Neuropilin 2                                                                   |
| GE56181   | LHCGR        | 0.044   | -2.16               | AL049443         | TFIIA-alpha/beta-like factor                                                   |
| GE508119  | CCDC108      | 0.037   | -2.16               | AK092605         | Hypothetical protein DKFZp434O0527                                             |
| GE577479  | WDR88        | 0.016   | -2.15               | NM_173479        | hypothetical protein LOC126248                                                 |
| GE88331   | SDK1         | 0.017   | -2.15               | NM_152744        | sidekick homolog 1 (chicken)                                                   |
| GE79771   | PPAPDC1B     | 0.011   | -2.15               | NM_032483        | phosphatidic acid phosphatase type 2 domain containing 1B                      |
| GE478173  | POLR1E       | 0.031   | -2.14               | A1652887         | Polymerase (RNA) I associated factor 1                                         |
| GE609747  | UBE3A        | 0.012   | -2.14               | A1280028         | ubiquitin protein ligase E3A                                                   |
| GE726212  | KIF6         | 0.016   | -2.14               | N58267           | Kinesin family member 6                                                        |
| GE83256   | NRIP2        | 0.032   | -2.14               | NM_031474        | nuclear receptor interacting protein 2                                         |
| GE685216  | INO80        | 0.013   | -2.14               | A1682281         | INO80 homolog (S. cerevisiae)                                                  |
| GE653969  | CCNJL        | 0.043   | -2.14               | BE328090         | Hypothetical protein FLJ14166                                                  |
| GE697209  | PPTC7        | 0.043   | -2.13               | AA805719         | T-cell activation protein phosphatase 2C                                       |
| GE722961  | ITGB6        | 0.036   | -2.13               | BG191465         | Transcribed locus                                                              |
| GE814676  | DKFZP434G179 | 0.034   | -2.13               | AL137337         | hypothetical protein DKFZp434G179                                              |
| GE734379  | UBE2H        | 0.009   | -2.13               | AW968686         | Ubiquitin-conjugating enzyme E2H (UBC8 homolog, yeast)                         |
| GE822311  | HPGD         | 0.007   | -2.13               | BG619134         | Hydroxyprostaglandin dehydrogenase 15-(NAD)                                    |
| GE745147  | MED13L       | 0.018   | -2.13               | BF055521         | mediator complex subunit 13-like                                               |
| GE625099  | LOC647323    | 0.033   | -2.12               | A1271617         | hypothetical protein LOC647323                                                 |
| GE81344   | CDKN1B       | 0.029   | -2.12               | NM_004064        | cyclin-dependent kinase inhibitor 1B (p27, Kip1)                               |



| Column ID | Symbol                  | p-value | FC(AI delet vs. NI) | Accession number | Description                                                                     |
|-----------|-------------------------|---------|---------------------|------------------|---------------------------------------------------------------------------------|
| GE54895   | SLC16A8                 | 0.020   | -2.12               | AF132611         | solute carrier 16 (monocarboxylic acid transporters), member 8                  |
| GE518833  | UNQ6975                 | 0.041   | -2.12               | BQ020437         | NGNL6975                                                                        |
| GE84596   | AARS2                   | 0.012   | -2.12               | AB033096         | alanyl-tRNA synthetase like                                                     |
| GE529732  | HCG2042779              | 0.007   | -2.12               | BU738825         | hCG2042779                                                                      |
| GE53806   | AMIGO1                  | 0.014   | -2.12               | W88515           | Adhesion molecule with Ig-like domain 1                                         |
| GE581211  | CLYBL                   | 0.030   | -2.11               | AI419840         | Citrate lyase beta like                                                         |
| GE501576  | C15ORF43                | 0.020   | -2.10               | NM_152448        | hypothetical protein MGC33951                                                   |
| GE707690  | CPNE2                   | 0.044   | -2.10               | AI660863         | Copine II                                                                       |
| GE519791  | BACH2(includesEG:60468) | 0.001   | -2.10               | AW978120         | BTB and CNC homology 1, basic leucine zipper transcription factor 2             |
| GE749628  | MMP21                   | 0.008   | -2.10               | NM_147191        | matrix metalloproteinase 21                                                     |
| GE605811  | RIMS1                   | 0.008   | -2.10               | BE673740         | Regulating synaptic membrane exocytosis 1                                       |
| GE805234  | C6ORF154                | 0.007   | -2.09               | BM128735         | Chromosome 6 open reading frame 154                                             |
| GE82595   | CD209                   | 0.033   | -2.09               | NM_021155        | CD209 antigen                                                                   |
| GE84742   | SH2D6                   | 0.022   | -2.08               | NM_198482        | similar to B-cell linker; B cell linker protein                                 |
| GE478609  | VN1R2                   | 0.012   | -2.08               | NM_173856        | vomeroneasal 1 receptor 2                                                       |
| GE862854  | IFIT2                   | 0.028   | -2.08               | BF511134         | Interferon-induced protein with tetratricopeptide repeats 2                     |
| GE755129  | APBA1                   | 0.024   | -2.07               | AA121632         | amyloid beta (A4) precursor protein-binding, family A, member 1                 |
| GE54060   | CDON                    | 0.024   | -2.06               | NM_016952        | Cdon homolog (mouse)                                                            |
| GE698541  | SPAG16                  | 0.041   | -2.06               | BQ102344         | Sperm associated antigen 16                                                     |
| GE81474   | MED13                   | 0.039   | -2.06               | NM_005121        | thyroid hormone receptor associated protein 1                                   |
| GE82966   | MAGIX                   | 0.017   | -2.06               | NM_024859        | PDZ domain containing, X chromosome                                             |
| GE721877  | CCDC40                  | 0.022   | -2.06               | AI191633         | Coiled-coil domain containing 40                                                |
| GE621039  | TSPAN8                  | 0.010   | -2.06               | AI475154         | Tetraspanin 8                                                                   |
| GE662098  | GEM                     | 0.018   | -2.05               | BX112717         | GTP binding protein overexpressed in skeletal muscle                            |
| GE596368  | LRRC39                  | 0.009   | -2.05               | BF060753         | Leucine rich repeat containing 39                                               |
| GE60025   | NUCB2                   | 0.048   | -2.05               | NM_005013        | nucleobindin 2                                                                  |
| GE517049  | PHACTR3                 | 0.045   | -2.05               | AL832577         | Phosphatase and actin regulator 3                                               |
| GE675190  | LOC100129965            | 0.007   | -2.05               | BM711811         | PR domain containing 11                                                         |
| GE57831   | CYP11A1                 | 0.005   | -2.05               | NM_000781        | cytochrome P450, family 11, subfamily A, polypeptide 1                          |
| GE867446  | TM7SF3                  | 0.026   | -2.05               | AW452923         | Transmembrane 7 superfamily member 3                                            |
| GE484443  | NFKBID                  | 0.046   | -2.05               | AK126825         | T-cell activation NFKB-like protein                                             |
| GE85385   | MAML3                   | 0.045   | -2.04               | NM_018717        | mastermind-like 3 (Drosophila)                                                  |
| GE82109   | H19                     | 0.030   | -2.04               | BF996346         | H19, imprinted maternally expressed untranslated mRNA                           |
| GE82804   | C11ORF49                | 0.002   | -2.04               | NM_024113        | MGC4707 protein                                                                 |
| GE79945   | ZFPM2                   | 0.034   | -2.04               | NM_012082        | zinc finger protein, multitype 2                                                |
| GE79817   | INHBE                   | 0.010   | -2.04               | NM_031479        | inhibin, beta E                                                                 |
| GE776646  | PUS10                   | 0.038   | -2.04               | AW172503         | Hypothetical protein FLJ32312                                                   |
| GE601874  | RWDD3                   | 0.031   | -2.04               | AI480240         | RWD domain containing 3                                                         |
| GE567161  | TAS2R39                 | 0.029   | -2.04               | NM_176881        | taste receptor, type 2, member 39                                               |
| GE82408   | GABRQ                   | 0.029   | -2.03               | NM_018558        | gamma-aminobutyric acid (GABA) receptor, theta                                  |
| GE59709   | MYBL2                   | 0.033   | -2.03               | NM_002466        | v-myb myeloblastosis viral oncogene homolog (avian)-like 2                      |
| GE53431   | NOL4                    | 0.020   | -2.03               | NM_003787        | nucleolar protein 4                                                             |
| GE582937  | MRRF                    | 0.024   | -2.03               | C15527           | Mitochondrial ribosome recycling factor                                         |
| GE723220  | PUS3                    | 0.039   | -2.03               | BU567489         | pseudouridylate synthase 3                                                      |
| GE59708   | DAO                     | 0.047   | -2.03               | NM_001917        | D-amino-acid oxidase                                                            |
| GE726210  | FNDC3B                  | 0.001   | -2.03               | AW438419         | Fibronectin type III domain containing 3B                                       |
| GE81797   | RPL13A                  | 0.025   | -2.03               | NM_012423        | ribosomal protein L13a                                                          |
| GE526607  | PTTG1IP                 | 0.024   | -2.03               | AL603150         | Integrin, beta 2 (antigen CD18 (p95), lymphocyte function-associated antigen 1; |

| Column ID | Symbol       | p-value | FC(AI delet vs. NI) | Accession number | Description                                                                      |
|-----------|--------------|---------|---------------------|------------------|----------------------------------------------------------------------------------|
| GE833631  | PPP2R5C      | 0.027   | -2.02               | AI350654         | protein phosphatase 2, regulatory subunit B', gamma isoform                      |
| GE630605  | ZC3H11A      | 0.015   | -2.02               | BM789135         | Zinc finger CCH-type containing 11A                                              |
| GE710362  | M6PRBP1      | 0.033   | -2.02               | BM974065         | Mannose-6-phosphate receptor binding protein 1                                   |
| GE80056   | MPPED2       | 0.001   | -2.02               | NM_001584        | metallophosphoesterase domain containing 2                                       |
| GE544920  | LOC100129460 | 0.005   | -2.02               | AK026768         | dpy-19-like 1 pseudogene 1 (C. elegans)                                          |
| GE775756  | LOC285547    | 0.028   | -2.01               | AK096368         | hypothetical protein LOC285547                                                   |
| GE600991  | MAL2         | 0.029   | -2.00               | AA912839         | Mal, T-cell differentiation protein 2                                            |
| GE83790   | DCN          | 0.032   | -2.00               | AI990925         | Decorin                                                                          |
| GE59569   | GABRE        | 0.037   | -2.00               | NM_004961        | gamma-aminobutyric acid (GABA) A receptor, epsilon                               |
| GE62594   | C11ORF58     | 0.005   | -2.00               | NM_014267        | small acidic protein                                                             |
| GE56587   | ASXL3        | 0.038   | -2.00               | AL133050         | KIAA1713                                                                         |
| GE58366   | GNE          | 0.024   | -2.00               | NM_005476        | glucosamine (UDP-N-acetyl)-2-epimerase/N-acetylmannosamine kinase                |
| GE83168   | FCRL2        | 0.043   | -2.00               | NM_030764        | Fc receptor-like 2                                                               |
| GE569300  | LOC100132005 | 0.043   | -1.99               | BQ876865         | hypothetical LOC100132005                                                        |
| GE512891  | LOC400238    | 0.030   | -1.99               | BX090735         | Hypothetical gene supported by AK093266                                          |
| GE482180  | EXT2         | 0.018   | -1.99               | AV718935         | exostoses (multiple) 2                                                           |
| GE525301  | NRXN3        | 0.021   | -1.99               | BX248745         | Full-length cDNA 5-PRIME end of clone CSOCAP002YE20 of Thymus of Homo sapiens (h |
| GE661622  | GOLSYN       | 0.021   | -1.99               | AA741565         | Hypothetical protein FLJ20366                                                    |
| GE58844   | PLK1         | 0.032   | -1.99               | NM_005030        | polo-like kinase 1 (Drosophila)                                                  |
| GE628980  | GRIN2B       | 0.047   | -1.99               | AA167284         | Glutamate receptor, ionotropic, N-methyl D-aspartate 2B                          |
| GE782793  | TAF15        | 0.040   | -1.99               | AI821243         | TAF15 RNA polymerase II, TATA box binding protein (TBP)-associated factor, 68kDa |
| GE62563   | EPHB4        | 0.006   | -1.98               | AW579301         | CKLF-like MARVEL transmembrane domain containing 6                               |
| GE598156  | CADPS        | 0.010   | -1.98               | BC029460         | Ca <sup>2+</sup> -dependent secretion activator                                  |
| GE887127  | C2ORF74      | 0.007   | -1.98               | BF673400         | Hypothetical gene supported by AK075484; BC014578                                |
| GE789484  | XRCC2        | 0.028   | -1.97               | BG494177         | X-ray repair complementing defective repair in Chinese hamster cells 2           |
| GE481130  | ASZ1         | 0.012   | -1.97               | NM_130768        | ankyrin repeat, SAM and basic leucine zipper domain containing 1                 |
| GE669527  | LRCH1        | 0.031   | -1.97               | AA211791         | Leucine-rich repeats and calponin homology (CH) domain containing 1              |
| GE53638   | RPH3A        | 0.022   | -1.97               | NM_014954        | rabphilin 3A homolog (mouse)                                                     |
| GE82136   | TMEM216      | 0.047   | -1.97               | NM_016499        | HSPC244                                                                          |
| GE79570   | GYLTL1B      | 0.038   | -1.97               | NM_152312        | glycosyltransferase-like 1B                                                      |
| GE679215  | LOC100133219 | 0.013   | -1.96               | AI798232         | hypothetical protein LOC100133219                                                |
| GE791348  | RAB4B        | 0.025   | -1.96               | BC040374         | RAB4B, member RAS oncogene family                                                |
| GE800001  | PDE7B        | 0.043   | -1.96               | AK000141         | Phosphodiesterase 7B                                                             |
| GE62927   | PTBP2        | 0.023   | -1.96               | NM_021190        | polypyrimidine tract binding protein 2                                           |
| GE607838  | CPXM2        | 0.018   | -1.95               | BI826310         | Carboxypeptidase X (M14 family), member 2                                        |
| GE702391  | FYN          | 0.039   | -1.95               | AV661514         | FYN oncogene related to SRC, FGR, YES                                            |
| GE85747   | OR8B4        | 0.009   | -1.95               | XM_210186        | synonyms: OR8B4P, OR11-315; olfactory receptor, family 8, subfamily B, member 4  |
| GE623550  | RAP1B        | 0.044   | -1.95               | AI400344         | RAP1B, member of RAS oncogene family                                             |
| GE892802  | RUNDC2B      | 0.008   | -1.95               | AA865087         | Similar to FLJ12363 protein                                                      |
| GE903141  | LOC283697    | 0.044   | -1.95               | AK096061         | hypothetical protein LOC283697                                                   |
| GE61564   | ALPL         | 0.040   | -1.94               | NM_000478        | alkaline phosphatase, liver/bone/kidney                                          |
| GE765670  | MBNL1        | 0.034   | -1.94               | BG942732         | Muscleblind-like (Drosophila)                                                    |
| GE671345  | PRAGMIN      | 0.039   | -1.94               | AA608841         | Hypothetical protein DKFZp761P0423                                               |
| GE803371  | IMPAD1       | 0.047   | -1.93               | R71416           | Inositol monophosphatase domain containing 1                                     |
| GE549804  | EIF3M        | 0.002   | -1.93               | CA414434         | Dendritic cell protein                                                           |
| GE79495   | TMEM125      | 0.049   | -1.93               | NM_144626        | hypothetical protein MGC17299                                                    |
| GE476680  | STK39        | 0.032   | -1.93               | BU664651         | Serine threonine kinase 39 (STE20/SPS1 homolog, yeast)                           |
| GE832160  | PLEKHG1      | 0.043   | -1.92               | BU753068         | pleckstrin homology domain containing, family G (with RhoGef domain) member 1    |

| Column ID | Symbol       | p-value | FC(AI delet vs. NI) | Accession number | Description                                                                      |
|-----------|--------------|---------|---------------------|------------------|----------------------------------------------------------------------------------|
| GE56511   | DLC1         | 0.039   | -1.92               | NM_006094        | deleted in liver cancer 1                                                        |
| GE686302  | BRWD1        | 0.028   | -1.92               | BX103387         | Bromodomain and WD repeat domain containing 1                                    |
| GE53960   | KCNT1        | 0.046   | -1.92               | AB037843         | potassium channel, subfamily T, member 1                                         |
| GE56656   | COPB1        | 0.016   | -1.92               | NM_016451        | coatamer protein complex, subunit beta                                           |
| GE507358  | WNT4         | 0.040   | -1.91               | W72348           | Wingless-type MMTV integration site family, member 4                             |
| GE899954  | CD200        | 0.015   | -1.91               | BF368117         | CD200 antigen                                                                    |
| GE80534   | CLDN17       | 0.002   | -1.91               | NM_012131        | claudin 17                                                                       |
| GE841944  | SMYD3        | 0.032   | -1.91               | BF515527         | SET and MYND domain containing 3                                                 |
| GE572585  | FAM47A       | 0.028   | -1.91               | BC026171         | family with sequence similarity 47, member A                                     |
| GE80975   | HCG1640785   | 0.031   | -1.91               | F28158           | ribosomal protein S25 pseudogene                                                 |
| GE705190  | PBX3         | 0.041   | -1.91               | AA521307         | Pre-B-cell leukemia transcription factor 3                                       |
| GE487008  | CACNG5       | 0.008   | -1.91               | NM_014404        | calcium channel, voltage-dependent, gamma subunit 5                              |
| GE499342  | FAM160A1     | 0.029   | -1.91               | AA021503         | Similar to RIKEN cDNA 9930021J17                                                 |
| GE60029   | ACVR2B       | 0.021   | -1.90               | NM_001106        | activin A receptor, type IIB                                                     |
| GE85242   | C1GALT1      | 0.026   | -1.90               | BX496307         | Core 1 synthase, glycoprotein-N-acetylgalactosamine 3-beta-galactosyltransferase |
| GE746085  | AIDA         | 0.028   | -1.90               | A1873250         | axin interactor, dorsalization associated                                        |
| GE711341  | FANCM        | 0.022   | -1.90               | BE350003         | Fanconi anemia, complementation group M                                          |
| GE665321  | LOC100132644 | 0.041   | -1.90               | AA159978         | Transcribed locus                                                                |
| GE552711  | ZNF292       | 0.038   | -1.89               | H02806           | Zinc finger protein 292                                                          |
| GE577021  | CERKL        | 0.043   | -1.89               | BC020465         | Homo sapiens cDNA clone IMAGE:3870103.                                           |
| GE585809  | FAM83G       | 0.024   | -1.89               | A1365243         | family with sequence similarity 83, member G                                     |
| GE55783   | PRMT6        | 0.014   | -1.88               | NM_018137        | HMT1 hnRNP methyltransferase-like 6 (S. cerevisiae)                              |
| GE53530   | CAMTA1       | 0.016   | -1.88               | A1267687         | Calmodulin binding transcription activator 1                                     |
| GE836273  | PACSN3       | 0.024   | -1.88               | BF939328         | Protein kinase C and casein kinase substrate in neurons 3                        |
| GE86233   | NAMPT        | 0.024   | -1.88               | BF095282         | Pre-B-cell colony enhancing factor 1                                             |
| GE79155   | RPS3         | 0.010   | -1.88               | CB126340         | Ribosomal protein S3                                                             |
| GE832977  | GPR153       | 0.032   | -1.88               | AW138499         | G protein-coupled receptor 153                                                   |
| GE88158   | BAT4         | 0.030   | -1.88               | NM_033177        | HLA-B associated transcript 4                                                    |
| GE87873   | WARS2        | 0.021   | -1.88               | BM854501         | Tryptophanyl tRNA synthetase 2 (mitochondrial)                                   |
| GE480710  | RNF169       | 0.009   | -1.88               | BE676540         | Similar to ribosomal protein L31                                                 |
| GE87482   | RDH10        | 0.048   | -1.88               | NM_172037        | retinol dehydrogenase 10 (all-trans)                                             |
| GE529431  | RPP30        | 0.015   | -1.88               | AK095810         | hypothetical protein LOC283012                                                   |
| GE875279  | CTD-2514C3.1 | 0.036   | -1.87               | BF038828         | hypothetical LOC100134868                                                        |
| GE675434  | VTI1A        | 0.046   | -1.87               | NM_145206        | vesicle transport through interaction with t-SNAREs homolog 1A (yeast)           |
| GE561708  | PAQR4        | 0.035   | -1.87               | NM_152341        | progesterone and adipoQ receptor family member IV                                |
| GE86327   | HIST1H2BH    | 0.039   | -1.86               | BX507388         | Histone 1, H2bh                                                                  |
| GE53363   | KIAA0652     | 0.000   | -1.86               | NM_014741        | KIAA0652                                                                         |
| GE497758  | ZDBF2        | 0.031   | -1.86               | AK002005         | KIAA1571 protein                                                                 |
| GE57479   | VDR          | 0.040   | -1.86               | NM_000376        | vitamin D (1,25-dihydroxyvitamin D3) receptor                                    |
| GE57501   | CCL4         | 0.044   | -1.86               | NM_002984        | chemokine (C-C motif) ligand 4                                                   |
| GE879086  | GTPBP1       | 0.010   | -1.86               | BF514555         | GTP binding protein 1                                                            |
| GE59772   | ERCC2        | 0.017   | -1.86               | NM_000400        | excision repair cross-complementing rodent repair deficiency, complementation gr |
| GE688225  | AKAP13       | 0.029   | -1.86               | AW973471         | A kinase (PRKA) anchor protein 13                                                |
| GE757151  | SEC22B       | 0.046   | -1.85               | AK023270         | SEC22 vesicle trafficking protein-like 1 (S. cerevisiae)                         |
| GE84594   | NAP1L1       | 0.028   | -1.85               | BC002387         | nucleosome assembly protein 1-like 1                                             |
| GE630971  | LIMCH1       | 0.016   | -1.85               | A1351179         | DKFZP686A01247 hypothetical protein                                              |
| GE898884  | ZDHHC16      | 0.019   | -1.85               | AA350398         | zinc finger, DHHC-type containing 16                                             |
| GE81295   | HIST1H2BF    | 0.031   | -1.85               | NM_003522        | histone 1, H2bf                                                                  |

| Column ID | Symbol   | p-value | FC(AI delet vs. NI) | Accession number | Description                                                                      |
|-----------|----------|---------|---------------------|------------------|----------------------------------------------------------------------------------|
| GE58519   | SNX11    | 0.048   | -1.85               | NM_013323        | sorting nexin 11                                                                 |
| GE793196  | PAX1     | 0.030   | -1.85               | AI027131         | Paired box gene 1                                                                |
| GE62790   | TSHB     | 0.017   | -1.85               | AI366963         | Transcribed locus, strongly similar to XP_575014.1 PREDICTED: similar to RIKEN c |
| GE487850  | C21ORF58 | 0.031   | -1.85               | AY039243         | chromosome 21 open reading frame 58                                              |
| GE546078  | GLIPR1L2 | 0.005   | -1.85               | NM_152436        | hypothetical protein MGC39497                                                    |
| GE81015   | DNAH8    | 0.048   | -1.85               | NM_001371        | dynein, axonemal, heavy polypeptide 8                                            |
| GE56899   | PLA2G12A | 0.048   | -1.85               | H28612           | Full-length cDNA clone CS0DF027YF17 of Fetal brain of Homo sapiens (human)       |
| GE469953  | CALHM1   | 0.007   | -1.85               | BC036208         | family with sequence similarity 26, member C                                     |
| GE551139  | SPHKAP   | 0.020   | -1.85               | AI290868         | SPHK1 (sphingosine kinase type 1) interacting protein                            |
| GE584891  | SEC31A   | 0.017   | -1.84               | BX110326         | SEC31-like 1 (S. cerevisiae)                                                     |
| GE610283  | DAZAP1   | 0.034   | -1.84               | AW664787         | DAZ associated protein 1                                                         |
| GE572293  | FLJ12547 | 0.023   | -1.84               | AI678116         | hypothetical protein FLJ12547                                                    |
| GE772355  | UTP14C   | 0.019   | -1.84               | R64064           | Similar to hypothetical protein B230397C21                                       |
| GE873396  | CPNE8    | 0.034   | -1.84               | BQ924206         | Copine VIII                                                                      |
| GE82899   | E2F8     | 0.045   | -1.84               | NM_024680        | E2F transcription factor 8                                                       |
| GE678262  | MICAL3   | 0.015   | -1.84               | AA769428         | Microtubule associated monooxygenase, calponin and LIM domain containing 3       |
| GE59015   | LSS      | 0.042   | -1.83               | NM_002340        | lanosterol synthase (2,3-oxidosqualene-lanosterol cyclase)                       |
| GE876472  | KLHL31   | 0.024   | -1.83               | BF694569         | Transcribed locus, moderately similar to NP_536845.1 cytochrome c oxidase subuni |
| GE545565  | KRTAP9-2 | 0.022   | -1.83               | NM_031961        | keratin associated protein 9-2                                                   |
| GE80489   | ASB4     | 0.001   | -1.83               | NM_016116        | ankyrin repeat and SOCS box-containing 4                                         |
| GE607884  | ATAD3A   | 0.050   | -1.83               | BX114825         | Transcribed locus                                                                |
| GE83996   | SIGLEC15 | 0.049   | -1.83               | AK095432         | CD33 antigen-like 3                                                              |
| GE88508   | RPL28    | 0.026   | -1.83               | NM_000991        | ribosomal protein L28                                                            |
| GE623041  | ANKH     | 0.030   | -1.83               | BX119305         | Ankylosis, progressive homolog (mouse)                                           |
| GE60069   | HTR5A    | 0.018   | -1.83               | NM_024012        | 5-hydroxytryptamine (serotonin) receptor 5A                                      |
| GE799775  | KIAA1432 | 0.023   | -1.83               | BX104718         | KIAA1432                                                                         |
| GE56202   | PDCD4    | 0.024   | -1.82               | NM_014456        | programmed cell death 4 (neoplastic transformation inhibitor)                    |
| GE57241   | HDAC1    | 0.004   | -1.82               | NM_004964        | histone deacetylase 1                                                            |
| GE884445  | CCDC67   | 0.047   | -1.82               | BG492295         | Hypothetical protein FLJ25393                                                    |
| GE55212   | CLDN9    | 0.015   | -1.82               | NM_020982        | claudin 9                                                                        |
| GE837414  | CDH13    | 0.041   | -1.82               | AW297466         | Cadherin 13, H-cadherin (heart)                                                  |
| GE471434  | CD44     | 0.025   | -1.82               | AL702902         | CD44 antigen (homing function and Indian blood group system)                     |
| GE765148  | TASP1    | 0.007   | -1.82               | BI496961         | Taspase, threonine aspartase, 1                                                  |
| GE82299   | KBTD4    | 0.004   | -1.81               | AK001312         | kelch repeat and BTB (POZ) domain containing 4                                   |
| GE591944  | WDR27    | 0.048   | -1.81               | AI033599         | WD repeat domain 27                                                              |
| GE653339  | CPNE5    | 0.006   | -1.81               | BX118391         | Copine V                                                                         |
| GE62179   | FIGNL1   | 0.027   | -1.81               | AL834387         | figetin-like 1                                                                   |
| GE63235   | EPPK1    | 0.032   | -1.81               | AB051895         | epiplakin 1                                                                      |
| GE789856  | PDE4B    | 0.043   | -1.81               | N36873           | Transcribed locus, weakly similar to XP_517655.1 PREDICTED: similar to KIAA0825  |
| GE521480  | C19ORF16 | 0.042   | -1.81               | BC031875         | chromosome 19 open reading frame 16                                              |
| GE62372   | ICA1     | 0.016   | -1.80               | AA838019         | Islet cell autoantigen 1, 69kDa                                                  |
| GE829712  | LOXL1    | 0.045   | -1.80               | BF512044         | Lysyl oxidase-like 1                                                             |
| GE838614  | TLL1     | 0.036   | -1.80               | BQ027232         | Tubulin tyrosine ligase-like family, member 11                                   |
| GE589776  | ELF1     | 0.037   | -1.80               | H80081           | E74-like factor 1 (ets domain transcription factor)                              |
| GE56657   | TWF2     | 0.029   | -1.79               | NM_007284        | PTK9L protein tyrosine kinase 9-like (A6-related protein)                        |
| GE85997   | ATP5L    | 0.045   | -1.79               | NM_006476        | ATP synthase, H+ transporting, mitochondrial F0 complex, subunit g               |
| GE62107   | ZFYVE9   | 0.002   | -1.79               | NM_004799        | zinc finger, FYVE domain containing 9                                            |
| GE586118  | COBLL1   | 0.015   | -1.79               | AI186265         | COBL-like 1                                                                      |

| Column ID | Symbol                  | p-value | FC(AI delet vs. NI) | Accession number | Description                                                                       |
|-----------|-------------------------|---------|---------------------|------------------|-----------------------------------------------------------------------------------|
| GE787068  | MAP3K5(includesEG:4217) | 0.041   | -1.79               | AV710568         | mitogen-activated protein kinase kinase kinase 5                                  |
| GE82249   | CCDC109B                | 0.024   | -1.78               | NM_017918        | hypothetical protein FLJ20647                                                     |
| GE792954  | PCSK2                   | 0.025   | -1.78               | CA773152         | Proprotein convertase subtilisin/kexin type 2                                     |
| GE85827   | PNLIPRP3                | 0.035   | -1.78               | AL833418         | pancreatic lipase-related protein 3                                               |
| GE83496   | PLCD4                   | 0.037   | -1.78               | NM_032726        | phospholipase C, delta 4                                                          |
| GE530584  | PVRIG                   | 0.038   | -1.78               | AA923161         | Opposite strand transcription unit to STAG3                                       |
| GE62098   | GPR27                   | 0.045   | -1.78               | NM_018971        | G protein-coupled receptor 27                                                     |
| GE485904  | EIF4E3                  | 0.021   | -1.78               | AI652910         | Eukaryotic translation initiation factor 4E member 3                              |
| GE499204  | LOC220980               | 0.031   | -1.78               | BX378393         | Hypothetical protein LOC220980                                                    |
| GE564061  | ANO5                    | 0.033   | -1.78               | AL832374         | transmembrane protein 16E                                                         |
| GE85608   | PVRIG                   | 0.032   | -1.78               | CF455431         | Stromal antigen 3                                                                 |
| GE749133  | ASH1L                   | 0.036   | -1.78               | AW593839         | POU domain, class 6, transcription factor 1                                       |
| GE79750   | GOLM1                   | 0.008   | -1.78               | NM_016548        | golgi phosphoprotein 2                                                            |
| GE82478   | CCBL2                   | 0.019   | -1.78               | BQ373191         | RNA binding motif protein, X-linked-like 1                                        |
| GE53605   | CORO2B                  | 0.041   | -1.77               | NM_006091        | coronin, actin binding protein, 2B                                                |
| GE750029  | LOC283089               | 0.047   | -1.77               | AK094649         | hypothetical protein LOC283089                                                    |
| GE473371  | TNRC18                  | 0.045   | -1.77               | BU950138         | KIAA1856 protein                                                                  |
| GE817529  | C3                      | 0.027   | -1.77               | H75739           | Complement component 3                                                            |
| GE650985  | LOC200772               | 0.049   | -1.77               | BU682871         | Similar to KIAA0445 protein                                                       |
| GE781678  | LRCH1                   | 0.036   | -1.77               | N75768           | leucine-rich repeats and calponin homology (CH) domain containing 1               |
| GE55076   | TRAF3                   | 0.047   | -1.77               | AA644442         | TNF receptor-associated factor 3                                                  |
| GE79604   | EIF4EBP1                | 0.019   | -1.77               | NM_004095        | eukaryotic translation initiation factor 4E binding protein 1                     |
| GE861693  | LOC729620               | 0.049   | -1.76               | BX117828         | hypothetical LOC729620                                                            |
| GE78981   | ZNF581                  | 0.047   | -1.76               | AW250591         | Zinc finger protein 581                                                           |
| GE58166   | GTF2H1                  | 0.002   | -1.76               | NM_005316        | general transcription factor IIH, polypeptide 1, 62kDa                            |
| GE895185  | ZNF37B                  | 0.016   | -1.76               | AK026980         | zinc finger protein 37b (KOX 21)                                                  |
| GE85852   | DMWD                    | 0.004   | -1.76               | AA400004         | Dystrophia myotonica-containing WD repeat motif                                   |
| GE57701   | EDC4                    | 0.033   | -1.76               | NM_014329        | autoantigen                                                                       |
| GE870303  | PTPN3                   | 0.031   | -1.76               | AW014624         | Protein tyrosine phosphatase, non-receptor type 3                                 |
| GE87755   | LYG2                    | 0.002   | -1.76               | NM_175735        | lysozyme-like                                                                     |
| GE82708   | GPR135                  | 0.012   | -1.76               | NM_022571        | G protein-coupled receptor 135                                                    |
| GE604352  | SNX21                   | 0.040   | -1.76               | AW970898         | Chromosome 20 open reading frame 161                                              |
| GE57218   | CKAP5                   | 0.002   | -1.76               | NM_014756        | cytoskeleton associated protein 5                                                 |
| GE80370   | KSR1                    | 0.021   | -1.75               | BC035488         | Kinase suppressor of ras 1                                                        |
| GE847439  | ATP5S                   | 0.037   | -1.75               | AW450915         | ATP synthase, H+ transporting, mitochondrial F0 complex, subunit s (factor B)     |
| GE58898   | SLC1A1                  | 0.008   | -1.75               | NM_004170        | solute carrier family 1 (neuronal/epithelial high affinity glutamate transporter) |
| GE469916  | TACC2                   | 0.046   | -1.75               | BX111019         | transforming, acidic coiled-coil containing protein 2                             |
| GE590663  | NKAIN2                  | 0.046   | -1.75               | AA984073         | T-cell lymphoma breakpoint associated target 1                                    |
| GE62837   | MAPK8IP1                | 0.008   | -1.75               | NM_005456        | mitogen-activated protein kinase 8 interacting protein 1                          |
| GE53192   | HS2ST1                  | 0.027   | -1.75               | NM_012262        | heparan sulfate 2-O-sulfotransferase 1                                            |
| GE570139  | LOC729376               | 0.028   | -1.75               | CF528549         | CDNA FLJ43945 fis, clone TEST14014445                                             |
| GE721358  | AADACL1                 | 0.027   | -1.75               | AW083937         | Arylacetamide deacetylase-like 1                                                  |
| GE55964   | FBXO3                   | 0.013   | -1.75               | NM_012175        | F-box protein 3                                                                   |
| GE85086   | IFT122                  | 0.036   | -1.74               | R97233           | Intraflagellar transport 122 homolog (Chlamydomonas)                              |
| GE501186  | FLJ36166                | 0.047   | -1.74               | N34516           | Hypothetical protein FLJ36166                                                     |
| GE88165   | RPS16                   | 0.046   | -1.74               | AI749553         | Ribosomal protein S16                                                             |
| GE82736   | NT5DC2                  | 0.046   | -1.74               | AW580268         | Hypothetical protein FLJ12442                                                     |
| GE61120   | ENTPD4                  | 0.010   | -1.74               | CA412561         | Ectonucleoside triphosphate diphosphohydrolase 4                                  |

| Column ID | Symbol       | p-value | FC(AI delet vs. NI) | Accession number | Description                                                                      |
|-----------|--------------|---------|---------------------|------------------|----------------------------------------------------------------------------------|
| GE702466  | CAPS2        | 0.009   | -1.74               | BE465261         | calcyphosine 2                                                                   |
| GE828728  | SBF2         | 0.022   | -1.74               | BQ022721         | SET binding factor 2                                                             |
| GE601688  | CTNNA3       | 0.046   | -1.74               | AW975030         | Catenin (cadherin-associated protein), alpha 3                                   |
| GE85506   | DOCK7        | 0.035   | -1.74               | AK125049         | dedicator of cytokinesis 7                                                       |
| GE603785  | IL28RA       | 0.045   | -1.73               | A1832093         | Interleukin 28 receptor, alpha (interferon, lambda receptor)                     |
| GE582873  | RASA3        | 0.048   | -1.73               | AW172526         | RAS p21 protein activator 3                                                      |
| GE898723  | XAGE5        | 0.045   | -1.73               | NM_130775        | X antigen family, member 5                                                       |
| GE59231   | ARFIP2       | 0.025   | -1.73               | NM_012402        | ADP-ribosylation factor interacting protein 2 (arfaptin 2)                       |
| GE61909   | HIPK3        | 0.016   | -1.73               | AA805539         | Homeodomain interacting protein kinase 3                                         |
| GE85937   | RPS9         | 0.031   | -1.73               | NM_001013        | ribosomal protein S9                                                             |
| GE813074  | OSBPL9       | 0.030   | -1.73               | AW968210         | oxysterol binding protein-like 9                                                 |
| GE79735   | HIPK3        | 0.045   | -1.73               | NM_005734        | homeodomain interacting protein kinase 3                                         |
| GE628878  | HCG2045614   | 0.032   | -1.72               | BX412503         | hCG2045614                                                                       |
| GE59479   | TSG101       | 0.009   | -1.72               | NM_006292        | tumor susceptibility gene 101                                                    |
| GE56704   | C15ORF55     | 0.018   | -1.72               | BX117628         | Nuclear protein in testis                                                        |
| GE740874  | ASB4         | 0.021   | -1.72               | A1457276         | Ankyrin repeat and SOCS box-containing 4                                         |
| GE495153  | LOC100130988 | 0.038   | -1.72               | BQ420400         | Hypothetical LOC392670                                                           |
| GE546379  | DENND2C      | 0.007   | -1.72               | NM_198459        | DENN/MADD domain containing 2C                                                   |
| GE88765   | CPA4         | 0.029   | -1.72               | BE156039         | Carboxypeptidase A4                                                              |
| GE471415  | LOC400456    | 0.013   | -1.72               | BC040875         | hypothetical gene supported by BC040875                                          |
| GE707785  | DTWD2        | 0.041   | -1.72               | H29590           | ym61a05.s1 Soares infant brain 1NIB Homo sapiens cDNA clone IMAGE:52642 3', mRNA |
| GE558951  | C11ORF46     | 0.008   | -1.72               | NM_152316        | chromosome 11 open reading frame 46                                              |
| GE662608  | BHLHB8       | 0.040   | -1.72               | A1434186         | basic helix-loop-helix domain containing, class B, 8                             |
| GE55821   | PLEKHA5      | 0.025   | -1.71               | NM_019012        | pleckstrin homology domain containing, family A member 5                         |
| GE86316   | GAL3ST4      | 0.007   | -1.71               | NM_024637        | galactose-3-O-sulfotransferase 4                                                 |
| GE603405  | NFE2L3       | 0.028   | -1.71               | AA534197         | nuclear factor (erythroid-derived 2)-like 3                                      |
| GE56532   | TAF3         | 0.023   | -1.71               | BQ441483         | TAF3 RNA polymerase II, TATA box binding protein (TBP)-associated factor, 140kDa |
| GE661640  | GIPC3        | 0.029   | -1.71               | AK098244         | CDNA FLJ40925 fis, clone UTERU2006486                                            |
| GE87615   | ZCCHC7       | 0.002   | -1.71               | NM_032226        | zinc finger, CCHC domain containing 7                                            |
| GE774968  | ATP8B3       | 0.048   | -1.71               | BC033179         | ATPase, Class I, type 8B, member 3                                               |
| GE898045  | C8ORF46      | 0.048   | -1.71               | NM_152765        | chromosome 8 open reading frame 46                                               |
| GE79868   | EEF1A1       | 0.004   | -1.71               | BF170701         | Eukaryotic translation elongation factor 1 alpha 1                               |
| GE53082   | NACAD        | 0.041   | -1.71               | BU543827         | KIAA0363 protein                                                                 |
| GE503894  | ST8SIA6      | 0.029   | -1.71               | AW002415         | ST8 alpha-N-acetyl-neuraminide alpha-2,8-sialyltransferase 6                     |
| GE789836  | ARFGEF2      | 0.011   | -1.70               | A1343519         | ADP-ribosylation factor guanine nucleotide-exchange factor 2 (brefeldin A-inhibi |
| GE580123  | SYT9         | 0.048   | -1.70               | BM553771         | Synaptotagmin IX                                                                 |
| GE62288   | GPR68        | 0.036   | -1.70               | NM_003485        | G protein-coupled receptor 68                                                    |
| GE80282   | L2HGDH       | 0.032   | -1.70               | NM_024884        | L-2-hydroxyglutarate dehydrogenase                                               |
| GE57425   | CTDSPL       | 0.030   | -1.70               | NM_005808        | CTD (carboxy-terminal domain, RNA polymerase II, polypeptide A) small phosphatas |
| GE61961   | AGPAT4       | 0.036   | -1.70               | NM_020133        | 1-acylglycerol-3-phosphate O-acyltransferase 4 (lysophosphatidic acid acyltransf |
| GE88595   | DGKH         | 0.023   | -1.70               | AA722077         | Diacylglycerol kinase, eta                                                       |
| GE86442   | TTC17        | 0.016   | -1.70               | NM_018259        | tetratricopeptide repeat domain 17                                               |
| GE57559   | CYP4A11      | 0.011   | -1.70               | NM_000778        | cytochrome P450, family 4, subfamily A, polypeptide 11                           |
| GE54338   | CREBL2       | 0.011   | -1.70               | NM_001310        | cAMP responsive element binding protein-like 2                                   |
| GE571158  | FAM151A      | 0.039   | -1.70               | NM_176782        | chromosome 1 open reading frame 179                                              |
| GE79433   | C12ORF53     | 0.028   | -1.70               | NM_153685        | hypothetical protein DKFZp547D2210                                               |
| GE56755   | ZBED5        | 0.009   | -1.69               | NM_021211        | transposon-derived Buster1 transposase-like protein gene                         |
| GE86065   | RBM33        | 0.019   | -1.69               | AL137724         | proline rich 8                                                                   |

| Column ID | Symbol    | p-value | FC(AI delet vs. NI) | Accession number | Description                                                                      |
|-----------|-----------|---------|---------------------|------------------|----------------------------------------------------------------------------------|
| GE631533  | MAML3     | 0.019   | -1.69               | AK124941         | Mastermind-like 3 (Drosophila)                                                   |
| GE55454   | WDR40A    | 0.006   | -1.69               | NM_015397        | WD repeat domain 40A                                                             |
| GE84191   | LOC132241 | 0.037   | -1.69               | AL117606         | hypothetical protein LOC132241                                                   |
| GE82062   | UBE2J1    | 0.016   | -1.69               | NM_016021        | ubiquitin-conjugating enzyme E2, J1 (UBC6 homolog, yeast)                        |
| GE748175  | MACF1     | 0.028   | -1.68               | BF994533         | Microtubule-actin crosslinking factor 1                                          |
| GE687965  | INVS      | 0.012   | -1.68               | A1371988         | Inversin                                                                         |
| GE721094  | ALKBH3    | 0.024   | -1.68               | AV763865         | Hypothetical protein LOC221120                                                   |
| GE60253   | NUP88     | 0.017   | -1.68               | NM_002532        | nucleoporin 88kDa                                                                |
| GE86029   | SFTPB     | 0.025   | -1.68               | NM_000542        | surfactant, pulmonary-associated protein B                                       |
| GE83213   | HNRNPA1   | 0.016   | -1.68               | NM_002136        | heterogeneous nuclear ribonucleoprotein A1                                       |
| GE59362   | FUBP3     | 0.021   | -1.68               | U69127           | far upstream element (FUSE) binding protein 3                                    |
| GE532986  | TRPC1     | 0.046   | -1.68               | BF949171         | Transient receptor potential cation channel, subfamily C, member 1               |
| GE58976   | SLC1A6    | 0.047   | -1.68               | NM_005071        | solute carrier family 1 (high affinity aspartate/glutamate transporter), member  |
| GE56485   | DNAJC27   | 0.027   | -1.68               | NM_016544        | Ras-associated protein Rap1                                                      |
| GE488651  | DIDO1     | 0.043   | -1.68               | NM_022105        | death inducer-oblierator 1                                                       |
| GE56549   | RASSF8    | 0.024   | -1.67               | CF455785         | Ras association (RalGDS/AF-6) domain family 8                                    |
| GE59245   | GPR19     | 0.024   | -1.67               | NM_006143        | G protein-coupled receptor 19                                                    |
| GE59137   | PDE1C     | 0.034   | -1.67               | NM_005020        | phosphodiesterase 1C, calmodulin-dependent 70kDa                                 |
| GE54580   | PSIP1     | 0.003   | -1.67               | NM_033222        | PC4 and SFRS1 interacting protein 1                                              |
| GE705695  | TNFRSF21  | 0.019   | -1.67               | A1922677         | Tumor necrosis factor receptor superfamily, member 21                            |
| GE56062   | RPL3      | 0.025   | -1.67               | CD686625         | Full-length cDNA clone CS0DK002YP16 of HeLa cells Cot 25-normalized of Homo sapi |
| GE53145   | SOCS6     | 0.029   | -1.67               | NM_004232        | suppressor of cytokine signaling 6                                               |
| GE79354   | OMA1      | 0.013   | -1.67               | NM_145243        | OMA1 homolog, zinc metallopeptidase (S. cerevisiae)                              |
| GE55630   | APBB1IP   | 0.030   | -1.67               | NM_019043        | amyloid beta (A4) precursor protein-binding, family B, member 1 interacting prot |
| GE79890   | GDI2      | 0.009   | -1.67               | NM_001494        | GDP dissociation inhibitor 2                                                     |
| GE886197  | DUSP8     | 0.050   | -1.67               | BG254553         | Dual specificity phosphatase 8                                                   |
| GE804880  | ARID5B    | 0.022   | -1.67               | AL832681         | AT rich interactive domain 5B (MRF1-like)                                        |
| GE725201  | XIST      | 0.039   | -1.66               | BQ369419         | X (inactive)-specific transcript                                                 |
| GE776426  | EPHA10    | 0.003   | -1.66               | BC041360         | EPH receptor A10                                                                 |
| GE61380   | RPS5      | 0.046   | -1.66               | NM_001009        | ribosomal protein S5                                                             |
| GE88596   | FCN1      | 0.005   | -1.66               | BX644928         | Ficolin (collagen/fibrinogen domain containing) 1                                |
| GE795573  | SHB       | 0.036   | -1.66               | AK055947         | hypothetical protein LOC158230                                                   |
| GE54070   | CDK2AP1   | 0.032   | -1.66               | NM_004642        | CDK2-associated protein 1                                                        |
| GE84031   | PDE9A     | 0.031   | -1.66               | AB017602         | phosphodiesterase 9A                                                             |
| GE484897  | UBQLN3    | 0.020   | -1.66               | NM_017481        | ubiquilin 3                                                                      |
| GE80669   | CRYBA4    | 0.043   | -1.65               | NM_001886        | crystallin, beta A4                                                              |
| GE84383   | TUBB1     | 0.030   | -1.65               | AA402364         | Tubulin, beta 1                                                                  |
| GE53121   | SOCS7     | 0.043   | -1.65               | BX105723         | Suppressor of cytokine signaling 7                                               |
| GE518563  | FLJ44087  | 0.027   | -1.65               | AI147392         | Hypothetical protein LOC284263                                                   |
| GE63225   | CCBL2     | 0.044   | -1.65               | R48038           | RNA binding motif protein, X-linked-like 1                                       |
| GE80919   | FUT2      | 0.028   | -1.65               | D87942           | fucosyltransferase 2 (secretor status included)                                  |
| GE674318  | DLEU2     | 0.040   | -1.65               | AA648984         | Deleted in lymphocytic leukemia, 2                                               |
| GE58881   | SLC4A3    | 0.041   | -1.65               | NM_005070        | solute carrier family 4, anion exchanger, member 3                               |
| GE85851   | KIFC3     | 0.028   | -1.65               | AV654547         | AV654547 GLC Homo sapiens cDNA clone GLCDXA02 3', mRNA sequence.                 |
| GE57736   | GCLM      | 0.007   | -1.65               | NM_002061        | glutamate-cysteine ligase, modifier subunit                                      |
| GE849549  | LONRF2    | 0.001   | -1.64               | BM675650         | Transcribed locus                                                                |
| GE810779  | C6ORF199  | 0.039   | -1.64               | NM_145025        | chromosome 6 open reading frame 199                                              |
| GE815456  | HS2ST1    | 0.046   | -1.64               | W45350           | CDNA FLJ46011 fis, clone SPLEN2007314                                            |

| Column ID | Symbol                  | p-value | FC(AI delet vs. NI) | Accession number | Description                                                                      |
|-----------|-------------------------|---------|---------------------|------------------|----------------------------------------------------------------------------------|
| GE54459   | RAB6A                   | 0.014   | -1.64               | NM_002869        | RAB6A, member RAS oncogene family                                                |
| GE83485   | SUV420H2                | 0.002   | -1.64               | NM_032701        | suppressor of variegation 4-20 homolog 2 (Drosophila)                            |
| GE482434  | KALRN                   | 0.033   | -1.64               | A1275610         | Kalirin, RhoGEF kinase                                                           |
| GE723695  | EPS15                   | 0.024   | -1.64               | BX093454         | Epidermal growth factor receptor pathway substrate 15                            |
| GE81768   | EIF2C1                  | 0.024   | -1.64               | NM_012199        | eukaryotic translation initiation factor 2C, 1                                   |
| GE474773  | SH2D6                   | 0.047   | -1.64               | NM_198482        | similar to B-cell linker; B cell linker protein                                  |
| GE497938  | CXORF48                 | 0.023   | -1.64               | AW295025         | chromosome X open reading frame 48                                               |
| GE59728   | ACP2                    | 0.014   | -1.63               | NM_001610        | acid phosphatase 2, lysosomal                                                    |
| GE834484  | TIAM1                   | 0.030   | -1.63               | BQ024652         | T-cell lymphoma invasion and metastasis 1                                        |
| GE808538  | LOC339298               | 0.040   | -1.63               | BC043002         | hypothetical protein LOC339298                                                   |
| GE524452  | NKAIN2                  | 0.017   | -1.63               | BX115655         | Na <sup>+</sup> /K <sup>+</sup> transporting ATPase interacting 2                |
| GE485502  | C12ORF60                | 0.042   | -1.63               | NM_175874        | hypothetical protein MGC47869                                                    |
| GE541217  | HM13                    | 0.028   | -1.63               | AA570696         | Histocompatibility (minor) 13                                                    |
| GE80154   | TTC6                    | 0.025   | -1.63               | BX161415         | tetratricopeptide repeat domain 6                                                |
| GE844649  | MGRN1                   | 0.026   | -1.63               | BU742896         | Mahogunin, ring finger 1                                                         |
| GE491531  | RYR2                    | 0.038   | -1.62               | AA719296         | Ryanodine receptor 2 (cardiac)                                                   |
| GE54440   | 15-Sep                  | 0.017   | -1.62               | NM_004261        | 15 kDa selenoprotein                                                             |
| GE87299   | TPRG1L                  | 0.004   | -1.62               | NM_182752        | family with sequence similarity 79, member A                                     |
| GE495865  | ZAK                     | 0.033   | -1.62               | A1283196         | Hypothetical protein LOC339751                                                   |
| GE473289  | MRVII                   | 0.006   | -1.62               | A1150346         | Murine retrovirus integration site 1 homolog                                     |
| GE617069  | TEAD2                   | 0.047   | -1.62               | CB049347         | TEA domain family member 2                                                       |
| GE78955   | RPS15A                  | 0.025   | -1.61               | AA010849         | Chromosome 20 open reading frame 19                                              |
| GE55991   | C3ORF59                 | 0.033   | -1.61               | NM_178496        | similar to BcDNA:GH11415 gene product                                            |
| GE87813   | AGK                     | 0.004   | -1.61               | BE694349         | Multiple substrate lipid kinase                                                  |
| GE611594  | SLC2A9                  | 0.042   | -1.61               | AK025887         | solute carrier family 2 (facilitated glucose transporter), member 9              |
| GE56221   | PIK3C2A                 | 0.025   | -1.61               | D62281           | Phosphoinositide-3-kinase, class 2, alpha polypeptide                            |
| GE578880  | ANKRD43                 | 0.020   | -1.61               | NM_175873        | ankyrin repeat domain 43                                                         |
| GE82717   | C1ORF149                | 0.036   | -1.61               | NM_022756        | chromosome 1 open reading frame 149                                              |
| GE885455  | F8A1                    | 0.023   | -1.61               | BM722299         | Coagulation factor VIII-associated (intronic transcript) 1                       |
| GE61363   | EEFIG                   | 0.007   | -1.60               | AA225828         | Eukaryotic translation elongation factor 1 gamma                                 |
| GE85099   | IARS                    | 0.021   | -1.60               | W03062           | Isoleucine-tRNA synthetase                                                       |
| GE53425   | FZD1                    | 0.015   | -1.60               | NM_003505        | frizzled homolog 1 (Drosophila)                                                  |
| GE528433  | C9ORF163                | 0.021   | -1.60               | NM_152571        | hypothetical protein FLJ36779                                                    |
| GE83441   | SPINK7                  | 0.008   | -1.60               | NM_032566        | esophagus cancer-related gene-2                                                  |
| GE54017   | HNRNPR                  | 0.019   | -1.60               | NM_005826        | heterogeneous nuclear ribonucleoprotein R                                        |
| GE82355   | RSBN1                   | 0.013   | -1.60               | NM_018364        | round spermatid basic protein 1                                                  |
| GE623510  | EEFIG                   | 0.009   | -1.60               | BI489517         | Coiled-coil-helix-coiled-coil-helix domain containing 3                          |
| GE813317  | ITFG1                   | 0.047   | -1.59               | BX114982         | Transcribed locus, weakly similar to XP_528662.1 PREDICTED: similar to Immunoglo |
| GE842776  | GNA12                   | 0.017   | -1.59               | BF515137         | Guanine nucleotide binding protein (G protein) alpha 12                          |
| GE81658   | API5                    | 0.004   | -1.59               | NM_006595        | apoptosis inhibitor 5                                                            |
| GE79756   | NUP160                  | 0.004   | -1.59               | BF968999         | Nucleoporin 160kDa                                                               |
| GE837902  | ZNF605                  | 0.023   | -1.59               | BQ003590         | Zinc finger protein 605                                                          |
| GE60153   | ZNF74                   | 0.032   | -1.59               | NM_003426        | zinc finger protein 74 (Cos52)                                                   |
| GE56237   | RSBN1                   | 0.041   | -1.59               | D61092           | Round spermatid basic protein 1                                                  |
| GE652276  | UBE2U                   | 0.041   | -1.59               | BX116499         | Ubiquitin-conjugating enzyme E2U (putative)                                      |
| GE887158  | SEC24C(includesEG:9632) | 0.017   | -1.59               | BE737711         | SEC24 family, member C (S. cerevisiae)                                           |
| GE61315   | RPL5                    | 0.032   | -1.59               | AA814425         | Similar to ribosomal protein L5; 60S ribosomal protein L5                        |
| GE88640   | SAP130                  | 0.027   | -1.59               | NM_024545        | mSin3A-associated protein 130                                                    |



| Column ID | Symbol    | p-value | FC(AI delet vs. NI) | Accession number | Description                                                            |
|-----------|-----------|---------|---------------------|------------------|------------------------------------------------------------------------|
| GE55229   | NXF1      | 0.032   | -1.59               | NM_006362        | nuclear RNA export factor 1                                            |
| GE55376   | FBXL5     | 0.030   | -1.58               | NM_012161        | F-box and leucine-rich repeat protein 5                                |
| GE53567   | KIAA0895  | 0.012   | -1.58               | BI260221         | KIAA0895 protein                                                       |
| GE58315   | SOCS2     | 0.040   | -1.58               | NM_003877        | suppressor of cytokine signaling 2                                     |
| GE81110   | GNAQ      | 0.001   | -1.58               | CD644251         | Guanine nucleotide binding protein (G protein), q polypeptide          |
| GE504590  | PEAR1     | 0.034   | -1.58               | AK074121         | platelet endothelial aggregation receptor 1                            |
| GE57951   | XRCC1     | 0.011   | -1.58               | NM_006297        | X-ray repair complementing defective repair in Chinese hamster cells 1 |
| GE55097   | CMIP      | 0.046   | -1.58               | R05960           | C-Maf-inducing protein                                                 |
| GE497098  | FCRL3     | 0.006   | -1.58               | A1376616         | Fc receptor-like 3                                                     |
| GE615394  | GPC3      | 0.017   | -1.57               | R94486           | glypican 3                                                             |
| GE87033   | C9ORF45   | 0.034   | -1.57               | NM_030814        | chromosome 9 open reading frame 45                                     |
| GE801862  | FAM40B    | 0.020   | -1.57               | CA389993         | Family with sequence similarity 40, member B                           |
| GE81887   | FLJ35390  | 0.021   | -1.57               | AV743061         | Hypothetical protein FLJ35390                                          |
| GE83085   | IFT74     | 0.038   | -1.57               | NM_025103        | intraflagellar transport 74 homolog (Chlamydomonas)                    |
| GE515480  | BMPR1A    | 0.025   | -1.57               | NM_004329        | bone morphogenetic protein receptor, type IA                           |
| GE839787  | AGFG2     | 0.042   | -1.57               | BF512495         | Insulin receptor substrate 3-like                                      |
| GE777701  | SBF1      | 0.023   | -1.57               | CF142366         | SET binding factor 1                                                   |
| GE495671  | DR1       | 0.019   | -1.56               | A1887658         | down-regulator of transcription 1, TBP-binding (negative cofactor 2)   |
| GE79925   | RPL7      | 0.039   | -1.56               | NM_000971        | ribosomal protein L7                                                   |
| GE886128  | CD81      | 0.033   | -1.56               | BM908449         | CD81 antigen (target of antiproliferative antibody 1)                  |
| GE80563   | EPHA7     | 0.005   | -1.56               | NM_004440        | EPH receptor A7                                                        |
| GE628244  | FMNL2     | 0.043   | -1.56               | BX108588         | Formin-like 2                                                          |
| GE88845   | OR52D1    | 0.031   | -1.56               | AC087380         | Homo sapiens chromosome 11, clone RP11-454O22, complete sequence.      |
| GE884498  | C14ORF179 | 0.039   | -1.56               | BQ924814         | MGC16028 similar to RIKEN cDNA 1700019E19 gene                         |
| GE844576  | FCHSD2    | 0.028   | -1.56               | AA875908         | FCH and double SH3 domains 2                                           |
| GE82466   | RHOF      | 0.038   | -1.56               | NM_019034        | ras homolog gene family, member F (in filopodia)                       |
| GE83363   | FYTDD1    | 0.029   | -1.55               | NM_032288        | forty-two-three domain containing 1                                    |
| GE87075   | UEVLD     | 0.016   | -1.55               | NM_018314        | ubiquitin-conjugating enzyme E2-like                                   |
| GE750714  | CYP2R1    | 0.022   | -1.55               | BF869225         | Cytochrome P450, family 2, subfamily R, polypeptide 1                  |
| GE890135  | EEFIG     | 0.045   | -1.55               | BE394491         | Coiled-coil-helix-coiled-coil-helix domain containing 3                |
| GE470947  | RPL38     | 0.019   | -1.55               | BC007982         | hypothetical protein MGC16275                                          |
| GE526314  | ZNF518A   | 0.049   | -1.55               | BU075986         | Zinc finger protein 518                                                |
| GE54559   | ZNF205    | 0.049   | -1.55               | NM_003456        | zinc finger protein 205                                                |
| GE59624   | HCCA2     | 0.008   | -1.55               | NM_053005        | HCCA2 protein                                                          |
| GE61957   | FKBP9L    | 0.031   | -1.54               | BX283612         | FK506 binding protein 9-like                                           |
| GE54829   | TRIM33    | 0.014   | -1.54               | NM_015906        | tripartite motif-containing 33                                         |
| GE508275  | RPL11     | 0.032   | -1.54               | BE934844         | RC2-LT0007-300800-013-c09 LT0007 Homo sapiens cDNA, mRNA sequence.     |
| GE56037   | STRBP     | 0.006   | -1.54               | NM_018387        | spermatid perinuclear RNA binding protein                              |
| GE62867   | GNA12     | 0.005   | -1.54               | BE389395         | Guanine nucleotide binding protein (G protein) alpha 12                |
| GE79512   | ETS2      | 0.043   | -1.54               | NM_005239        | v-ets erythroblastosis virus E26 oncogene homolog 2 (avian)            |
| GE59820   | PNPLA2    | 0.014   | -1.54               | AA764777         | Patatin-like phospholipase domain containing 2                         |
| GE671576  | LOC149401 | 0.021   | -1.54               | A1652864         | Similar to SLIT-ROBO Rho GTPase activating protein 2                   |
| GE87760   | METTL9    | 0.044   | -1.54               | NM_016025        | DORA reverse strand protein 1                                          |
| GE85185   | EYA3      | 0.039   | -1.53               | AA449710         | eyes absent homolog 3 (Drosophila)                                     |
| GE825382  | EIF4EBP2  | 0.042   | -1.53               | BM450361         | Eukaryotic translation initiation factor 4E binding protein 2          |
| GE58923   | C11ORF41  | 0.049   | -1.53               | U10991           | chromosome 11 open reading frame 41                                    |
| GE777422  | FLJ45537  | 0.012   | -1.53               | BX097894         | FLJ45537 protein                                                       |
| GE80227   | WHSC1     | 0.045   | -1.53               | NM_133334        | Wolf-Hirschhorn syndrome candidate 1                                   |

| Column ID | Symbol       | p-value | FC(AI delet vs. NI) | Accession number | Description                                                                      |
|-----------|--------------|---------|---------------------|------------------|----------------------------------------------------------------------------------|
| GE580588  | KRT37        | 0.006   | -1.53               | NM_003770        | keratin, hair, acidic, 7                                                         |
| GE796638  | TRIM37       | 0.031   | -1.53               | A1792525         | Tripartite motif-containing 37                                                   |
| GE81574   | MC5R         | 0.039   | -1.53               | NM_005913        | melanocortin 5 receptor                                                          |
| GE744809  | MYLK4        | 0.050   | -1.53               | AK096893         | Homo sapiens cDNA FLJ39574 fis, clone SKMUS2002693.                              |
| GE765146  | APP          | 0.002   | -1.53               | CB053621         | Amyloid beta (A4) precursor protein (peptidase nexin-II, Alzheimer disease)      |
| GE55205   | PHTF1        | 0.038   | -1.53               | NM_006608        | putative homeodomain transcription factor 1                                      |
| GE86694   | SBDS         | 0.021   | -1.52               | AW853976         | Shwachman-Bodian-Diamond syndrome                                                |
| GE58443   | MAN1B1       | 0.014   | -1.52               | NM_007230        | synonym: MANA-ER; endoplasmic reticulum alpha-mannosidase 1; endoplasmic reticul |
| GE56491   | RPRD1B       | 0.047   | -1.52               | NM_021215        | chromosome 20 open reading frame 77                                              |
| GE81602   | NEUROG1      | 0.004   | -1.52               | NM_006161        | neurogenin 1                                                                     |
| GE58814   | INA          | 0.032   | -1.52               | NM_032727        | internexin neuronal intermediate filament protein, alpha                         |
| GE527682  | IFLTD1       | 0.013   | -1.52               | NM_152590        | likely ortholog of mouse Pas1 candidate 1                                        |
| GE79640   | VCP          | 0.020   | -1.51               | BM853854         | Valosin-containing protein                                                       |
| GE53755   | WBP11        | 0.042   | -1.51               | NM_016312        | WW domain binding protein 11                                                     |
| GE58938   | GABPA        | 0.028   | -1.51               | NM_002040        | GA binding protein transcription factor, alpha subunit 60kDa                     |
| GE82706   | C14ORF135    | 0.037   | -1.51               | NM_022495        | chromosome 14 open reading frame 135                                             |
| GE61175   | EIF3H        | 0.032   | -1.51               | NM_003756        | eukaryotic translation initiation factor 3, subunit 3 gamma, 40kDa               |
| GE510120  | C17ORF66     | 0.027   | -1.51               | NM_152781        | chromosome 17 open reading frame 66                                              |
| GE88449   | HSF1         | 0.003   | -1.51               | BG983163         | Heat shock transcription factor 1                                                |
| GE472290  | FBXL4        | 0.033   | -1.51               | AK055220         | F-box and leucine-rich repeat protein 4                                          |
| GE62332   | ADAMTS8      | 0.032   | -1.51               | NM_007037        | ADAM metalloproteinase with thrombospondin type 1 motif, 8                       |
| GE59063   | METAP2       | 0.007   | -1.51               | NM_006838        | methionyl aminopeptidase 2                                                       |
| GE769330  | ASCC1        | 0.040   | -1.50               | AA632993         | nq11h09.s1 NCL_CGAP_Thy1 Homo sapiens cDNA clone IMAGE:1143617 similar to contai |
| GE56185   | TM9SF4       | 0.000   | -1.50               | NM_014742        | transmembrane 9 superfamily protein member 4                                     |
| GE55406   | TASP1        | 0.005   | -1.50               | NM_017714        | taspace, threonine aspartase, 1                                                  |
| GE866382  | PTK2         | 0.022   | -1.50               | BF509623         | PTK2 protein tyrosine kinase 2                                                   |
| GE79894   | EFNA3        | 0.038   | 1.50                | NM_004952        | ephrin-A3                                                                        |
| GE80240   | ZNF558       | 0.020   | 1.50                | NM_144693        | zinc finger protein 558                                                          |
| GE83432   | NT5DC1       | 0.026   | 1.50                | NM_032519        | synonyms: LP2642, C6orf200, MGC24302, MGC131837; chromosome 6 open reading frame |
| GE83501   | LMNB2        | 0.038   | 1.50                | NM_032737        | lamin B2                                                                         |
| GE59645   | ADA          | 0.028   | 1.50                | NM_000022        | adenosine deaminase                                                              |
| GE81591   | TNIP1        | 0.026   | 1.51                | NM_006058        | TNFAIP3 interacting protein 1                                                    |
| GE83513   | KPNA4        | 0.003   | 1.51                | NM_002268        | karyopherin alpha 4 (importin alpha 3)                                           |
| GE62221   | MAPKAPK3     | 0.036   | 1.51                | NM_004635        | mitogen-activated protein kinase-activated protein kinase 3                      |
| GE81165   | NFYA         | 0.017   | 1.51                | NM_002505        | nuclear transcription factor Y, alpha                                            |
| GE54320   | STX6         | 0.043   | 1.51                | BE766470         | Syntaxin 6                                                                       |
| GE54657   | FAM172A      | 0.030   | 1.51                | NM_032042        | hypothetical protein DKFZp564D172                                                |
| GE789668  | STXBP5       | 0.031   | 1.51                | BX116201         | CDNA FLJ43226 fis, clone HCASM2009588                                            |
| GE487925  | LOC100128434 | 0.040   | 1.51                | AK091251         | CDNA FLJ33932 fis, clone CTONG2017798                                            |
| GE57805   | NR3C1        | 0.006   | 1.51                | BF055517         | Nuclear receptor subfamily 3, group C, member 1 (glucocorticoid receptor)        |
| GE753302  | LIPA         | 0.046   | 1.52                | BC040833         | Lipase A, lysosomal acid, cholesterol esterase (Wolman disease)                  |
| GE62186   | RRAGD        | 0.021   | 1.52                | NM_021244        | Ras-related GTP binding D                                                        |
| GE86450   | UNKL         | 0.024   | 1.52                | NM_023076        | chromosome 16 open reading frame 28                                              |
| GE624984  | SATB1        | 0.038   | 1.52                | AK124253         | SATB homeobox 1                                                                  |
| GE478916  | MIER3        | 0.038   | 1.52                | AW780232         | DKFZP78111119 hypothetical protein                                               |
| GE57204   | GPD1L        | 0.018   | 1.52                | NM_015141        | glycerol-3-phosphate dehydrogenase 1-like                                        |
| GE847026  | RRAGD        | 0.043   | 1.52                | BQ030086         | Ras-related GTP binding D                                                        |
| GE513651  | ZNF431       | 0.015   | 1.53                | NM_133473        | zinc finger protein 431                                                          |

| Column ID | Symbol    | p-value | FC(AI delet vs. NI) | Accession number | Description                                                                      |
|-----------|-----------|---------|---------------------|------------------|----------------------------------------------------------------------------------|
| GE61524   | NEDD8     | 0.025   | 1.53                | BG826796         | Neural precursor cell expressed, developmentally down-regulated 8                |
| GE718609  | ACTR1B    | 0.005   | 1.53                | BX119702         | ARP1 actin-related protein 1 homolog B, centractin beta (yeast)                  |
| GE635882  | TUBB2A    | 0.048   | 1.53                | A1864693         | Tubulin, beta 2A                                                                 |
| GE88694   | C1ORF216  | 0.050   | 1.53                | NM_152374        | hypothetical protein FLJ38984                                                    |
| GE83456   | GTPBP3    | 0.046   | 1.53                | NM_032620        | GTP binding protein 3 (mitochondrial)                                            |
| GE62446   | POLQ      | 0.026   | 1.53                | NM_006596        | polymerase (DNA directed), theta                                                 |
| GE59614   | PGK1      | 0.035   | 1.53                | NM_000291        | phosphoglycerate kinase 1                                                        |
| GE684260  | DMTF1     | 0.021   | 1.54                | H29027           | Hypothetical LOC401385                                                           |
| GE651707  | UHRF1BP1L | 0.022   | 1.54                | R39803           | KIAA0701 protein                                                                 |
| GE79571   | MAP4K2    | 0.025   | 1.54                | NM_004579        | mitogen-activated protein kinase kinase kinase kinase 2                          |
| GE59544   | BTN3A1    | 0.010   | 1.54                | NM_007048        | butyrophilin, subfamily 3, member A1                                             |
| GE806822  | LOC645212 | 0.042   | 1.54                | BU150787         | Transcribed locus                                                                |
| GE54621   | NIT1      | 0.001   | 1.54                | NM_005600        | nitrilase 1                                                                      |
| GE490349  | C3ORF17   | 0.012   | 1.54                | AA436214         | Chromosome 3 open reading frame 17                                               |
| GE551600  | WDR90     | 0.029   | 1.54                | NM_145294        | similar to RIKEN cDNA 3230401M21 [Mus musculus]                                  |
| GE57308   | KNTC1     | 0.006   | 1.54                | NM_014708        | kinetochore associated 1                                                         |
| GE59733   | ODC1      | 0.039   | 1.55                | NM_002539        | ornithine decarboxylase 1                                                        |
| GE80915   | UBE3A     | 0.028   | 1.55                | NM_000462        | ubiquitin protein ligase E3A (human papilloma virus E6-associated protein, Angel |
| GE53268   | MGRN1     | 0.045   | 1.55                | D30926           | Mahogunin, ring finger 1                                                         |
| GE58513   | ANKRD11   | 0.039   | 1.55                | BG108845         | Ankyrin repeat domain 11                                                         |
| GE833939  | ARHGAP26  | 0.022   | 1.55                | BQ011167         | Rho GTPase activating protein 26                                                 |
| GE62404   | C7ORF27   | 0.016   | 1.55                | NM_152743        | chromosome 7 open reading frame 27                                               |
| GE61197   | ATP6V0C   | 0.042   | 1.55                | BM822797         | ATPase, H+ transporting, lysosomal 16kDa, V0 subunit c                           |
| GE53907   | FAM44A    | 0.005   | 1.56                | W68261           | KIAA1327 protein                                                                 |
| GE58907   | JAK3      | 0.020   | 1.56                | NM_000215        | Janus kinase 3 (a protein tyrosine kinase, leukocyte)                            |
| GE80351   | NARFL     | 0.036   | 1.56                | NM_022493        | nuclear prelamin A recognition factor-like                                       |
| GE62286   | UXS1      | 0.037   | 1.56                | NM_025076        | UDP-glucuronate decarboxylase 1                                                  |
| GE892360  | ZNF714    | 0.008   | 1.56                | BC050468         | hypothetical protein LOC148206                                                   |
| GE56453   | TJAP1     | 0.009   | 1.56                | NM_080604        | tight junction associated protein 1 (peripheral)                                 |
| GE57490   | FDXR      | 0.030   | 1.56                | NM_004110        | ferredoxin reductase                                                             |
| GE58555   | ATAD2     | 0.034   | 1.57                | NM_014109        | ATPase family, AAA domain containing 2                                           |
| GE591164  | ZNF530    | 0.020   | 1.57                | BX106478         | zinc finger protein 530                                                          |
| GE87448   | PANK3     | 0.032   | 1.57                | NM_024594        | pantothenate kinase 3                                                            |
| GE81922   | LAT       | 0.002   | 1.57                | NM_014387        | linker for activation of T cells                                                 |
| GE57992   | NFKB1     | 0.007   | 1.58                | NM_003998        | nuclear factor of kappa light polypeptide gene enhancer in B-cells 1 (p105)      |
| GE87089   | USP36     | 0.020   | 1.58                | A1766835         | Ubiquitin specific peptidase 36                                                  |
| GE60200   | POLG      | 0.002   | 1.58                | A1890083         | KIAA1794                                                                         |
| GE564215  | IDH3A     | 0.023   | 1.58                | AA769577         | isocitrate dehydrogenase 3 (NAD+) alpha                                          |
| GE81070   | CDK2      | 0.043   | 1.58                | NM_001798        | cyclin-dependent kinase 2                                                        |
| GE59469   | SNRPN     | 0.043   | 1.58                | BX090300         | Small nuclear ribonucleoprotein polypeptide N                                    |
| GE737071  | PLXNC1    | 0.045   | 1.58                | A1829674         | Plexin C1                                                                        |
| GE82118   | NOP16     | 0.037   | 1.58                | NM_016391        | hypothetical protein HSPC111                                                     |
| GE83571   | ATG4D     | 0.026   | 1.59                | N39115           | Hypothetical protein FLJ12949                                                    |
| GE85645   | TOMM40L   | 0.027   | 1.59                | NM_032174        | translocase of outer mitochondrial membrane 40 homolog-like (yeast)              |
| GE888220  | NUFIP2    | 0.043   | 1.59                | BF796642         | 82-kD FMRP Interacting Protein                                                   |
| GE789114  | C16ORF88  | 0.000   | 1.59                | F34272           | Similar to TSG118.1                                                              |
| GE753937  | SREBF2    | 0.027   | 1.59                | A1991305         | Sterol regulatory element binding transcription factor 2                         |
| GE85691   | RAVER2    | 0.012   | 1.59                | AB046799         | hypothetical protein FLJ10770                                                    |

| Column ID | Symbol        | p-value | FC(AI delet vs. NI) | Accession number | Description                                                                      |
|-----------|---------------|---------|---------------------|------------------|----------------------------------------------------------------------------------|
| GE499816  | MYL6          | 0.018   | 1.59                | NM_021019        | myosin, light polypeptide 6, alkali, smooth muscle and non-muscle                |
| GE53110   | PSMD12        | 0.025   | 1.60                | NM_002816        | proteasome (prosome, macropain) 26S subunit, non-ATPase, 12                      |
| GE53756   | HSF4          | 0.003   | 1.60                | D87673           | heat shock transcription factor 4                                                |
| GE85381   | INTS2         | 0.013   | 1.60                | NM_020748        | KIAA1287                                                                         |
| GE61469   | ZNF700        | 0.010   | 1.60                | A1924688         | Zinc finger protein 700                                                          |
| GE82431   | MARK1         | 0.004   | 1.60                | NM_018650        | MAP/microtubule affinity-regulating kinase 1                                     |
| GE62298   | GLS           | 0.008   | 1.60                | NM_014905        | glutaminase                                                                      |
| GE59173   | RAB9A         | 0.002   | 1.61                | NM_004251        | RAB9A, member RAS oncogene family                                                |
| GE82617   | ELK4          | 0.030   | 1.61                | NM_001973        | ELK4, ETS-domain protein (SRF accessory protein 1)                               |
| GE53132   | HDAC4         | 0.033   | 1.61                | NM_006037        | histone deacetylase 4                                                            |
| GE886331  | MCTS1         | 0.047   | 1.61                | AW386292         | C1GALT1-specific chaperone 1                                                     |
| GE82055   | MRPL4         | 0.045   | 1.61                | NM_015956        | mitochondrial ribosomal protein L4                                               |
| GE59856   | CSK           | 0.025   | 1.61                | NM_004383        | c-src tyrosine kinase                                                            |
| GE841830  | INMT          | 0.023   | 1.61                | NM_006774        | indolethylamine N-methyltransferase                                              |
| GE84016   | CALCOCO1      | 0.029   | 1.61                | BQ711854         | Calcium binding and coiled-coil domain 1                                         |
| GE719636  | TRIO          | 0.048   | 1.61                | BX093523         | Triple functional domain (PTPRF interacting)                                     |
| GE88656   | MSL3          | 0.045   | 1.61                | NM_006800        | male-specific lethal 3-like 1 (Drosophila)                                       |
| GE82142   | SIRT7         | 0.001   | 1.62                | NM_016538        | sirtuin (silent mating type information regulation 2 homolog) 7 (S. cerevisiae)  |
| GE769325  | UNKL          | 0.025   | 1.62                | AW382204         | Chromosome 16 open reading frame 28                                              |
| GE512985  | ARSH          | 0.035   | 1.62                | XM_293401        | synonym: sulfatase; go_function: sulfuric ester hydrolase activity [goid 0008484 |
| GE531346  | MYEF2         | 0.028   | 1.62                | A1572493         | Solute carrier family 24, member 5                                               |
| GE58352   | NDUFA5        | 0.028   | 1.62                | NM_005000        | NADH dehydrogenase (ubiquinone) 1 alpha subcomplex, 5, 13kDa                     |
| GE822595  | C19ORF44      | 0.042   | 1.62                | BE878259         | chromosome 19 open reading frame 44                                              |
| GE633042  | RPL35A        | 0.043   | 1.63                | A1306578         | Ribosomal protein L35a                                                           |
| GE59136   | CDKN2D        | 0.037   | 1.63                | NM_001800        | cyclin-dependent kinase inhibitor 2D (p19, inhibits CDK4)                        |
| GE504557  | OR3A2         | 0.021   | 1.63                | NM_002551        | olfactory receptor, family 3, subfamily A, member 2                              |
| GE79322   | GIPC1         | 0.028   | 1.63                | NM_005716        | GIPC PDZ domain containing family, member 1                                      |
| GE59801   | CKS1B         | 0.046   | 1.63                | NM_001826        | CDC28 protein kinase regulatory subunit 1B                                       |
| GE87559   | KIAA1467      | 0.023   | 1.63                | C18454           | KIAA1467 protein                                                                 |
| GE85700   | SAPS2         | 0.047   | 1.64                | N45732           | SAPS domain family, member 2                                                     |
| GE58304   | HIST1H4C      | 0.031   | 1.64                | NM_003542        | histone 1, H4c                                                                   |
| GE587455  | ZZEF1         | 0.047   | 1.64                | A1732604         | Zinc finger, ZZ-type with EF-hand domain 1                                       |
| GE488070  | C10ORF51      | 0.022   | 1.64                | AK128027         | chromosome 10 open reading frame 51                                              |
| GE59925   | PCK1          | 0.027   | 1.64                | NM_006201        | PCTAIRE protein kinase 1                                                         |
| GE86885   | RPS27L        | 0.049   | 1.64                | BC047648         | ribosomal protein S27-like                                                       |
| GE796431  | PHOX2A        | 0.047   | 1.65                | NM_005169        | paired-like (aristaless) homeobox 2a                                             |
| GE592302  | PTEN          | 0.029   | 1.65                | A1917390         | Phosphatase and tensin homolog (mutated in multiple advanced cancers 1)          |
| GE55886   | CCDC25        | 0.042   | 1.65                | NM_018246        | coiled-coil domain containing 25                                                 |
| GE57455   | GAS2L3        | 0.005   | 1.65                | NM_174942        | growth arrest-specific 2 like 3                                                  |
| GE81085   | CTNNA1        | 0.032   | 1.66                | NM_001903        | catenin (cadherin-associated protein), alpha 1, 102kDa                           |
| GE87513   | LYPLAL1       | 0.046   | 1.66                | BM714914         | Lysophospholipase-like 1                                                         |
| GE552994  | DKFZP781N1041 | 0.047   | 1.66                | AW340603         | Similar to RIKEN cDNA 6430537H07 gene                                            |
| GE733458  | CD99          | 0.014   | 1.66                | CB130113         | CD99 antigen                                                                     |
| GE687007  | B4GALNT4      | 0.039   | 1.66                | NM_178537        | beta1,4-N-acetylgalactosaminyltransferases IV                                    |
| GE56468   | KCTD9         | 0.046   | 1.67                | NM_017634        | potassium channel tetramerisation domain containing 9                            |
| GE591298  | NSMCE2        | 0.050   | 1.67                | A1082823         | Chromosome 8 open reading frame 36                                               |
| GE84139   | PFND2         | 0.042   | 1.67                | BG542161         | Prefoldin 2                                                                      |
| GE549080  | OR7D2         | 0.030   | 1.67                | AK095468         | olfactory receptor, family 7, subfamily D, member 2                              |

| Column ID | Symbol       | p-value | FC(AI delet vs. NI) | Accession number | Description                                                                      |
|-----------|--------------|---------|---------------------|------------------|----------------------------------------------------------------------------------|
| GE57033   | PNPT1        | 0.000   | 1.67                | NM_033109        | polyribonucleotide nucleotidyltransferase 1                                      |
| GE55260   | SLC19A2      | 0.024   | 1.67                | NM_006996        | solute carrier family 19 (thiamine transporter), member 2                        |
| GE775043  | C6ORF222     | 0.039   | 1.67                | BX648558         | hypothetical protein DKFZp779B1540                                               |
| GE473534  | NLN          | 0.023   | 1.68                | NM_020726        | neurolysin (metallopeptidase M3 family)                                          |
| GE815694  | HK1          | 0.038   | 1.68                | A1972312         | Hexokinase 1                                                                     |
| GE852866  | DIDO1        | 0.020   | 1.68                | BM987066         | Death inducer-obliterator 1                                                      |
| GE63277   | PCDHB9       | 0.013   | 1.68                | NM_019119        | protocadherin beta 9                                                             |
| GE843609  | FBP2         | 0.016   | 1.69                | BF514199         | Fructose-1,6-bisphosphatase 2                                                    |
| GE588065  | ITGB3BP      | 0.035   | 1.69                | BX091255         | Integrin beta 3 binding protein (beta3-endonexin)                                |
| GE83566   | KIAA1984     | 0.041   | 1.69                | BM511494         | Chromosome 9 open reading frame 86                                               |
| GE80956   | GNRH1        | 0.026   | 1.69                | NM_000825        | gonadotropin-releasing hormone 1 (luteinizing-releasing hormone)                 |
| GE506550  | GABPB2       | 0.008   | 1.69                | NM_144618        | hypothetical protein MGC29891                                                    |
| GE625819  | WWOX         | 0.038   | 1.69                | BM716547         | WW domain containing oxidoreductase                                              |
| GE54725   | ERO1L        | 0.006   | 1.70                | NM_014584        | ERO1-like ( <i>S. cerevisiae</i> )                                               |
| GE890401  | NFKBID       | 0.041   | 1.70                | NM_032721        | T-cell activation NFKB-like protein                                              |
| GE85297   | SMARCAL1     | 0.006   | 1.70                | A1797084         | SWI/SNF related, matrix associated, actin dependent regulator of chromatin, subf |
| GE88495   | GPR108       | 0.023   | 1.70                | BG987489         | G protein-coupled receptor 108                                                   |
| GE81242   | STRN         | 0.049   | 1.70                | NM_003162        | striatin, calmodulin binding protein                                             |
| GE88555   | PIK3CA       | 0.004   | 1.70                | BX341752         | Phosphoinositide-3-kinase, catalytic, alpha polypeptide                          |
| GE888638  | PMPCB        | 0.024   | 1.71                | BM722628         | Peptidase (mitochondrial processing) beta                                        |
| GE83395   | CCDC77       | 0.005   | 1.71                | NM_032358        | hypothetical protein MGC13183                                                    |
| GE867238  | ZNF600       | 0.044   | 1.71                | AA723897         | Zinc finger protein 600                                                          |
| GE662578  | RGS3         | 0.002   | 1.71                | AW151660         | regulator of G-protein signaling 3                                               |
| GE85599   | ZNF80        | 0.017   | 1.71                | X65233           | zinc finger protein 80 (pT17)                                                    |
| GE498773  | MRS2         | 0.018   | 1.71                | BQ721189         | MRS2-like, magnesium homeostasis factor ( <i>S. cerevisiae</i> )                 |
| GE55471   | RPP25        | 0.033   | 1.71                | NM_017793        | ribonuclease P 25kDa subunit                                                     |
| GE87326   | CTHRC1       | 0.038   | 1.71                | NM_138455        | collagen triple helix repeat containing 1                                        |
| GE572531  | HIST1H4D     | 0.045   | 1.71                | NM_003539        | histone 1, H4d                                                                   |
| GE81468   | TLE3         | 0.048   | 1.72                | NM_005078        | transducin-like enhancer of split 3 (E(sp1) homolog, <i>Drosophila</i> )         |
| GE62464   | USF1         | 0.013   | 1.72                | NM_007122        | upstream transcription factor 1                                                  |
| GE860286  | ARHGAP26     | 0.013   | 1.72                | BU754312         | Rho GTPase activating protein 26                                                 |
| GE756208  | NRXN1        | 0.038   | 1.72                | AA174070         | Neurexin 1                                                                       |
| GE56782   | C19ORF66     | 0.042   | 1.73                | NM_018381        | hypothetical protein FLJ11286                                                    |
| GE57352   | DNAJB1       | 0.026   | 1.73                | NM_006145        | DnaJ (Hsp40) homolog, subfamily B, member 1                                      |
| GE600869  | ITFG1        | 0.032   | 1.73                | BC015844         | T-cell immunomodulatory protein                                                  |
| GE701062  | CTNBL1       | 0.032   | 1.74                | AA693872         | Catenin, beta like 1                                                             |
| GE571843  | RHEBL1       | 0.033   | 1.74                | NM_144593        | Ras homolog enriched in brain like 1                                             |
| GE81504   | PTPN14       | 0.026   | 1.74                | CA397830         | Protein tyrosine phosphatase, non-receptor type 14                               |
| GE481202  | PRRT3        | 0.024   | 1.75                | A1807687         | proline-rich transmembrane protein 3                                             |
| GE801438  | LOC339666    | 0.009   | 1.75                | BC041349         | hypothetical protein LOC339666                                                   |
| GE86195   | THBS1        | 0.023   | 1.75                | BU959813         | Thrombospondin 1                                                                 |
| GE522927  | RP11-49G10.8 | 0.029   | 1.75                | NM_173859        | breast cancer and salivary gland expression gene                                 |
| GE86364   | SLC41A1      | 0.015   | 1.75                | NM_173854        | solute carrier family 41, member 1                                               |
| GE574644  | LYN          | 0.036   | 1.76                | BU607424         | V-yes-1 Yamaguchi sarcoma viral related oncogene homolog                         |
| GE86359   | GSTK1        | 0.039   | 1.76                | AK055103         | glutathione S-transferase kappa 1                                                |
| GE786902  | IFNGR1       | 0.042   | 1.76                | CA771718         | Interferon gamma receptor 1                                                      |
| GE56665   | UHMK1        | 0.016   | 1.76                | AA261924         | U2AF homology motif (UHM) kinase 1                                               |
| GE56161   | LOC730101    | 0.019   | 1.76                | N90633           | Hypothetical protein LOC221362                                                   |

| Column ID | Symbol         | p-value | FC(AI delet vs. NI) | Accession number | Description                                                                      |
|-----------|----------------|---------|---------------------|------------------|----------------------------------------------------------------------------------|
| GE600439  | DLEU7          | 0.026   | 1.77                | AI659523         | deleted in lymphocytic leukemia, 7                                               |
| GE518189  | SMARCA4        | 0.044   | 1.77                | BX097298         | SWI/SNF related, matrix associated, actin dependent regulator of chromatin, subf |
| GE81986   | ZZEF1          | 0.010   | 1.77                | NM_015113        | zinc finger, ZZ-type with EF-hand domain 1                                       |
| GE55266   | RPGR           | 0.029   | 1.77                | NM_000328        | retinitis pigmentosa GTPase regulator                                            |
| GE793334  | FLJ46419       | 0.047   | 1.77                | BU193672         | FLJ46419 protein                                                                 |
| GE831115  | LITAF          | 0.030   | 1.77                | AW291049         | Lipopolysaccharide-induced TNF factor                                            |
| GE622590  | POLR3H         | 0.043   | 1.78                | AA196481         | Aconitase 2, mitochondrial                                                       |
| GE53264   | NBEAL2         | 0.008   | 1.78                | BU429796         | Neurobeachin-like 2                                                              |
| GE88071   | SF4            | 0.040   | 1.78                | NM_021164        | splicing factor 4                                                                |
| GE55171   | TRPC6          | 0.031   | 1.78                | NM_004621        | transient receptor potential cation channel, subfamily C, member 6               |
| GE81563   | ZNF443         | 0.011   | 1.78                | BC032753         | zinc finger protein 443                                                          |
| GE649833  | DZIP1          | 0.038   | 1.78                | A1765929         | Claudin 10                                                                       |
| GE84637   | ATP2A3         | 0.027   | 1.79                | B1031652         | ATPase, Ca++ transporting, ubiquitous                                            |
| GE733432  | RG9MTD2        | 0.021   | 1.79                | AL564528         | RNA (guanine-9-) methyltransferase domain containing 2                           |
| GE59542   | BTN3A3         | 0.013   | 1.79                | NM_006994        | butyrophilin, subfamily 3, member A3                                             |
| GE544221  | LPCAT4         | 0.026   | 1.79                | NM_153613        | 1-acylglycerol-3-phosphate O-acyltransferase 7 (lysophosphatidic acid acyltransf |
| GE80135   | ATP6AP2        | 0.024   | 1.79                | NM_005765        | ATPase, H+ transporting, lysosomal accessory protein 2                           |
| GE81309   | SORBS2         | 0.045   | 1.79                | NM_003603        | sorbin and SH3 domain containing 2                                               |
| GE88304   | LOC375010      | 0.035   | 1.79                | U79301           | hypothetical LOC375010                                                           |
| GE676136  | NPAL2          | 0.030   | 1.79                | AA814011         | NIPA-like domain containing 2                                                    |
| GE633524  | PIK3R1         | 0.006   | 1.80                | A1379149         | Phosphoinositide-3-kinase, regulatory subunit 1 (p85 alpha)                      |
| GE583261  | SLC19A2        | 0.043   | 1.80                | AK093612         | Solute carrier family 19 (thiamine transporter), member 2                        |
| GE58207   | ENG            | 0.010   | 1.80                | NM_000118        | endoglin (Osler-Rendu-Weber syndrome 1)                                          |
| GE765853  | TRPM3          | 0.026   | 1.80                | AW022053         | Transient receptor potential cation channel, subfamily M, member 3               |
| GE905935  | MCCC2          | 0.028   | 1.80                | AF086534         | Methylcrotonoyl-Coenzyme A carboxylase 2 (beta)                                  |
| GE83128   | SPTBN4         | 0.020   | 1.80                | NM_020971        | spectrin, beta, non-erythrocytic 4                                               |
| GE785534  | NEURL          | 0.020   | 1.81                | BX335392         | neuralized homolog (Drosophila)                                                  |
| GE58184   | CD36           | 0.038   | 1.81                | NM_000072        | CD36 antigen (collagen type I receptor, thrombospondin receptor)                 |
| GE768406  | NAT5           | 0.012   | 1.81                | AA724829         | N-acetyltransferase 5 (ARD1 homolog, S. cerevisiae)                              |
| GE88813   | GLT25D1        | 0.026   | 1.81                | NM_024656        | glycosyltransferase 25 domain containing 1                                       |
| GE54543   | ESRRG          | 0.049   | 1.82                | NM_001438        | estrogen-related receptor gamma                                                  |
| GE876989  | C3ORF23        | 0.043   | 1.82                | BG493222         | Chromosome 3 open reading frame 23                                               |
| GE56689   | LOC54492       | 0.037   | 1.82                | CD677650         | Hypothetical protein DKFZP761M1511                                               |
| GE87532   | LOC653506      | 0.034   | 1.83                | AF086149         | Ubiquitin C                                                                      |
| GE56089   | CLCN7          | 0.009   | 1.83                | NM_001287        | chloride channel 7                                                               |
| GE535968  | ADAMTS6        | 0.031   | 1.83                | NM_197941        | ADAM metalloproteinase with thrombospondin type 1 motif, 6                       |
| GE484981  | UNC5CL         | 0.035   | 1.83                | NM_173561        | unc-5 homolog C (C. elegans)-like                                                |
| GE906547  | C2ORF27        | 0.013   | 1.83                | BG575991         | chromosome 2 open reading frame 27                                               |
| GE740229  | COMMMD10       | 0.039   | 1.83                | CA773690         | COMM domain containing 10                                                        |
| GE494547  | KIAA1377       | 0.034   | 1.84                | AK095004         | KIAA1377 protein                                                                 |
| GE772434  | ITGB1BP1       | 0.022   | 1.84                | BX113943         | Integrin beta 1 binding protein 1                                                |
| GE59587   | WDR68          | 0.011   | 1.84                | NM_005828        | WD repeat domain 68                                                              |
| GE547975  | RNF215         | 0.023   | 1.84                | A1494102         | KIAA1656 protein                                                                 |
| GE85868   | ATP6V0A1       | 0.015   | 1.84                | T27157           | ATPase, H+ transporting, lysosomal V0 subunit a isoform 1                        |
| GE58013   | NFIA           | 0.003   | 1.84                | NM_181504        | phosphoinositide-3-kinase, regulatory subunit 1 (p85 alpha)                      |
| GE649923  | EDAR           | 0.022   | 1.84                | A1732569         | Ectodysplasin A receptor                                                         |
| GE487405  | DKFZP686I15217 | 0.041   | 1.84                | A1190029         | Hypothetical protein DKFZp686I15217                                              |
| GE62820   | THOC4          | 0.007   | 1.85                | NM_005782        | THO complex 4                                                                    |

| Column ID | Symbol    | p-value | FC(AI delet vs. NI) | Accession number | Description                                                                      |
|-----------|-----------|---------|---------------------|------------------|----------------------------------------------------------------------------------|
| GE882682  | C9ORF117  | 0.044   | 1.85                | BF338273         | Chromosome 9 open reading frame 117                                              |
| GE61522   | BPNT1     | 0.018   | 1.85                | NM_006085        | 3'(2'), 5'-bisphosphate nucleotidase 1                                           |
| GE57935   | LSP1      | 0.017   | 1.85                | NM_002339        | lymphocyte-specific protein 1                                                    |
| GE60089   | NEB       | 0.009   | 1.85                | NM_004543        | nebulin                                                                          |
| GE733097  | FLJ39739  | 0.019   | 1.85                | AK097058         | FLJ39739 protein                                                                 |
| GE57493   | ITGAM     | 0.040   | 1.86                | NM_000632        | integrin, alpha M (complement component receptor 3, alpha; also known as CD11b ( |
| GE61055   | UAP1L1    | 0.016   | 1.86                | BM044040         | UDP-N-acetylglucosamine pyrophosphorylase 1-like 1                               |
| GE87560   | SNX18     | 0.032   | 1.86                | AA504570         | Sorting nexin associated golgi protein 1                                         |
| GE774158  | METT5D1   | 0.043   | 1.86                | AW117704         | xe34e12.x1 NCI_CGAP_Ut1 Homo sapiens cDNA clone IMAGE:2609038 3' similar to cont |
| GE83217   | ZNF93     | 0.018   | 1.86                | AK022550         | zinc finger protein 505                                                          |
| GE57664   | VLDLR     | 0.031   | 1.87                | NM_003383        | very low density lipoprotein receptor                                            |
| GE82201   | NDE1      | 0.009   | 1.87                | NM_017668        | nudE nuclear distribution gene E homolog 1 (A. nidulans)                         |
| GE61297   | APOBEC3B  | 0.019   | 1.87                | NM_004900        | apolipoprotein B mRNA editing enzyme, catalytic polypeptide-like 3B              |
| GE83885   | C21ORF29  | 0.032   | 1.87                | NM_144991        | chromosome 21 open reading frame 29                                              |
| GE85553   | SCAF1     | 0.022   | 1.87                | NM_021228        | serine arginine-rich pre-mRNA splicing factor SR-A1                              |
| GE57299   | UCK2      | 0.009   | 1.87                | NM_012474        | uridine-cytidine kinase 2                                                        |
| GE83493   | NFKBID    | 0.025   | 1.88                | NM_032721        | T-cell activation NFKB-like protein                                              |
| GE53850   | ASAP1     | 0.028   | 1.88                | BF058310         | DDEF1 intronic transcript 1                                                      |
| GE86716   | TFDP2     | 0.020   | 1.88                | BX647881         | Transcription factor Dp-2 (E2F dimerization partner 2)                           |
| GE86069   | EMB       | 0.044   | 1.88                | NM_198449        | embigin homolog (mouse)                                                          |
| GE511138  | MAGI1     | 0.040   | 1.88                | AK130632         | membrane associated guanylate kinase, WW and PDZ domain containing 1             |
| GE81669   | MMP24     | 0.015   | 1.88                | NM_006690        | matrix metalloproteinase 24 (membrane-inserted)                                  |
| GE528325  | RGS5      | 0.016   | 1.88                | AA229652         | Regulator of G-protein signalling 5                                              |
| GE86044   | SLC25A39  | 0.033   | 1.88                | BF317223         | CGI-69 protein                                                                   |
| GE81392   | DDX12     | 0.013   | 1.89                | AA385297         | DEAD/H (Asp-Glu-Ala-Asp/His) box polypeptide 12 (CHL1-like helicase homolog, S.  |
| GE514327  | PNLDC1    | 0.035   | 1.90                | NM_173516        | poly(A)-specific ribonuclease (PARN)-like domain containing 1                    |
| GE700641  | FRMD4A    | 0.028   | 1.90                | AA917972         | FERM domain containing 4A                                                        |
| GE609580  | ZNF766    | 0.034   | 1.90                | AU160820         | Hypothetical protein LOC90321                                                    |
| GE597704  | SRI       | 0.038   | 1.90                | BE551081         | Sorcin                                                                           |
| GE54481   | CROT      | 0.001   | 1.90                | NM_021151        | carnitine O-octanoyltransferase                                                  |
| GE84013   | C1ORF192  | 0.002   | 1.91                | AK023394         | Chromosome 1 open reading frame 192                                              |
| GE56486   | KIF20B    | 0.044   | 1.91                | NM_016195        | M-phase phosphoprotein 1                                                         |
| GE490200  | MRPL55    | 0.036   | 1.91                | AK094778         | mitochondrial ribosomal protein L55                                              |
| GE61543   | IARS2     | 0.014   | 1.91                | NM_018060        | isoleucine-tRNA synthetase 2, mitochondrial                                      |
| GE649929  | MED24     | 0.041   | 1.91                | AW516080         | Thyroid hormone receptor associated protein 4                                    |
| GE87171   | UNC13D    | 0.024   | 1.91                | T83023           | Unc-13 homolog D (C. elegans)                                                    |
| GE81642   | SPAG5     | 0.013   | 1.91                | NM_006461        | sperm associated antigen 5                                                       |
| GE54699   | CHRD      | 0.032   | 1.91                | NM_003741        | chordin                                                                          |
| GE494016  | LOC389043 | 0.005   | 1.91                | AK125982         | Hypothetical gene supported by AK125982; BC042817                                |
| GE54944   | IER5      | 0.029   | 1.92                | NM_016545        | immediate early response 5                                                       |
| GE481095  | C18ORF24  | 0.004   | 1.92                | NM_145060        | chromosome 18 open reading frame 24                                              |
| GE848907  | UBE2E2    | 0.025   | 1.92                | BQ002494         | Ubiquitin-conjugating enzyme E2E 2 (UBC4/5 homolog, yeast)                       |
| GE709150  | PRPF18    | 0.031   | 1.92                | BM788348         | PRP18 pre-mRNA processing factor 18 homolog (yeast)                              |
| GE88341   | PFKFB2    | 0.006   | 1.92                | AB044805         | 6-phosphofructo-2-kinase/fructose-2,6-biphosphatase 2                            |
| GE53021   | SOCS1     | 0.027   | 1.92                | NM_003745        | suppressor of cytokine signaling 1                                               |
| GE55660   | LOC286272 | 0.013   | 1.92                | AK000939         | hypothetical protein LOC286272                                                   |
| GE833861  | STK38L    | 0.034   | 1.93                | AW444572         | Serine/threonine kinase 38 like                                                  |
| GE512449  | FAF1      | 0.036   | 1.93                | AV655330         | Fas (TNFRSF6) associated factor 1                                                |

| Column ID | Symbol    | p-value | FC(AI delet vs. NI) | Accession number | Description                                                                      |
|-----------|-----------|---------|---------------------|------------------|----------------------------------------------------------------------------------|
| GE59309   | BRCA1     | 0.049   | 1.93                | NM_007296        | breast cancer 1, early onset                                                     |
| GE81666   | CCL27     | 0.008   | 1.93                | NM_006664        | chemokine (C-C motif) ligand 27                                                  |
| GE763425  | TBC1D16   | 0.023   | 1.93                | AU253627         | AU253627 human unfavorable neuroblastoma cDNA Homo sapiens cDNA clone Nbla10286  |
| GE710170  | LOC728606 | 0.031   | 1.93                | AK056805         | CDNA FLJ32243 fis, clone PROST1000039                                            |
| GE83188   | C14ORF93  | 0.016   | 1.93                | BC045740         | Chromosome 14 open reading frame 93                                              |
| GE81716   | BTN3A1    | 0.013   | 1.94                | NM_007048        | butyrophilin, subfamily 3, member A1                                             |
| GE506792  | ME3       | 0.046   | 1.94                | AW015176         | malic enzyme 3, NADP(+)-dependent, mitochondrial                                 |
| GE85128   | HIBCH     | 0.043   | 1.94                | AW104464         | 3-hydroxyisobutyryl-Coenzyme A hydrolase                                         |
| GE59892   | FBN1      | 0.027   | 1.94                | NM_000138        | fibrillin 1 (Marfan syndrome)                                                    |
| GE657015  | CDH11     | 0.029   | 1.95                | AI291310         | Cadherin 11, type 2, OB-cadherin (osteoblast)                                    |
| GE500145  | LOC152586 | 0.046   | 1.95                | BQ428631         | Similar to RIKEN cDNA 4933434I20                                                 |
| GE715872  | RERE      | 0.045   | 1.95                | AW235269         | arginine-glutamic acid dipeptide (RE) repeats                                    |
| GE81991   | RCOR1     | 0.034   | 1.95                | NM_015156        | REST corepressor 1                                                               |
| GE81688   | SPINK5    | 0.001   | 1.96                | NM_006846        | serine peptidase inhibitor, Kazal type 5                                         |
| GE517478  | DOCK2     | 0.041   | 1.96                | NM_004946        | dedicator of cytokinesis 2                                                       |
| GE58734   | DTL       | 0.046   | 1.96                | NM_016448        | denticleless homolog (Drosophila)                                                |
| GE87462   | SMARCD2   | 0.001   | 1.96                | NM_003077        | SWI/SNF related, matrix associated, actin dependent regulator of chromatin, subf |
| GE55640   | C19ORF60  | 0.042   | 1.96                | NM_017967        | hypothetical protein FLJ20850                                                    |
| GE60197   | RAD54L    | 0.011   | 1.97                | NM_003579        | RAD54-like (S. cerevisiae)                                                       |
| GE865501  | DNAH10    | 0.048   | 1.97                | BU741872         | Dynein, axonemal, heavy polypeptide 10                                           |
| GE782884  | STXBP6    | 0.043   | 1.97                | AI669586         | Syntaxin binding protein 6 (amisyn)                                              |
| GE62068   | KLHL12    | 0.004   | 1.97                | NM_021633        | kelch-like 12 (Drosophila)                                                       |
| GE84183   | FLJ14186  | 0.037   | 1.97                | AF086554         | Hypothetical gene supported by AK024248; AL137733                                |
| GE87732   | GDPD3     | 0.049   | 1.98                | NM_024307        | glycerophosphodiester phosphodiesterase domain containing 3                      |
| GE671817  | ZDHHC1    | 0.028   | 1.98                | C14858           | C14858 Clontech human aorta polyA+ mRNA (#6572) Homo sapiens cDNA clone 093E04 3 |
| GE84903   | OCIAD1    | 0.010   | 1.98                | BU854406         | OCIA domain containing 1                                                         |
| GE56586   | INTS7     | 0.031   | 1.99                | AA418221         | Chromosome 1 open reading frame 73                                               |
| GE84734   | UBE3A     | 0.042   | 1.99                | BU659774         | Small nuclear ribonucleoprotein polypeptide N                                    |
| GE729467  | STK32B    | 0.044   | 2.00                | BE503322         | Serine/threonine kinase 32B                                                      |
| GE819111  | TUBE1     | 0.000   | 2.00                | AK126191         | Tubulin, epsilon 1                                                               |
| GE863397  | SLFN5     | 0.031   | 2.00                | N43973           | schlafen family member 5                                                         |
| GE82388   | ASAP1     | 0.028   | 2.01                | BF094007         | DDEF1 intronic transcript 1                                                      |
| GE619667  | SHH       | 0.015   | 2.01                | NM_000193        | sonic hedgehog homolog (Drosophila)                                              |
| GE62917   | FCGR3A    | 0.028   | 2.01                | NM_000569        | Fc fragment of IgG, low affinity IIIa, receptor (CD16a)                          |
| GE596018  | NR3C1     | 0.019   | 2.01                | R62551           | Nuclear receptor subfamily 3, group C, member 1 (glucocorticoid receptor)        |
| GE59644   | TGFB1     | 0.019   | 2.02                | NM_000660        | transforming growth factor, beta 1 (Camurati-Engelmann disease)                  |
| GE56305   | CASP4     | 0.041   | 2.02                | W39601           | Caspase 4, apoptosis-related cysteine peptidase                                  |
| GE53331   | UPB1      | 0.028   | 2.02                | NM_016327        | ureidopropionase, beta                                                           |
| GE894671  | ZNF321    | 0.006   | 2.02                | BQ007859         | Transcribed locus, weakly similar to XP_517655.1 PREDICTED: similar to KIAA0825  |
| GE88297   | TMEM81    | 0.005   | 2.02                | AY359081         | similar to RIKEN cDNA 4930429O20                                                 |
| GE55217   | SLC25A10  | 0.014   | 2.02                | NM_012140        | solute carrier family 25 (mitochondrial carrier; dicarboxylate transporter), mem |
| GE87212   | GTDC1     | 0.012   | 2.03                | NM_024659        | glycosyltransferase-like domain containing 1                                     |
| GE60547   | BTN3A2    | 0.004   | 2.03                | AA310176         | Butyrophilin, subfamily 3, member A2                                             |
| GE62210   | B3GNT5    | 0.025   | 2.03                | NM_032047        | UDP-GlcNAc:betaGal beta-1,3-N-acetylglucosaminyltransferase 5                    |
| GE56253   | EMILIN1   | 0.009   | 2.04                | NM_007046        | elastin microfibril interfacier 1                                                |
| GE57441   | FSTL1     | 0.007   | 2.04                | NM_007085        | folliculin-like 1                                                                |
| GE58045   | DRD5      | 0.014   | 2.05                | NM_000798        | dopamine receptor D5                                                             |
| GE483991  | WIPI1     | 0.016   | 2.05                | BM664718         | WD repeat domain, phosphoinositide interacting 1                                 |



| Column ID | Symbol    | p-value | FC(AI delet vs. NI) | Accession number | Description                                                 |
|-----------|-----------|---------|---------------------|------------------|-------------------------------------------------------------|
| GE56177   | TTC22     | 0.020   | 2.05                | BM919426         | Tetratricopeptide repeat domain 22                          |
| GE888171  | MXD3      | 0.034   | 2.05                | BQ053282         | MAX dimerization protein 3                                  |
| GE81249   | TFRC      | 0.039   | 2.06                | NM_003234        | transferrin receptor (p90, CD71)                            |
| GE712156  | LPCAT4    | 0.026   | 2.06                | A1679759         | lysophosphatidylcholine acyltransferase 4                   |
| GE663037  | LOC728531 | 0.018   | 2.07                | A1561175         | hypothetical LOC728531                                      |
| GE83345   | ANKRD20A1 | 0.027   | 2.07                | AL136793         | ankyrin repeat domain 20 family, member A1                  |
| GE61778   | GLT8D2    | 0.041   | 2.07                | NM_031302        | glycosyltransferase 8 domain containing 2                   |
| GE55804   | GNL3L     | 0.032   | 2.08                | NM_019067        | guanine nucleotide binding protein-like 3 (nucleolar)-like  |
| GE59426   | RAPGEF4   | 0.038   | 2.08                | NM_007023        | Rap guanine nucleotide exchange factor (GEF) 4              |
| GE87753   | REEP4     | 0.003   | 2.09                | NM_025232        | chromosome 8 open reading frame 20                          |
| GE59715   | IRF1      | 0.003   | 2.09                | NM_002198        | interferon regulatory factor 1                              |
| GE80003   | GNA13     | 0.021   | 2.09                | NM_006572        | guanine nucleotide binding protein (G protein), alpha 13    |
| GE79364   | B2M       | 0.001   | 2.10                | NM_004048        | beta-2-microglobulin                                        |
| GE694755  | CD1C      | 0.037   | 2.10                | AW024273         | Transcribed locus                                           |
| GE63154   | MAP3K11   | 0.007   | 2.11                | A1738536         | Mitogen-activated protein kinase kinase kinase 11           |
| GE55120   | TCF19     | 0.035   | 2.11                | A1989809         | POU domain, class 5, transcription factor 1                 |
| GE56789   | ECT2      | 0.015   | 2.11                | NM_018098        | epithelial cell transforming sequence 2 oncogene            |
| GE834142  | LOC284890 | 0.044   | 2.11                | AW291007         | Similar to RIKEN cDNA 4930583C14                            |
| GE54147   | NDC80     | 0.039   | 2.11                | NM_006101        | kinetochore associated 2                                    |
| GE820751  | PPM1H     | 0.001   | 2.11                | BM721901         | Protein phosphatase 1H (PP2C domain containing)             |
| GE470813  | SCHIP1    | 0.017   | 2.11                | BF111903         | Schwannomin interacting protein 1                           |
| GE82569   | PCDHB16   | 0.013   | 2.12                | NM_020957        | protocadherin beta 16                                       |
| GE481319  | ZNF57     | 0.019   | 2.12                | NM_173480        | hypothetical protein LOC126295                              |
| GE53936   | ARRDC3    | 0.028   | 2.12                | NM_020801        | arrestin domain containing 3                                |
| GE572630  | FLJ20464  | 0.005   | 2.13                | NM_017834        | hypothetical protein FLJ20464                               |
| GE53242   | CCL26     | 0.035   | 2.13                | NM_006072        | chemokine (C-C motif) ligand 26                             |
| GE59795   | TYK2      | 0.034   | 2.13                | NM_003331        | tyrosine kinase 2                                           |
| GE54230   | RGS12     | 0.023   | 2.14                | NM_002926        | regulator of G-protein signalling 12                        |
| GE608195  | EXPH5     | 0.008   | 2.14                | AK000786         | Exophilin 5                                                 |
| GE57498   | TOP2A     | 0.003   | 2.14                | NM_001067        | topoisomerase (DNA) II alpha 170kDa                         |
| GE85962   | PIK3R1    | 0.014   | 2.14                | NM_181504        | phosphoinositide-3-kinase, regulatory subunit 1 (p85 alpha) |
| GE474661  | FLJ90723  | 0.046   | 2.14                | BC046188         | Homo sapiens, clone IMAGE:5092955                           |
| GE736690  | CDCA2     | 0.003   | 2.14                | AA278504         | Cell division cycle associated 2                            |
| GE62259   | MICB      | 0.002   | 2.15                | NM_005931        | MHC class I polypeptide-related sequence B                  |
| GE781278  | TRIM37    | 0.041   | 2.15                | AA460710         | Tripartite motif-containing 37                              |
| GE808724  | C21ORF90  | 0.039   | 2.16                | BE549688         | Chromosome 21 open reading frame 90                         |
| GE57024   | SH3RF1    | 0.041   | 2.16                | NM_020870        | SH3 multiple domains 2                                      |
| GE60098   | RBBP5     | 0.008   | 2.16                | NM_005057        | retinoblastoma binding protein 5                            |
| GE52951   | BCL6B     | 0.042   | 2.17                | NM_181844        | B-cell CLL/lymphoma 6, member B (zinc finger protein)       |
| GE554574  | LOC149643 | 0.005   | 2.17                | BM559359         | Hypothetical LOC149643                                      |
| GE59759   | CCNA2     | 0.010   | 2.17                | CF139543         | Cyclin A2                                                   |
| GE83306   | MND1      | 0.034   | 2.18                | NM_032117        | GAJ protein                                                 |
| GE617543  | UCK2      | 0.009   | 2.19                | BP431917         | LOC440701                                                   |
| GE81622   | IFI30     | 0.005   | 2.19                | NM_006332        | interferon, gamma-inducible protein 30                      |
| GE79012   | ESPL1     | 0.020   | 2.19                | NM_012291        | extra spindle poles like 1 (S. cerevisiae)                  |
| GE80790   | C22ORF25  | 0.011   | 2.20                | BE708875         | Non-metastatic cells 2, protein (NM23B) expressed in        |
| GE56483   | ULK3      | 0.027   | 2.20                | NM_015518        | unc-51-like kinase 3 (C. elegans)                           |
| GE63200   | DNPEP     | 0.016   | 2.20                | BE671707         | Aspartyl aminopeptidase                                     |

| Column ID | Symbol       | p-value | FC(AI delet vs. NI) | Accession number | Description                                                                      |
|-----------|--------------|---------|---------------------|------------------|----------------------------------------------------------------------------------|
| GE59170   | BMP4         | 0.023   | 2.21                | NM_001202        | bone morphogenetic protein 4                                                     |
| GE478996  | CDCA5        | 0.019   | 2.21                | NM_080668        | cell division cycle associated 5                                                 |
| GE590054  | E2F5         | 0.011   | 2.21                | AI277955         | qm51c01.x1 Soares_placenta_8to9weeks_2NbHP8to9W Homo sapiens cDNA clone IMAGE:18 |
| GE57617   | ENPEP        | 0.027   | 2.21                | NM_001977        | glutamyl aminopeptidase (aminopeptidase A)                                       |
| GE88347   | KLHL29       | 0.037   | 2.22                | AL589210         | Kelch repeat and BTB (POZ) domain containing 9                                   |
| GE55780   | CEP55        | 0.005   | 2.22                | NM_018131        | centrosomal protein 55kDa                                                        |
| GE709079  | LSR          | 0.034   | 2.22                | AA527172         | Lipolysis stimulated lipoprotein receptor                                        |
| GE83335   | NLRC5        | 0.045   | 2.24                | BF365509         | Nucleotide-binding oligomerization domains 27                                    |
| GE906759  | LOC100129837 | 0.045   | 2.24                | AK092197         | similar to ZNF124 protein                                                        |
| GE57140   | ADAM8        | 0.012   | 2.24                | NM_001109        | ADAM metallopeptidase domain 8                                                   |
| GE711932  | ITGAV        | 0.046   | 2.24                | AA558704         | Integrin, alpha V (vitronectin receptor, alpha polypeptide, antigen CD51)        |
| GE61581   | GLIPR1       | 0.012   | 2.24                | BU675991         | GLI pathogenesis-related 1 (glioma)                                              |
| GE858059  | CHSY3        | 0.022   | 2.25                | BQ182928         | Chondroitin sulfate synthase 3                                                   |
| GE79181   | TAP1         | 0.004   | 2.25                | NM_000593        | transporter 1, ATP-binding cassette, sub-family B (MDR/TAP)                      |
| GE80599   | KCNC2        | 0.029   | 2.26                | NM_139136        | potassium voltage-gated channel, Shaw-related subfamily, member 2                |
| GE785548  | PLXNC1       | 0.006   | 2.27                | AI290473         | Plexin C1                                                                        |
| GE657869  | FBXO43       | 0.012   | 2.27                | AA740602         | F-box protein 43                                                                 |
| GE623989  | SLC25A28     | 0.006   | 2.28                | AK094405         | Solute carrier family 25, member 28                                              |
| GE79766   | NXT2         | 0.015   | 2.28                | NM_018698        | nuclear transport factor 2-like export factor 2                                  |
| GE81042   | CYR61        | 0.023   | 2.28                | NM_001554        | cysteine-rich, angiogenic inducer, 61                                            |
| GE55180   | RP2          | 0.000   | 2.29                | NM_006915        | retinitis pigmentosa 2 (X-linked recessive)                                      |
| GE588846  | LOC148203    | 0.017   | 2.29                | AW303287         | Hypothetical protein LOC148203                                                   |
| GE54510   | 3-Mar        | 0.019   | 2.29                | NM_178450        | membrane-associated ring finger (C3HC4) 3                                        |
| GE83121   | ZNF430       | 0.000   | 2.30                | NM_025189        | zinc finger protein 430                                                          |
| GE57827   | PROS1        | 0.050   | 2.30                | NM_000313        | protein S (alpha)                                                                |
| GE54586   | SMTN         | 0.029   | 2.30                | NM_006932        | smoothelin                                                                       |
| GE79183   | IGF2         | 0.039   | 2.31                | NM_000612        | insulin-like growth factor 2 (somatomedin A)                                     |
| GE81571   | TRAIP        | 0.005   | 2.31                | NM_005879        | TRAF interacting protein                                                         |
| GE81088   | CFD          | 0.031   | 2.32                | NM_001928        | D component of complement (adipsin)                                              |
| GE632956  | DAZAP1       | 0.006   | 2.32                | AI023688         | DAZ associated protein 1                                                         |
| GE80147   | GULP1        | 0.016   | 2.33                | NM_016315        | GULP, engulfment adaptor PTB domain containing 1                                 |
| GE53603   | KIAA0922     | 0.035   | 2.34                | NM_015196        | KIAA0922 protein                                                                 |
| GE905456  | KLHL18       | 0.022   | 2.34                | NM_025010        | kelch-like 18 (Drosophila)                                                       |
| GE57194   | E2F3         | 0.032   | 2.35                | NM_001949        | E2F transcription factor 3                                                       |
| GE80356   | FLJ25006     | 0.035   | 2.35                | NM_144610        | hypothetical protein FLJ25006                                                    |
| GE62031   | TINAGL1      | 0.033   | 2.37                | NM_022164        | tubulointerstitial nephritis antigen-like 1                                      |
| GE57064   | DLGAP5       | 0.001   | 2.37                | NM_014750        | discs, large homolog 7 (Drosophila)                                              |
| GE890536  | DNM3         | 0.036   | 2.37                | AK021543         | Dynamin 3                                                                        |
| GE840013  | GABRB2       | 0.028   | 2.37                | BX118696         | Gamma-aminobutyric acid (GABA) A receptor, beta 2                                |
| GE59843   | CD46         | 0.040   | 2.37                | NM_153826        | membrane cofactor protein (CD46, trophoblast-lymphocyte cross-reactive antigen)  |
| GE521024  | LOC344595    | 0.016   | 2.38                | BC045680         | Hypothetical LOC344595                                                           |
| GE57004   | PRSS23       | 0.001   | 2.38                | NM_007173        | protease, serine, 23                                                             |
| GE87123   | RPS6KL1      | 0.040   | 2.38                | AL390152         | ribosomal protein S6 kinase-like 1                                               |
| GE79130   | APOD         | 0.003   | 2.38                | NM_001647        | apolipoprotein D                                                                 |
| GE677575  | ARID1B       | 0.014   | 2.39                | BE502024         | AT rich interactive domain 1B (SWI1-like)                                        |
| GE53017   | TRAF5        | 0.025   | 2.40                | NM_004619        | TNF receptor-associated factor 5                                                 |
| GE836003  | LOC100134716 | 0.032   | 2.40                | AK125429         | CDNA FLJ43440 fis, clone OCBBF2030517                                            |
| GE59197   | CHRNB4       | 0.013   | 2.40                | NM_000750        | cholinergic receptor, nicotinic, beta polypeptide 4                              |

| Column ID | Symbol       | p-value | FC(AI delet vs. NI) | Accession number | Description                                                                            |
|-----------|--------------|---------|---------------------|------------------|----------------------------------------------------------------------------------------|
| GE59949   | PELO         | 0.019   | 2.41                | BG182768         | Pelota homolog (Drosophila)                                                            |
| GE53894   | KIAA1303     | 0.043   | 2.42                | NM_020761        | raptor                                                                                 |
| GE80759   | KRTAP4-12    | 0.009   | 2.42                | NM_031854        | keratin associated protein 4-12                                                        |
| GE62465   | KIF11        | 0.006   | 2.42                | NM_004523        | kinesin family member 11                                                               |
| GE81715   | BTN3A2       | 0.042   | 2.42                | NM_007047        | butyrophilin, subfamily 3, member A2                                                   |
| GE84296   | RAB40B       | 0.034   | 2.42                | BM928140         | RAB40B, member RAS oncogene family                                                     |
| GE82943   | FAM124B      | 0.031   | 2.43                | NM_024785        | hypothetical protein FLJ22746                                                          |
| GE523639  | UNC84A       | 0.014   | 2.44                | BM677609         | Unc-84 homolog A (C. elegans)                                                          |
| GE645838  | ALOX12       | 0.030   | 2.45                | AK074580         | CDNA FLJ90099 fis, clone HEMBA1006016                                                  |
| GE56084   | NXT2         | 0.022   | 2.45                | NM_018698        | nuclear transport factor 2-like export factor 2                                        |
| GE62878   | KCNE3        | 0.047   | 2.46                | CB267074         | Potassium voltage-gated channel, Isk-related family, member 3                          |
| GE490488  | AMBRA1       | 0.031   | 2.47                | BF086681         | Hypothetical protein FLJ20294                                                          |
| GE60045   | CTGF         | 0.040   | 2.48                | NM_001901        | connective tissue growth factor                                                        |
| GE87023   | FAM43A       | 0.029   | 2.49                | NM_153690        | family with sequence similarity 43, member A                                           |
| GE62318   | IGSF8        | 0.035   | 2.49                | NM_052868        | immunoglobulin superfamily, member 8                                                   |
| GE626484  | MIPOL1       | 0.048   | 2.49                | BC031615         | Mirror-image polydactyly 1                                                             |
| GE85319   | C21ORF63     | 0.029   | 2.49                | BM997748         | Hypothetical protein LOC442092                                                         |
| GE57534   | NPY          | 0.012   | 2.51                | NM_000905        | neuropeptide Y                                                                         |
| GE81174   | PLAGL1       | 0.038   | 2.51                | NM_002656        | pleiomorphic adenoma gene-like 1                                                       |
| GE85066   | SLC12A4      | 0.043   | 2.51                | BG977660         | Solute carrier family 12 (potassium/chloride transporters), member 4                   |
| GE80964   | MGP          | 0.023   | 2.52                | NM_000900        | matrix Gla protein                                                                     |
| GE62838   | BTN2A2       | 0.022   | 2.52                | NM_006995        | butyrophilin, subfamily 2, member A2                                                   |
| GE479853  | ABCA12       | 0.018   | 2.53                | NM_015657        | ATP-binding cassette, sub-family A (ABC1), member 12                                   |
| GE57345   | FCGBP        | 0.028   | 2.53                | NM_003890        | Fc fragment of IgG binding protein                                                     |
| GE746940  | INHBA        | 0.047   | 2.54                | CB140207         | Inhibin, beta A (activin A, activin AB alpha polypeptide)                              |
| GE53669   | TPX2         | 0.003   | 2.55                | NM_012112        | TPX2, microtubule-associated, homolog (Xenopus laevis)                                 |
| GE60482   | VLDLR        | 0.001   | 2.56                | NM_003383        | very low density lipoprotein receptor                                                  |
| GE80300   | RACGAP1      | 0.001   | 2.56                | NM_013277        | Rac GTPase activating protein 1                                                        |
| GE80529   | PLAUR        | 0.041   | 2.58                | NM_002659        | plasminogen activator, urokinase receptor                                              |
| GE523275  | LOC100127996 | 0.034   | 2.59                | BX097452         | Transcribed locus                                                                      |
| GE561268  | FOXD4L3      | 0.002   | 2.59                | NM_199135        | FOXD4-like 2                                                                           |
| GE799300  | SSH2         | 0.048   | 2.60                | NM_033389        | slingshot homolog 2 (Drosophila)                                                       |
| GE867785  | LOC400027    | 0.009   | 2.60                | BQ027566         | hypothetical gene supported by BC047417                                                |
| GE57137   | KIF14        | 0.044   | 2.60                | NM_014875        | kinesin family member 14                                                               |
| GE87422   | APLN         | 0.045   | 2.60                | BX118770         | Apelin, AGTRL1 ligand                                                                  |
| GE82666   | CENPK        | 0.007   | 2.62                | NM_022145        | leucine zipper protein FKSG14                                                          |
| GE58077   | SPR          | 0.010   | 2.63                | NM_003124        | sepiapterin reductase (7,8-dihydrobiopterin:NADP+ oxidoreductase)                      |
| GE53690   | DBF4         | 0.001   | 2.63                | NM_006716        | DBF4 homolog (S. cerevisiae)                                                           |
| GE60459   | KIAA0040     | 0.034   | 2.64                | NM_014656        | KIAA0040                                                                               |
| GE469698  | C5ORF13      | 0.039   | 2.64                | R42039           | chromosome 5 open reading frame 13                                                     |
| GE792732  | GGT1         | 0.046   | 2.64                | M24903           | gamma-glutamyltransferase 1                                                            |
| GE624182  | KIF18B       | 0.014   | 2.64                | BM999069         | Hypothetical protein LOC146909                                                         |
| GE61110   | IL32         | 0.037   | 2.65                | NM_004221        | interleukin 32                                                                         |
| GE79835   | MMP2         | 0.030   | 2.65                | NM_004530        | matrix metalloproteinase 2 (gelatinase A, 72kDa gelatinase, 72kDa type IV collagenase) |
| GE767989  | TIFA         | 0.001   | 2.66                | NM_052864        | TRAF-interacting protein with a forkhead-associated domain                             |
| GE82247   | C12ORF48     | 0.005   | 2.67                | NM_017915        | hypothetical protein FLJ20641                                                          |
| GE846640  | LOC375010    | 0.032   | 2.67                | BQ574149         | hypothetical LOC375010                                                                 |
| GE734721  | TSPAN18      | 0.005   | 2.69                | BC033368         | tetraspanin 18                                                                         |

| Column ID | Symbol    | p-value | FC(AI delet vs. NI) | Accession number | Description                                                                       |
|-----------|-----------|---------|---------------------|------------------|-----------------------------------------------------------------------------------|
| GE59688   | ITIH2     | 0.023   | 2.70                | NM_002216        | inter-alpha (globulin) inhibitor H2                                               |
| GE53544   | LMO7      | 0.008   | 2.71                | NM_005358        | LIM domain 7                                                                      |
| GE56382   | COL6A2    | 0.009   | 2.71                | NM_001849        | collagen, type VI, alpha 2                                                        |
| GE516913  | ERVWE1    | 0.020   | 2.72                | NM_014590        | endogenous retroviral family W, env(C7), member 1 (syncytin)                      |
| GE79827   | OLFML2B   | 0.021   | 2.74                | N25353           | Olfactomedin-like 2B                                                              |
| GE59302   | KIF2C     | 0.003   | 2.76                | NM_006845        | kinesin family member 2C                                                          |
| GE79587   | COL4A1    | 0.014   | 2.76                | NM_001845        | collagen, type IV, alpha 1                                                        |
| GE79508   | ENPEP     | 0.005   | 2.77                | NM_001977        | glutamyl aminopeptidase (aminopeptidase A)                                        |
| GE79889   | MXD3      | 0.047   | 2.77                | NM_031300        | MAX dimerization protein 3                                                        |
| GE532754  | CCDC70    | 0.034   | 2.78                | NM_031290        | hypothetical protein DKFZp434K1172                                                |
| GE534426  | FN1       | 0.041   | 2.78                | NM_002026        | fibronectin 1                                                                     |
| GE61391   | SNAI2     | 0.011   | 2.79                | NM_003068        | snail homolog 2 (Drosophila)                                                      |
| GE62647   | ARHGAP26  | 0.027   | 2.80                | NM_015071        | Rho GTPase activating protein 26                                                  |
| GE62200   | DNMT3A    | 0.002   | 2.81                | NM_022552        | DNA (cytosine-5-)-methyltransferase 3 alpha                                       |
| GE55801   | ASF1B     | 0.000   | 2.81                | NM_018154        | ASF1 anti-silencing function 1 homolog B (S. cerevisiae)                          |
| GE59802   | CKS2      | 0.010   | 2.82                | NM_001827        | CDC28 protein kinase regulatory subunit 2                                         |
| GE61971   | COL6A1    | 0.040   | 2.84                | BE062797         | Collagen, type VI, alpha 1                                                        |
| GE59115   | TNFSF10   | 0.025   | 2.86                | NM_003810        | tumor necrosis factor (ligand) superfamily, member 10                             |
| GE57538   | TK1       | 0.022   | 2.87                | NM_003258        | thymidine kinase 1, soluble                                                       |
| GE79600   | NOG       | 0.014   | 2.90                | NM_005450        | noggin                                                                            |
| GE61151   | FAP       | 0.037   | 2.90                | BG208151         | Fibroblast activation protein, alpha                                              |
| GE682522  | RYR2      | 0.029   | 2.92                | A1474085         | Ryanodine receptor 2 (cardiac)                                                    |
| GE59846   | RRM2      | 0.009   | 2.94                | NM_001034        | ribonucleotide reductase M2 polypeptide                                           |
| GE57381   | PXDN      | 0.008   | 2.95                | AA179761         | Peroxidasin homolog (Drosophila)                                                  |
| GE635247  | LIFR      | 0.046   | 2.96                | BE466688         | Leukemia inhibitory factor receptor                                               |
| GE79044   | IL6R      | 0.034   | 2.96                | NM_000565        | interleukin 6 receptor                                                            |
| GE541396  | C5ORF47   | 0.049   | 2.97                | BX116313         | Hypothetical protein LOC133491                                                    |
| GE836403  | PSMA1     | 0.042   | 2.98                | BF508466         | Proteasome (prosome, macropain) subunit, alpha type, 1                            |
| GE56120   | SERTAD4   | 0.007   | 2.98                | N40495           | SERTA domain containing 4                                                         |
| GE63002   | CDC2      | 0.001   | 2.98                | NM_001786        | cell division cycle 2, G1 to S and G2 to M                                        |
| GE53197   | SRGAP2    | 0.016   | 2.98                | B1497146         | SLIT-ROBO Rho GTPase activating protein 2                                         |
| GE85420   | CASC5     | 0.001   | 3.04                | AA662240         | Cancer susceptibility candidate 5                                                 |
| GE53732   | SULF1     | 0.020   | 3.06                | NM_015170        | sulfatase 1                                                                       |
| GE80890   | COL5A1    | 0.017   | 3.06                | NM_000093        | collagen, type V, alpha 1                                                         |
| GE735552  | UBE3A     | 0.022   | 3.07                | AW057554         | Ubiquitin protein ligase E3A (human papilloma virus E6-associated protein, Angel) |
| GE88232   | HTR5B     | 0.000   | 3.08                | BX113754         | 5-hydroxytryptamine (serotonin) receptor 5B                                       |
| GE57886   | CCNB1     | 0.016   | 3.09                | NM_031966        | cyclin B1                                                                         |
| GE81247   | TEC       | 0.004   | 3.12                | NM_003215        | tec protein tyrosine kinase                                                       |
| GE86945   | ELOVL7    | 0.030   | 3.12                | AL137506         | ELOVL family member 7, elongation of long chain fatty acids (yeast)               |
| GE814771  | IFT88     | 0.047   | 3.13                | AF088052         | Intraflagellar transport 88 homolog (Chlamydomonas)                               |
| GE58318   | PRC1      | 0.003   | 3.14                | NM_003981        | protein regulator of cytokinesis 1                                                |
| GE57082   | KIAA0101  | 0.005   | 3.14                | NM_014736        | KIAA0101                                                                          |
| GE56866   | HJURP     | 0.008   | 3.15                | NM_018410        | hypothetical protein DKFZp762E1312                                                |
| GE57486   | INHBA     | 0.023   | 3.15                | NM_002192        | inhibin, beta A (activin A, activin AB alpha polypeptide)                         |
| GE538804  | TXK       | 0.014   | 3.16                | AA747923         | TXK tyrosine kinase                                                               |
| GE741471  | LOC147343 | 0.000   | 3.16                | BF343036         | Hypothetical protein LOC147343                                                    |
| GE609106  | NRXN1     | 0.008   | 3.18                | B1494455         | Neurexin 1                                                                        |
| GE52999   | LRRRC8C   | 0.034   | 3.18                | BE222289         | Leucine rich repeat containing 8 family, member C                                 |

| Column ID | Symbol    | p-value | FC(AI delet vs. NI) | Accession number | Description                                                                      |
|-----------|-----------|---------|---------------------|------------------|----------------------------------------------------------------------------------|
| GE476053  | LOC340508 | 0.013   | 3.18                | BC043374         | hypothetical protein LOC340508                                                   |
| GE83237   | NUF2      | 0.038   | 3.19                | NM_031423        | cell division cycle associated 1                                                 |
| GE61338   | TAGLN     | 0.004   | 3.19                | H26843           | transgelin                                                                       |
| GE621318  | SMARCA4   | 0.012   | 3.22                | BF750200         | SWI/SNF related, matrix associated, actin dependent regulator of chromatin, subf |
| GE59766   | COL6A3    | 0.002   | 3.25                | NM_004369        | collagen, type VI, alpha 3                                                       |
| GE62111   | BCO2      | 0.046   | 3.26                | NM_031938        | beta-carotene dioxygenase 2                                                      |
| GE61153   | LDLR      | 0.017   | 3.26                | NM_000527        | low density lipoprotein receptor (familial hypercholesterolemia)                 |
| GE60354   | CENPE     | 0.000   | 3.31                | NM_001813        | centromere protein E, 312kDa                                                     |
| GE59373   | ZMYND10   | 0.023   | 3.33                | NM_015896        | zinc finger, MYND-type containing 10                                             |
| GE62933   | RHOBTB3   | 0.005   | 3.36                | NM_014899        | Rho-related BTB domain containing 3                                              |
| GE81805   | HMMR      | 0.022   | 3.40                | NM_012484        | hyaluronan-mediated motility receptor (RHAMM)                                    |
| GE78964   | CCNB2     | 0.021   | 3.43                | NM_004701        | cyclin B2                                                                        |
| GE58267   | CENPA     | 0.001   | 3.45                | NM_001809        | centromere protein A, 17kDa                                                      |
| GE56450   | MCF2      | 0.002   | 3.45                | NM_005369        | MCF.2 cell line derived transforming sequence                                    |
| GE57938   | CDC25C    | 0.039   | 3.51                | NM_001790        | cell division cycle 25C                                                          |
| GE62415   | P2RY1     | 0.004   | 3.54                | AK026659         | purinergic receptor P2Y, G-protein coupled, 1                                    |
| GE779950  | RALYL     | 0.011   | 3.54                | A1791127         | Hypothetical protein LOC138046                                                   |
| GE55803   | ANLN      | 0.000   | 3.56                | NM_018685        | anillin, actin binding protein (scraps homolog, Drosophila)                      |
| GE87885   | LOC388279 | 0.037   | 3.57                | AV725613         | Hypothetical gene supported by AF275804                                          |
| GE54754   | TSPAN9    | 0.033   | 3.68                | NM_006675        | tetraspanin 9                                                                    |
| GE88593   | GNA11     | 0.006   | 3.70                | AL110227         | guanine nucleotide binding protein (G protein), alpha 11 (Gq class)              |
| GE560143  | ZNF488    | 0.047   | 3.71                | NM_153034        | zinc finger protein 488                                                          |
| GE546951  | HRNBP3    | 0.031   | 3.72                | BF222375         | Similar to ataxin 2-binding protein 1 isoform 4; hexaribonucleotide binding prot |
| GE59670   | COL4A2    | 0.025   | 3.73                | NM_001846        | collagen, type IV, alpha 2                                                       |
| GE82389   | PBK       | 0.001   | 3.77                | NM_018492        | PDZ binding kinase                                                               |
| GE81449   | GDF15     | 0.009   | 3.79                | NM_004864        | growth differentiation factor 15                                                 |
| GE84281   | SETBP1    | 0.031   | 3.80                | AK023905         | Homo sapiens cDNA FLJ13843 fis, clone THYRO1000796.                              |
| GE57549   | COL7A1    | 0.043   | 3.82                | NM_000094        | collagen, type VII, alpha 1 (epidermolysis bullosa, dystrophic, dominant and rec |
| GE80871   | ARHGAP11A | 0.006   | 3.82                | NM_014783        | Rho GTPase activating protein 11A                                                |
| GE562082  | PAK2      | 0.003   | 3.86                | NM_002577        | p21 (CDKN1A)-activated kinase 2                                                  |
| GE574933  | E2F2      | 0.013   | 3.87                | NM_004091        | E2F transcription factor 2                                                       |
| GE471816  | LOC375010 | 0.048   | 3.88                | BC035915         | Hypothetical LOC375010                                                           |
| GE558313  | TBC1D8    | 0.041   | 3.89                | BM970493         | TBC1 domain family, member 8 (with GRAM domain)                                  |
| GE57964   | CEL       | 0.016   | 3.91                | NM_001807        | carboxyl ester lipase (bile salt-stimulated lipase)                              |
| GE59386   | UBE2C     | 0.015   | 3.93                | NM_007019        | ubiquitin-conjugating enzyme E2C                                                 |
| GE62547   | AURKB     | 0.000   | 3.95                | NM_004217        | aurora kinase B                                                                  |
| GE79659   | ANGPTL1   | 0.035   | 3.99                | NM_004673        | angiopoietin-like 1                                                              |
| GE54551   | PLK2      | 0.005   | 4.00                | NM_006622        | polo-like kinase 2 (Drosophila)                                                  |
| GE82558   | SPC25     | 0.001   | 4.00                | NM_020675        | spindle pole body component 25 homolog (S. cerevisiae)                           |
| GE55708   | DEPDC1B   | 0.002   | 4.03                | NM_018369        | DEP domain containing 1B                                                         |
| GE87517   | CENPM     | 0.003   | 4.10                | NM_024053        | chromosome 22 open reading frame 18                                              |
| GE81252   | THBS1     | 0.013   | 4.10                | NM_003246        | thrombospondin 1                                                                 |
| GE79793   | KIF15     | 0.001   | 4.12                | NM_020242        | kinesin family member 15                                                         |
| GE479776  | HOXB5     | 0.050   | 4.14                | NM_002147        | homeobox B5                                                                      |
| GE54996   | SPOCK1    | 0.007   | 4.18                | NM_004598        | sparc/osteonectin, cwcv and kazal-like domains proteoglycan (testican) 1         |
| GE85491   | LOX       | 0.003   | 4.27                | CD678960         | Lysyl oxidase                                                                    |
| GE81745   | PLA2R1    | 0.011   | 4.36                | NM_007366        | phospholipase A2 receptor 1, 180kDa                                              |
| GE753422  | FNDC1     | 0.000   | 4.38                | H88455           | Fibronectin type III domain containing 1                                         |

| Column ID | Symbol     | p-value | FC(AI delet vs. NI) | Accession number | Description                                                                      |
|-----------|------------|---------|---------------------|------------------|----------------------------------------------------------------------------------|
| GE672411  | THOC7      | 0.016   | 4.46                | AI274553         | qv62b06.x1 NCI_CGAP_Ut1 Homo sapiens cDNA clone IMAGE:1986131 3', mRNA sequence. |
| GE58567   | UBE2T      | 0.008   | 4.47                | NM_014176        | ubiquitin-conjugating enzyme E2T (putative)                                      |
| GE87317   | HTRA3      | 0.004   | 4.48                | NM_053044        | HtrA serine peptidase 3                                                          |
| GE82539   | XAGE1D     | 0.009   | 4.49                | NM_020411        | X antigen family, member 1                                                       |
| GE62777   | PLA2R1     | 0.025   | 4.51                | NM_007366        | phospholipase A2 receptor 1, 180kDa                                              |
| GE566099  | CTAG2      | 0.005   | 4.67                | NM_020994        | cancer/testis antigen 2                                                          |
| GE59394   | BIRC5      | 0.016   | 4.70                | NM_001168        | baculoviral IAP repeat-containing 5 (survivin)                                   |
| GE58498   | SPON2      | 0.041   | 5.01                | AA149494         | Spondin 2, extracellular matrix protein                                          |
| GE61118   | LTBP1      | 0.007   | 5.14                | NM_000627        | latent transforming growth factor beta binding protein 1                         |
| GE57824   | SERPINE1   | 0.004   | 5.22                | NM_000602        | serpin peptidase inhibitor, clade E (nexin, plasminogen activator inhibitor type |
| GE768333  | GCUD2      | 0.010   | 5.34                | AI630319         | Family with sequence similarity 72, member A                                     |
| GE490464  | LOC647946  | 0.024   | 5.47                | AK090603         | CDNA FLJ33284 fis, clone ASTRO2009458                                            |
| GE629415  | LOC285965  | 0.000   | 5.50                | AL833583         | hypothetical protein LOC285965                                                   |
| GE79081   | COL3A1     | 0.010   | 5.90                | NM_000090        | collagen, type III, alpha 1 (Ehlers-Danlos syndrome type IV, autosomal dominant) |
| GE59276   | NCRNA00084 | 0.024   | 6.09                | BF094597         | Trophoblast-derived noncoding RNA                                                |
| GE83343   | C2ORF14    | 0.049   | 6.27                | AL136789         | chromosome 2 open reading frame 14                                               |
| GE80570   | MSTN       | 0.048   | 6.77                | NM_005259        | growth differentiation factor 8                                                  |
| GE782559  | IGF2       | 0.029   | 6.83                | AF318382         | chromosome 11 open reading frame 43                                              |
| GE55782   | ASPM       | 0.022   | 6.86                | NM_018136        | asp (abnormal spindle)-like, microcephaly associated (Drosophila)                |
| GE80888   | COL1A1     | 0.015   | 6.90                | NM_000088        | collagen, type I, alpha 1                                                        |
| GE527787  | MAGEC1     | 0.048   | 7.04                | NM_005462        | melanoma antigen family C, 1                                                     |
| GE62449   | NEK2       | 0.005   | 7.84                | NM_002497        | NIMA (never in mitosis gene a)-related kinase 2                                  |
| GE57073   | POSTN      | 0.019   | 12.61               | NM_006475        | periostin, osteoblast specific factor                                            |
