# Supplementary material
Source: PubMed Central journal article supplement (PMC8094244)
Supplement: BPA-21-533-s002.pdf [file BPA-21-533-s002.pdf]

**Supplementary Material 1 : List of genes located in the deleted 11 p arm region.**

| Name      | Refseq       | Description                                                           | Cytobands         | Down and Up Regulation | Pathway Link |
|-----------|--------------|-----------------------------------------------------------------------|-------------------|------------------------|--------------|
| CALCA     | NM_001033953 | calcitonin/calcitonin-related polypeptide, alpha                      | 11p15.2           |                        |              |
| CALCB     | NM_000728    | calcitonin-related polypeptide, beta                                  | 11p15.2           |                        |              |
| INSC      | NM_001031853 | inscuteable homolog (Drosophila)                                      | 11p15.2           |                        |              |
| SOX6      | NM_001145811 | SRY (sex determining region Y)-box 6                                  | 11p15.2 - 11p15.1 | X (-3,02)              | X            |
| C11orf58  | NM_001142705 | small acidic protein                                                  | 11p15.1           | X (-2,00)              |              |
| PLEKHA7   | NM_175058    | pleckstrin homology domain containing, family A member 7              | 11p15.1           |                        |              |
| RPS13     | NM_001017    | ribosomal protein S13                                                 | 11p15.1           | X (-2,64)              |              |
| PIK3C2A   | NM_002645    | phosphoinositide-3-kinase, class 2, alpha polypeptide                 | 11p15.1           | X (-1,61)              |              |
| NUCB2     | NM_005013    | nucleobindin 2                                                        | 11p15.1           | X (-2,05)              |              |
| KCNJ11    | NM_000525    | potassium inwardly-rectifying channel, subfamily J, member 11         | 11p15.1           |                        |              |
| ABCC8     | NM_000352    | ATP-binding cassette, sub-family C (CFTR/MRP), member 8               | 11p15.1           |                        |              |
| USH1C     | NM_005709    | Usher syndrome 1C (autosomal recessive, severe)                       | 11p15.1           |                        |              |
| MYOD1     | NM_002478    | myogenic differentiation 1                                            | 11p15.1           |                        | X            |
| KCNC1     | NM_001112741 | potassium voltage-gated channel, Shaw-related subfamily, member 1     | 11p15.1           |                        |              |
| SERGEF    | NM_012139    | deafness locus associated putative guanine nucleotide exchange factor | 11p15.1           | X (-2,25)              |              |
| TPH1      | NM_004179    | tryptophan hydroxylase 1 (tryptophan 5-monooxygenase)                 | 11p15.1           |                        |              |
| SAAL1     | NM_138421    | serum amyloid A-like 1                                                | 11p15.1           |                        |              |
| SAA3P     | NR_026576    | serum amyloid A3 pseudogene                                           | 11p15.1           |                        |              |
| MRGPRX3   | NM_054031    | frizzled homolog 4 (Drosophila)                                       | 11p15.1           |                        |              |
| MRGPRX4   | NM_054032    | MAS-related GPR, member X4                                            | 11p15.1           |                        |              |
| LOC494141 | NR_026541    | mitochondrial carrier triple repeat 1 pseudogene                      | 11p15.1           |                        |              |
| SAA4      | NM_006512    | serum amyloid A4, constitutive                                        | 11p15.1           |                        |              |
| SAA2      | NM_001127380 | serum amyloid A2                                                      | 11p15.1           |                        |              |
| SAA1      | NM_000331    | serum amyloid A1                                                      | 11p15.1           |                        |              |
| HPS5      | NM_007216    | Hermansky-Pudlak syndrome 5                                           | 11p15.1           |                        |              |
| GTF2H1    | NM_001142307 | general transcription factor IIH, polypeptide 1, 62kDa                | 11p15.1           | X (-1,76)              | X            |
| LDHA      | NM_001135239 | lactate dehydrogenase A                                               | 11p15.1           |                        |              |
| LDHC      | NM_002301    | lactate dehydrogenase C                                               | 11p15.1           |                        |              |
| LDHAL6A   | NM_001144071 | Lactate dehydrogenase A-like 6A                                       | 11p15.1           |                        |              |
| TSG101    | NM_006292    | tumor susceptibility gene 101                                         | 11p15.1           | X (-1,72)              | X            |
| UEVLD     | NM_001040697 | ubiquitin-conjugating enzyme E2-like                                  | 11p15.1           | X (-1,59)              |              |
| SPTY2D1   | NM_194285    | SPT2, Suppressor of Ty, domain containing 1 (S. cerevisiae)           | 11p15.1           |                        |              |
| TMEM86A   | NM_153347    | transmembrane protein 86A                                             | 11p15.1           |                        |              |

**Supplementary Material 1: List of genes located in the deleted 11 p arm region.**

| Name    | Refseq       | Description                                                                             | Cytobands | Down and Up Regulation | Pathway Link |
|---------|--------------|-----------------------------------------------------------------------------------------|-----------|------------------------|--------------|
| MRGPRX1 | NM_147199    | MAS-related GPR, member X1                                                              | 11p15.1   |                        |              |
| MRGPRX2 | NM_054030    | MAS-related GPR, member X2                                                              | 11p15.1   |                        |              |
| ZDHHC13 | NM_001001483 | zinc finger, DHHC-type containing 13                                                    | 11p15.1   |                        |              |
| CSRP3   | NM_001127656 | cysteine and glycine-rich protein 3 (cardiac LIM protein)                               | 11p15.1   |                        |              |
| E2F8    | NM_024680    | E2F transcription factor 8                                                              | 11p15.1   | X (-1,84)              |              |
| NAV2    | NM_001111018 | neuron navigator 2                                                                      | 11p15.1   |                        |              |
| DBX1    | NM_001029865 | developing brain homeobox 1                                                             | 11p15.1   |                        |              |
| HTATIP2 | NM_006410    | HIV-1 Tat interactive protein 2, 30kDa                                                  | 11p15.1   | X (-2,21)              | X            |
| PRMT3   | NM_001145166 | HMT1 hnRNP methyltransferase-like 3 (S. cerevisiae)                                     | 11p15.1   |                        |              |
| SLC6A5  | NM_004211    | solute carrier family 6 (neurotransmitter transporter, glycine), member 5               | 11p15.1   |                        |              |
| NELL1   | NM_006157    | NEL-like 1 (chicken)                                                                    | 11p15.1   |                        |              |
| ANO5    | NM_001142649 | transmembrane protein 16E                                                               | 11p14.3   | X (-1,78)              |              |
| SLC17A6 | NM_020346    | solute carrier family 17 (sodium-dependent inorganic phosphate cotransporter), member 6 | 11p14.3   |                        |              |
| FANCF   | NM_022725    | Fanconi anemia, complementation group F                                                 | 11p14.3   |                        |              |
| GAS2    | NM_001143830 | growth arrest-specific 2                                                                | 11p14.3   |                        |              |
| SVIP    | NM_148893    | Hypothetical protein DKFZp313A2432                                                      | 11p14.3   |                        |              |
| LUZP2   | NM_001009909 | leucine zipper protein 2                                                                | 11p14.3   |                        |              |
| ANO3    | NM_031418    | transmembrane protein 16C                                                               | 11p14.2   |                        |              |
| MUC15   | NM_001135091 | Mucin 15                                                                                | 11p14.2   |                        |              |
| SLC5A12 | NM_178498    | Solute carrier family 5 (sodium/glucose cotransporter), member 12                       | 11p14.2   |                        |              |
| FIBIN   | NM_203371    | fin bud initiation factor homolog (zebrafish)                                           | 11p14.2   |                        |              |
| BBOX1   | NM_003986    | butyrobetaine (gamma), 2-oxoglutarate dioxygenase (gamma-butyrobetaine hydroxylase) 1   | 11p14.2   |                        |              |
| CCDC34  | NM_030771    | Coiled-coil domain containing 34                                                        | 11p14.1   |                        |              |
| LGR4    | NM_018490    | leucine-rich repeat-containing G protein-coupled receptor 4                             | 11p14.1   |                        |              |
| LIN7C   | NM_018362    | lin-7 homolog C (C. elegans)                                                            | 11p14.1   |                        |              |
| BDNF    | NM_001143805 | brain-derived neurotrophic factor                                                       | 11p14.1   |                        |              |
| KIF18A  | NM_031217    | kinesin family member 18A                                                               | 11p14.1   |                        |              |
| METT5D1 | NM_001113528 | Methyltransferase 5 domain containing 1                                                 | 11p14.1   | 1,86                   |              |
| KCNA4   | NM_002233    | potassium voltage-gated channel, shaker-related subfamily, member 4                     | 11p14.1   |                        |              |
| FSHB    | NM_000510    | Follicle stimulating hormone, beta polypeptide                                          | 11p14.1   |                        |              |

**Supplementary Material 1: List of genes located in the deleted 11 p arm region.**

| Name      | Refseq       | Description                                                                                         | Cytobands | Down and Up Regulation | Pathway Link |
|-----------|--------------|-----------------------------------------------------------------------------------------------------|-----------|------------------------|--------------|
| MPPED2    | NM_001145399 | metallophosphoesterase domain containing 2                                                          | 11p14.1   | X (-2,02)              |              |
| DCDC1     | NM_181807    | doublecortin domain containing 1                                                                    | 11p13     |                        |              |
| DNAJC24   | NM_181706    | zinc finger, CSL-type containing 3                                                                  | 11p13     |                        |              |
| IMMP1L    | NM_144981    | IMP1 inner mitochondrial membrane peptidase-like (S. cerevisiae)                                    | 11p13     |                        |              |
| ELP4      | NM_019040    | elongation protein 4 homolog (S. cerevisiae)                                                        | 11p13     |                        |              |
| PAX6      | NM_000280    | paired box gene 6 (aniridia, keratitis)                                                             | 11p13     |                        |              |
| RCN1      | NM_002901    | Down syndrome critical region gene 1                                                                | 11p13     | X (-2,89)              |              |
| WT1       | NM_000378    | Wilms tumor 1                                                                                       | 11p13     |                        | X            |
| WIT1      | NR_023920    | Wilms tumor upstream neighbor 1                                                                     | 11p13     |                        |              |
| EIF3M     | NM_006360    | dendritic cell protein                                                                              | 11p13     | X (-1,93)              |              |
| CCDC73    | NM_001008391 | coiled-coil domain containing 73                                                                    | 11p13     |                        |              |
| PRRG4     | NM_024081    | proline rich Gla (G-carboxyglutamic acid) 4 (transmembrane)                                         | 11p13     |                        |              |
| QSER1     | NM_001076786 | Hypothetical protein FLJ21924                                                                       | 11p13     |                        |              |
| DEPDC7    | NM_001077242 | novel 58.3 KDA protein                                                                              | 11p13     |                        |              |
| TCP11L1   | NM_018393    | t-complex 11 (mouse) like 1                                                                         | 11p13     |                        |              |
| LOC283267 | NR_015451    | hypothetical protein LOC283267                                                                      | 11p13     |                        |              |
| CSTF3     | NM_001326    | cleavage stimulation factor, 3' pre-RNA, subunit 3, 77kDa                                           | 11p13     |                        |              |
| HIPK3     | NM_001048200 | homeodomain interacting protein kinase 3                                                            | 11p13     | X (-1,73)              |              |
| C11orf41  | NM_012194    | chromosome 11 open reading frame 41                                                                 | 11p13     | X (-1,53)              |              |
| C11orf91  | NM_001166692 | chromosome 11 open reading frame 91                                                                 | 11p13     |                        |              |
| CD59      | NM_000611    | CD59 antigen p18-20 (antigen identified by monoclonal antibodies 16.3A5, EJ16, EJ30, EL32 and G344) | 11p13     |                        |              |
| FBXO3     | NM_012175    | F-box protein 3                                                                                     | 11p13     | X (-1,75)              |              |
| LMO2      | NM_001142315 | LIM domain only 2 (rhombotin-like 1)                                                                | 11p13     |                        |              |
| CAPRIN1   | NM_005898    | GPI-anchored membrane protein 1                                                                     | 11p13     |                        |              |
| NAT10     | NM_001144030 | N-acetyltransferase-like protein                                                                    | 11p13     |                        |              |
| ABTB2     | NM_145804    | ankyrin repeat and BTB (POZ) domain containing 2                                                    | 11p13     |                        |              |
| CAT       | NM_001752    | catalase                                                                                            | 11p13     |                        |              |
| ELF5      | NM_001422    | E74-like factor 5 (ets domain transcription factor)                                                 | 11p13     |                        |              |
| EHF       | NM_012153    | ets homologous factor                                                                               | 11p13     |                        |              |
| APIP      | NM_015957    | APAF1 interacting protein                                                                           | 11p13     | X (-2,28)              |              |

**Supplementary Material 1: List of genes located in the deleted 11 p arm region.**

| Name          | Refseq       | Description                                                                   | Cytobands       | Down and Up Regulation | Pathway Link |
|---------------|--------------|-------------------------------------------------------------------------------|-----------------|------------------------|--------------|
| CD44          | NM_000610    | CD44 antigen (homing function and Indian blood group system)                  | 11p13           | X (-1,82)              | X            |
| SLC1A2        | NM_004171    | Solute carrier family 1 (glial high affinity glutamate transporter), member 2 | 11p13           | X (-2,17)              |              |
| PAMR1         | NM_001001991 | regeneration associated muscle protease                                       | 11p13           |                        |              |
| FJX1          | NM_014344    | four jointed box 1 (Drosophila)                                               | 11p13           |                        |              |
| TRIM44        | NM_017583    | tripartite motif-containing 44                                                | 11p13           |                        |              |
| LDLRAD3       | NM_174902    | low density lipoprotein receptor class A domain containing 3                  | 11p13           |                        |              |
| COMMMD9       | NM_001101653 | COMM domain containing 9                                                      | 11p13           |                        |              |
| PRR5L         | NM_001160167 | hypothetical protein FLJ14213                                                 | 11p13 - p12     |                        |              |
| TRAF6         | NM_004620    | TNF receptor-associated factor 6                                              | 11p12           |                        | X            |
| RAG1          | NM_000448    | recombination activating gene 1                                               | 11p12           |                        |              |
| RAG2          | NM_000536    | recombination activating gene 2                                               | 11p12           |                        |              |
| C11orf74      | NM_138787    | HEPIS                                                                         | 11p12           |                        |              |
| LRRC4C        | NM_020929    | Leucine rich repeat containing 4C                                             | 11p12           |                        |              |
| API5          | NM_001142930 | apoptosis inhibitor 5                                                         | 11p12           | X (-1,59)              |              |
| TTC17         | NM_018259    | Tetratricopeptide repeat domain 17                                            | 11p12 - 11p11.2 | X (-1,69)              |              |
| HSD17B12      | NM_016142    | hydroxysteroid (17-beta) dehydrogenase 12                                     | 11p11.2         | X (-2,20)              |              |
| ALKBH3        | NM_139178    | hypothetical protein LOC221120                                                | 11p11.2         | X (-1,68)              |              |
| LOC729799     | NR_026952    | SEC14-like 1 pseudogene                                                       | 11p11.2         |                        |              |
| LOC387763     | NM_001145033 | hypothetical protein LOC387763                                                | 11p11.2         |                        |              |
| ACCS          | NM_001127219 | 1-aminocyclopropane-1-carboxylate synthase                                    | 11p11.2         |                        |              |
| EXT2          | NM_000401    | exostoses (multiple) 2                                                        | 11p11.2         |                        |              |
| ALX4          | NM_021926    | aristaless-like homeobox 4                                                    | 11p11.2         |                        |              |
| CD82          | NM_001024844 | CD82 antigen                                                                  | 11p11.2         |                        |              |
| TSPAN18       | NM_130783    | tetraspanin 18                                                                | 11p11.2         | 2,69                   |              |
| TP53I11       | NM_001076787 | Tumor protein p53 inducible protein 11                                        | 11p11.2         |                        |              |
| LOC221122     | NR_026681    | hypothetical protein LOC221122                                                | 11p11.2         |                        |              |
| PRDM11        | NM_020229    | PR domain containing 11                                                       | 11p11.2         |                        |              |
| SYT13         | NM_020826    | synaptotagmin XIII                                                            | 11p11.2         |                        |              |
| CHST1         | NM_003654    | carbohydrate (keratan sulfate Gal-6) sulfotransferase 1                       | 11p11.2         |                        |              |
| DKFZp779M0652 | NR_027134    | Hypothetical protein DKFZp779M0652                                            | 11p11.2         |                        |              |
| SLC35C1       | NM_001145265 | solute carrier family 35, member C1                                           | 11p11.2         |                        |              |
| CRY2          | NM_001127457 | cryptochrome 2 (photolyase-like)                                              | 11p11.2         |                        |              |
| MAPK8IP1      | NM_005456    | mitogen-activated protein kinase 8 interacting protein 1                      | 11p11.2         | X (-1,75)              |              |

**Supplementary Material 1: List of genes located in the deleted 11 p arm region.**

| <b>Name</b> | <b>Refseq</b> | <b>Description</b>                               | <b>Cytobands</b> | <b>Down and Up Regulation</b> | <b>Pathway Link</b> |
|-------------|---------------|--------------------------------------------------|------------------|-------------------------------|---------------------|
| PEX16       | NM_004813     | peroxisomal biogenesis factor 16                 | 11p11.2          |                               |                     |
| GYLTL1B     | NM_152312     | glycosyltransferase-like 1B                      | 11p11.2          | X (-1,97)                     |                     |
| PHF21A      | NM_001101802  | PHD finger protein 21A                           | 11p11.2          |                               | X                   |
| CREB3L1     | NM_052854     | cAMP responsive element binding protein 3-like 1 | 11p11.2          |                               |                     |
| DGKZvar4    | NM_201532     | diacylglycerol kinase, zeta 104kDa               | 11p11.2          | X (-1,75)                     | X                   |
| MDK         | NM_001012334  | midkine (neurite growth-promoting factor 2)      | 11p11.2          |                               |                     |
| CHRM4       | NM_000741     | cholinergic receptor, muscarinic 4               | 11p11.2          |                               |                     |
| AMBRA1      | NM_017749     | Hypothetical protein FLJ20294                    | 11p11.2          | 2,47                          |                     |
